# Supplementary material for: Brain corticogenesis and cholesterol homeostasis promotes SARS-CoV-2 infection and replication
Source: Research Square preprint supplement (doi:10.21203/rs.3.rs-2481841/v1), 2023-02-10
Supplement: Supplementary file 1 [file 2bce658390507f1eb7d8c95c.xlsx]

## Sheet: clustermarker
gene	p_val	avg_log2FC	pct.1	pct.2	p_val_adj	cluster
NRXN1	0	1.36929	0.768	0.446	0	ventral_progenitors_and_neurons_1
KCNQ1OT1	0	1.17689	0.637	0.427	0	ventral_progenitors_and_neurons_1
ANK3	0	1.17252	0.513	0.277	0	ventral_progenitors_and_neurons_1
GRIA2	0	1.13034	0.569	0.293	0	ventral_progenitors_and_neurons_1
PCDH9	0	1.10116	0.403	0.235	0	ventral_progenitors_and_neurons_1
CELF4	0	1.00027	0.501	0.305	0	ventral_progenitors_and_neurons_1
POU2F2	0	0.94948	0.312	0.164	0	ventral_progenitors_and_neurons_1
SRRM4	0	0.889831	0.353	0.198	0	ventral_progenitors_and_neurons_1
MAB21L1	0	0.858325	0.216	0.063	0	ventral_progenitors_and_neurons_1
GPM6A	0	0.804521	0.831	0.706	0	ventral_progenitors_and_neurons_1
WSB1	0	0.794542	0.825	0.758	0	ventral_progenitors_and_neurons_1
NTM	1.98991e-279	0.877756	0.329	0.179	4.96204e-275	ventral_progenitors_and_neurons_1
THSD7A	4.55825e-258	0.755931	0.504	0.349	1.13665e-253	ventral_progenitors_and_neurons_1
NOVA1	9.52509e-242	0.9739	0.476	0.369	2.37518e-237	ventral_progenitors_and_neurons_1
MYT1L	1.38449e-226	0.789365	0.354	0.221	3.45236e-222	ventral_progenitors_and_neurons_1
ZFHX3	1.05272e-212	0.885143	0.29	0.172	2.62507e-208	ventral_progenitors_and_neurons_1
CELF5	2.71053e-203	0.758016	0.401	0.284	6.75897e-199	ventral_progenitors_and_neurons_1
PCLO	2.56195e-195	0.780266	0.378	0.258	6.38847e-191	ventral_progenitors_and_neurons_1
SORBS2	1.15103e-193	0.833026	0.389	0.279	2.87021e-189	ventral_progenitors_and_neurons_1
MEIS2	2.04207e-118	0.925228	0.552	0.55	5.09211e-114	ventral_progenitors_and_neurons_1
SFRP1	0	1.08705	0.631	0.4	0	RGCs
ID4	0	1.01356	0.692	0.491	0	RGCs
CREB5	0	0.890505	0.423	0.196	0	RGCs
SYNE2	0	0.88546	0.646	0.461	0	RGCs
ADAMTS6	0	0.880851	0.299	0.113	0	RGCs
HES1	0	0.849875	0.51	0.269	0	RGCs
INTU	0	0.846632	0.5	0.315	0	RGCs
SOX2	0	0.782087	0.652	0.422	0	RGCs
B3GAT2	0	0.780646	0.441	0.247	0	RGCs
TTYH1	0	0.770055	0.726	0.528	0	RGCs
HELLS	0	0.764676	0.349	0.163	0	RGCs
GLI3	0	0.756332	0.393	0.2	0	RGCs
C1orf61	0	0.72801	0.906	0.828	0	RGCs
GINS2	0	0.704366	0.371	0.202	0	RGCs
IFI44L	0	0.686387	0.312	0.129	0	RGCs
FABP7	0	0.67193	0.694	0.573	0	RGCs
ZFP36L1	0	0.655796	0.459	0.287	0	RGCs
MYO10	0	0.648	0.377	0.224	0	RGCs
TLE4	7.315e-238	0.62565	0.48	0.355	1.82407e-233	RGCs
EXOG	6.3001e-229	0.636944	0.353	0.233	1.57099e-224	RGCs
NEUROD6	0	1.64538	0.807	0.512	0	cortical_neurons
THSD7A	0	1.55481	0.873	0.291	0	cortical_neurons
NFIB	0	1.37973	0.849	0.625	0	cortical_neurons
GPM6A	0	1.37645	0.975	0.684	0	cortical_neurons
GRIA2	0	1.36308	0.805	0.256	0	cortical_neurons
MEF2C	0	1.34827	0.515	0.186	0	cortical_neurons
RUNX1T1	0	1.33816	0.759	0.234	0	cortical_neurons
NEUROD2	0	1.32794	0.671	0.207	0	cortical_neurons
BCL11A	0	1.29871	0.892	0.488	0	cortical_neurons
NRXN1	0	1.28199	0.919	0.421	0	cortical_neurons
CSRP2	0	1.27813	0.828	0.596	0	cortical_neurons
CNTNAP2	0	1.25962	0.752	0.395	0	cortical_neurons
FEZF2	0	1.25812	0.615	0.242	0	cortical_neurons
STMN2	0	1.21424	0.972	0.795	0	cortical_neurons
SYT1	0	1.17142	0.9	0.486	0	cortical_neurons
ZEB2	0	1.16444	0.731	0.297	0	cortical_neurons
AC004158.1	0	1.16057	0.524	0.097	0	cortical_neurons
IGFBP5	0	1.12118	0.535	0.285	0	cortical_neurons
BCL11B	0	1.10844	0.638	0.229	0	cortical_neurons
NTS	2.3973e-256	1.38068	0.291	0.147	5.97791e-252	cortical_neurons
PLCG2	0	2.20962	0.95	0.278	0	ventral_progenitors_and_neurons_2
HMGCS1	0	2.07624	0.86	0.519	0	ventral_progenitors_and_neurons_2
HSPH1	0	1.6579	0.68	0.328	0	ventral_progenitors_and_neurons_2
SCD	0	1.54569	0.698	0.426	0	ventral_progenitors_and_neurons_2
CELF1	0	1.52127	0.686	0.395	0	ventral_progenitors_and_neurons_2
AL078639.1	0	1.51655	0.499	0.186	0	ventral_progenitors_and_neurons_2
HIST2H2BE	0	1.46043	0.371	0.093	0	ventral_progenitors_and_neurons_2
GRIA2	0	1.40579	0.657	0.318	0	ventral_progenitors_and_neurons_2
HIST1H2AC	0	1.26741	0.341	0.097	0	ventral_progenitors_and_neurons_2
CREBRF	1.45459e-290	1.31155	0.502	0.219	3.62716e-286	ventral_progenitors_and_neurons_2
DNAJB1	1.94475e-259	1.29575	0.513	0.239	4.84944e-255	ventral_progenitors_and_neurons_2
GRIN2B	2.13574e-255	1.2596	0.406	0.155	5.32568e-251	ventral_progenitors_and_neurons_2
PURB	2.52686e-236	1.25205	0.448	0.2	6.30098e-232	ventral_progenitors_and_neurons_2
PREPL	8.1916e-232	1.28466	0.515	0.274	2.04266e-227	ventral_progenitors_and_neurons_2
HMGCR	9.96692e-224	1.30574	0.546	0.315	2.48535e-219	ventral_progenitors_and_neurons_2
XPO1	1.18122e-218	1.19455	0.618	0.407	2.94549e-214	ventral_progenitors_and_neurons_2
PANK3	5.11826e-218	1.31243	0.508	0.275	1.27629e-213	ventral_progenitors_and_neurons_2
INSIG1	1.61249e-213	1.28129	0.395	0.172	4.02091e-209	ventral_progenitors_and_neurons_2
RYBP	1.73246e-178	1.23774	0.461	0.258	4.32007e-174	ventral_progenitors_and_neurons_2
NSMF	5.19485e-128	1.21053	0.424	0.252	1.29539e-123	ventral_progenitors_and_neurons_2
CENPF	0	2.78156	0.828	0.175	0	cycling_progenitors
TOP2A	0	2.66789	0.844	0.183	0	cycling_progenitors
HIST1H4C	0	2.31857	0.837	0.656	0	cycling_progenitors
UBE2C	0	2.12264	0.657	0.136	0	cycling_progenitors
MKI67	0	2.03769	0.704	0.071	0	cycling_progenitors
NUSAP1	0	2.03459	0.763	0.131	0	cycling_progenitors
PTTG1	0	2.0285	0.767	0.277	0	cycling_progenitors
HMGB2	0	1.99313	0.877	0.461	0	cycling_progenitors
ASPM	0	1.95442	0.634	0.055	0	cycling_progenitors
CCNB1	0	1.69316	0.525	0.092	0	cycling_progenitors
CDC20	0	1.65536	0.517	0.074	0	cycling_progenitors
UBE2S	0	1.64104	0.799	0.488	0	cycling_progenitors
TPX2	0	1.62314	0.636	0.083	0	cycling_progenitors
CCNB2	0	1.59432	0.59	0.092	0	cycling_progenitors
C21orf58	0	1.59103	0.638	0.101	0	cycling_progenitors
KPNA2	0	1.44625	0.658	0.302	0	cycling_progenitors
SMC4	0	1.43439	0.671	0.151	0	cycling_progenitors
H2AFX	0	1.43352	0.695	0.194	0	cycling_progenitors
HMGN2	0	1.42487	0.935	0.753	0	cycling_progenitors
CDK1	0	1.42253	0.595	0.098	0	cycling_progenitors
TAGLN3	0	1.0499	0.529	0.381	0	midbrain_cells
LHX1	0	1.00177	0.253	0.099	0	midbrain_cells
MLLT11	0	0.890043	0.753	0.613	0	midbrain_cells
STMN2	0	0.842059	0.907	0.804	0	midbrain_cells
CD24	0	0.835969	0.651	0.497	0	midbrain_cells
TUBA1A	0	0.728429	1	0.999	0	midbrain_cells
TMSB10	0	0.707379	0.999	0.995	0	midbrain_cells
TFAP2A	0	0.694654	0.202	0.074	0	midbrain_cells
LHX5-AS1	0	0.685576	0.18	0.057	0	midbrain_cells
GAP43	0	0.681761	0.772	0.655	0	midbrain_cells
PTMS	0	0.66977	0.918	0.878	0	midbrain_cells
TUBB2B	0	0.660536	0.975	0.951	0	midbrain_cells
STMN1	0	0.619781	0.946	0.901	0	midbrain_cells
TFAP2B	4.45211e-282	0.679183	0.198	0.078	1.11018e-277	midbrain_cells
CNTN2	3.0174e-280	0.925272	0.209	0.09	7.52418e-276	midbrain_cells
NHLH1	2.01317e-216	0.626408	0.278	0.152	5.02003e-212	midbrain_cells
ROBO3	1.87591e-211	0.910846	0.195	0.093	4.67778e-207	midbrain_cells
CRABP1	1.77736e-198	0.939609	0.535	0.43	4.43202e-194	midbrain_cells
RGMB	7.3967e-166	0.752948	0.275	0.171	1.84444e-161	midbrain_cells
PBX3	1.57194e-164	0.662654	0.312	0.201	3.9198e-160	midbrain_cells
PLCG2	0	3.00235	0.599	0.242	0	unknown
NEAT1	0	2.12525	0.519	0.255	0	unknown
HSPA1B	0	1.93846	0.413	0.12	0	unknown
AC124068.2	0	1.93083	0.138	0.04	0	unknown
AL627171.2	0	1.85082	0.119	0.017	0	unknown
HSPA1A	0	1.73452	0.241	0.082	0	unknown
DNAJB1	0	1.65202	0.456	0.209	0	unknown
HSPH1	0	1.50969	0.53	0.304	0	unknown
LINC00324	0	1.49039	0.186	0.067	0	unknown
HSPA6	0	1.44841	0.182	0.03	0	unknown
HSPB1	0	1.34289	0.606	0.463	0	unknown
AC010319.3	1.60274e-212	3.7188	0.184	0.087	3.99658e-208	unknown
AC108134.2	7.87531e-139	1.77496	0.176	0.099	1.96379e-134	unknown
HIST1H2BG	4.80084e-59	1.32982	0.15	0.1	1.19714e-54	unknown
POLR2B	1.41792e-57	1.06252	0.345	0.303	3.53573e-53	unknown
ELP6	5.0651e-52	1.18017	0.123	0.196	1.26303e-47	unknown
MROH8	5.83609e-37	1.6457	0.102	0.069	1.45529e-32	unknown
PRIM1	1.16986e-21	1.0544	0.09	0.129	2.91716e-17	unknown
TDP1	5.61027e-16	2.67263	0.156	0.135	1.39898e-11	unknown
CYB5D2	0.000375538	1.08661	0.102	0.119	1	unknown
HES6	0	2.22267	0.852	0.46	0	IPs_and_early_cortical_neurons
CRABP1	0	1.72819	0.685	0.429	0	IPs_and_early_cortical_neurons
NHLH1	0	1.58384	0.576	0.144	0	IPs_and_early_cortical_neurons
MIAT	0	1.45543	0.826	0.504	0	IPs_and_early_cortical_neurons
EOMES	0	1.4321	0.395	0.06	0	IPs_and_early_cortical_neurons
GADD45G	0	1.35459	0.685	0.296	0	IPs_and_early_cortical_neurons
RGS16	0	1.07225	0.405	0.156	0	IPs_and_early_cortical_neurons
TAC3	0	1.05234	0.226	0.054	0	IPs_and_early_cortical_neurons
NEUROG2	0	0.98994	0.545	0.214	0	IPs_and_early_cortical_neurons
SOX11	0	0.978882	0.901	0.709	0	IPs_and_early_cortical_neurons
INSM1	0	0.963083	0.508	0.171	0	IPs_and_early_cortical_neurons
DLL1	0	0.918509	0.281	0.086	0	IPs_and_early_cortical_neurons
SSTR2	0	0.889143	0.479	0.222	0	IPs_and_early_cortical_neurons
CHD7	0	0.84894	0.696	0.388	0	IPs_and_early_cortical_neurons
ASCL1	0	0.819248	0.393	0.142	0	IPs_and_early_cortical_neurons
DLL3	0	0.774394	0.39	0.157	0	IPs_and_early_cortical_neurons
TCF4	0	0.726576	0.839	0.633	0	IPs_and_early_cortical_neurons
ELAVL4	7.03556e-289	0.732154	0.611	0.347	1.75439e-284	IPs_and_early_cortical_neurons
TAGLN3	1.62315e-227	0.994145	0.635	0.387	4.04749e-223	IPs_and_early_cortical_neurons
TFAP2B	5.4001e-128	1.0347	0.201	0.088	1.34657e-123	IPs_and_early_cortical_neurons
PTN	0	3.2373	0.968	0.682	0	RGCs_early
NTRK2	0	2.4857	0.86	0.127	0	RGCs_early
GPM6B	0	2.32731	0.911	0.42	0	RGCs_early
TTYH1	0	2.06453	0.962	0.554	0	RGCs_early
CLU	0	1.99611	0.818	0.326	0	RGCs_early
EDNRB	0	1.91851	0.537	0.046	0	RGCs_early
ATP1A2	0	1.74689	0.664	0.066	0	RGCs_early
MASP1	0	1.69197	0.702	0.184	0	RGCs_early
NES	0	1.67732	0.754	0.188	0	RGCs_early
HES4	0	1.65756	0.927	0.619	0	RGCs_early
SPARC	0	1.64046	0.702	0.11	0	RGCs_early
NR2F1	0	1.60624	0.893	0.398	0	RGCs_early
SPARCL1	0	1.60395	0.259	0.019	0	RGCs_early
VIM	0	1.57879	0.999	0.975	0	RGCs_early
MGST1	0	1.47325	0.611	0.052	0	RGCs_early
PEA15	0	1.39729	0.798	0.354	0	RGCs_early
WLS	0	1.37702	0.554	0.048	0	RGCs_early
FRZB	0	1.35975	0.346	0.027	0	RGCs_early
MT3	3.73458e-301	1.5721	0.652	0.277	9.31255e-297	RGCs_early
RSPO3	8.32326e-250	1.65709	0.198	0.036	2.07549e-245	RGCs_early
TPBG	0	3.59522	0.975	0.046	0	choroid_plexus_mesenchymal_like_cells
TRH	0	3.44176	0.593	0.026	0	choroid_plexus_mesenchymal_like_cells
SPARC	0	2.65101	0.967	0.122	0	choroid_plexus_mesenchymal_like_cells
S100A11	0	2.37132	0.881	0.009	0	choroid_plexus_mesenchymal_like_cells
APOE	0	2.24846	0.778	0.054	0	choroid_plexus_mesenchymal_like_cells
WLS	0	2.20408	0.934	0.058	0	choroid_plexus_mesenchymal_like_cells
ANXA2	0	2.18806	0.938	0.116	0	choroid_plexus_mesenchymal_like_cells
SERPINF1	0	2.16074	0.794	0.009	0	choroid_plexus_mesenchymal_like_cells
SPARCL1	0	2.14927	0.658	0.023	0	choroid_plexus_mesenchymal_like_cells
PTGDS	0	2.10052	0.667	0.043	0	choroid_plexus_mesenchymal_like_cells
PLTP	0	1.94212	0.93	0.109	0	choroid_plexus_mesenchymal_like_cells
ZIC1	1.11545e-301	1.55923	0.93	0.131	2.78148e-297	choroid_plexus_mesenchymal_like_cells
PON2	1.01999e-189	1.60883	0.864	0.177	2.54345e-185	choroid_plexus_mesenchymal_like_cells
SAT1	3.01256e-182	2.32716	0.938	0.223	7.51213e-178	choroid_plexus_mesenchymal_like_cells
CLU	1.30098e-176	2.63554	0.988	0.336	3.24411e-172	choroid_plexus_mesenchymal_like_cells
MDK	2.73976e-147	2.39964	0.996	0.463	6.83188e-143	choroid_plexus_mesenchymal_like_cells
ZFP36L1	2.39404e-138	1.68527	0.967	0.316	5.96977e-134	choroid_plexus_mesenchymal_like_cells
NEAT1	2.16797e-107	1.78884	0.905	0.295	5.40604e-103	choroid_plexus_mesenchymal_like_cells
PTN	3.01839e-53	1.56787	0.967	0.688	7.52667e-49	choroid_plexus_mesenchymal_like_cells
DLK1	4.7777e-48	1.599	0.292	0.063	1.19137e-43	choroid_plexus_mesenchymal_like_cells
NDUFA4L2	0	1.50283	0.67	0.219	0	gliogenic_outer_RGCs_and_astrocytes
IGFBP2	0	1.46331	1	0.943	0	gliogenic_outer_RGCs_and_astrocytes
VIM	0	1.36156	1	0.975	0	gliogenic_outer_RGCs_and_astrocytes
ATF5	0	1.27227	0.736	0.305	0	gliogenic_outer_RGCs_and_astrocytes
DDIT4	0	1.25603	0.992	0.701	0	gliogenic_outer_RGCs_and_astrocytes
P4HA1	0	1.24595	0.895	0.381	0	gliogenic_outer_RGCs_and_astrocytes
SOX2	0	1.21353	0.952	0.444	0	gliogenic_outer_RGCs_and_astrocytes
BNIP3	0	1.15725	0.983	0.754	0	gliogenic_outer_RGCs_and_astrocytes
HILPDA	0	1.08738	0.829	0.423	0	gliogenic_outer_RGCs_and_astrocytes
ENO1	0	1.07312	0.997	0.883	0	gliogenic_outer_RGCs_and_astrocytes
AKAP12	0	1.05035	0.756	0.371	0	gliogenic_outer_RGCs_and_astrocytes
SLC16A1	0	1.01737	0.664	0.241	0	gliogenic_outer_RGCs_and_astrocytes
SLC2A1	0	1.0126	0.588	0.194	0	gliogenic_outer_RGCs_and_astrocytes
ZFP36L1	0	1.00308	0.809	0.298	0	gliogenic_outer_RGCs_and_astrocytes
FAM162A	0	0.999532	0.937	0.612	0	gliogenic_outer_RGCs_and_astrocytes
TTYH1	0	0.952743	0.938	0.549	0	gliogenic_outer_RGCs_and_astrocytes
STC2	0	0.943583	0.61	0.16	0	gliogenic_outer_RGCs_and_astrocytes
HES1	0	0.929584	0.729	0.296	0	gliogenic_outer_RGCs_and_astrocytes
PGK1	0	0.886913	0.974	0.717	0	gliogenic_outer_RGCs_and_astrocytes
SFRP1	0	0.875582	0.786	0.428	0	gliogenic_outer_RGCs_and_astrocytes
