# Supplementary material for: Brain corticogenesis and cholesterol homeostasis promotes SARS-CoV-2 infection and replication
Source: Research Square preprint supplement (doi:10.21203/rs.3.rs-2481841/v1), 2023-02-10
Supplement: Supplementary file 2 [file 94e177a5ec8602aa3d003d5e.xlsx]

## Sheet: VP&N1
	logFC	logCPM	F	p_val	p_adj	gene	cluster_id
CRYM	6.06856	5.36417	970.285	1.0622e-07	0.00148539	CRYM	ventral_progenitors_and_neurons_1
MEF2C	3.52467	7.38339	592.811	4.41536e-07	0.00231287	MEF2C	ventral_progenitors_and_neurons_1
MSRA	3.5712	6.15781	569.321	4.96182e-07	0.00231287	MSRA	ventral_progenitors_and_neurons_1
DPP10	4.22471	5.03243	342.218	2.14675e-06	0.00750505	DPP10	ventral_progenitors_and_neurons_1
GRIK2	2.48629	5.37146	247.985	5.39506e-06	0.0109518	GRIK2	ventral_progenitors_and_neurons_1
EBF2	-3.60875	4.90149	264.206	4.50239e-06	0.0109518	EBF2	ventral_progenitors_and_neurons_1
SLC17A6	-2.47069	5.31317	246.597	5.48214e-06	0.0109518	SLC17A6	ventral_progenitors_and_neurons_1
ZNF521	-2.61519	5.195	229.272	6.74729e-06	0.0117943	ZNF521	ventral_progenitors_and_neurons_1
ADAMTS3	6.28588	5.5063	214.741	8.12946e-06	0.0126314	ADAMTS3	ventral_progenitors_and_neurons_1
ZFHX4	-2.82463	7.42637	203.629	9.45478e-06	0.0132216	ZFHX4	ventral_progenitors_and_neurons_1
B3GALT2	2.2934	4.98571	184.085	1.25883e-05	0.0135485	B3GALT2	ventral_progenitors_and_neurons_1
EPHA6	2.81641	3.78201	157.322	1.9627e-05	0.0135485	EPHA6	ventral_progenitors_and_neurons_1
COL25A1	3.46591	3.75182	172.576	1.51125e-05	0.0135485	COL25A1	ventral_progenitors_and_neurons_1
EBF1	-4.26533	5.94545	162.479	1.79195e-05	0.0135485	EBF1	ventral_progenitors_and_neurons_1
GPR22	3.36727	5.38593	160.259	1.8629e-05	0.0135485	GPR22	ventral_progenitors_and_neurons_1
AL078639.1	1.78695	5.30943	155.327	2.0346e-05	0.0135485	AL078639.1	ventral_progenitors_and_neurons_1
PSD3	1.68562	6.57725	185.494	1.23193e-05	0.0135485	PSD3	ventral_progenitors_and_neurons_1
ZFHX4-AS1	-4.26537	3.69852	169.441	1.59166e-05	0.0135485	ZFHX4-AS1	ventral_progenitors_and_neurons_1
AL136366.1	5.55169	3.34352	157.545	1.95487e-05	0.0135485	AL136366.1	ventral_progenitors_and_neurons_1
MAB21L1	-3.63049	7.13016	170.32	1.56855e-05	0.0135485	MAB21L1	ventral_progenitors_and_neurons_1
AC135782.1	5.10474	3.44732	170.807	1.55593e-05	0.0135485	AC135782.1	ventral_progenitors_and_neurons_1
SAMD1	1.51225	6.6121	149.142	2.28139e-05	0.0145013	SAMD1	ventral_progenitors_and_neurons_1
DLG2	1.74115	5.67106	144.056	2.51539e-05	0.0152936	DLG2	ventral_progenitors_and_neurons_1
CRABP2	-2.21529	4.7938	140.12	2.71911e-05	0.015657	CRABP2	ventral_progenitors_and_neurons_1
SST	-4.19361	4.3486	130.38	3.32836e-05	0.015657	SST	ventral_progenitors_and_neurons_1
ADGRL3	-1.55467	5.85419	129.433	3.39705e-05	0.015657	ADGRL3	ventral_progenitors_and_neurons_1
FSTL5	-1.85295	5.51345	128.307	3.48125e-05	0.015657	FSTL5	ventral_progenitors_and_neurons_1
NPR3	5.65564	4.11759	126.995	3.58284e-05	0.015657	NPR3	ventral_progenitors_and_neurons_1
AC104964.4	3.6909	3.01767	130.072	3.35048e-05	0.015657	AC104964.4	ventral_progenitors_and_neurons_1
LPL	5.33315	4.92012	127.126	3.57251e-05	0.015657	LPL	ventral_progenitors_and_neurons_1
ST18	1.93809	5.75289	132.377	3.18949e-05	0.015657	ST18	ventral_progenitors_and_neurons_1
ZFP28	-4.97237	3.23507	136.841	2.9061e-05	0.015657	ZFP28	ventral_progenitors_and_neurons_1
DYNC1I1	2.57284	5.41637	121.751	4.03147e-05	0.0162079	DYNC1I1	ventral_progenitors_and_neurons_1
2022-09-06	-1.61667	6.04772	122.721	3.94306e-05	0.0162079	2022-09-06	ventral_progenitors_and_neurons_1
PCSK5	3.45256	4.12283	121.354	4.06843e-05	0.0162079	PCSK5	ventral_progenitors_and_neurons_1
PCP4	3.15492	5.7373	120.262	4.17251e-05	0.0162079	PCP4	ventral_progenitors_and_neurons_1
GADD45A	-2.21876	5.7494	118.731	4.32458e-05	0.0163446	GADD45A	ventral_progenitors_and_neurons_1
CCDC171	1.46673	5.65759	116.472	4.56275e-05	0.016364	CCDC171	ventral_progenitors_and_neurons_1
LMO7	2.78144	5.73619	115.41	4.68078e-05	0.016364	LMO7	ventral_progenitors_and_neurons_1
ADCYAP1	-3.16972	4.68019	116.334	4.57786e-05	0.016364	ADCYAP1	ventral_progenitors_and_neurons_1
SLCO3A1	2.07375	6.08224	114.173	4.82361e-05	0.0164521	SLCO3A1	ventral_progenitors_and_neurons_1
CNTN2	-2.19867	5.65293	99.2902	7.11137e-05	0.0202967	CNTN2	ventral_progenitors_and_neurons_1
LRP1B	2.39959	4.46933	101.341	6.71964e-05	0.0202967	LRP1B	ventral_progenitors_and_neurons_1
TLX3	-6.29549	3.07874	101.476	6.69487e-05	0.0202967	TLX3	ventral_progenitors_and_neurons_1
CDR1	3.24229	3.43073	101.873	6.62279e-05	0.0202967	CDR1	ventral_progenitors_and_neurons_1
PBX3	-3.57773	7.34603	104.107	6.23576e-05	0.0202967	PBX3	ventral_progenitors_and_neurons_1
INA	-1.74119	7.46299	99.9128	6.98925e-05	0.0202967	INA	ventral_progenitors_and_neurons_1
EBF3	-3.01033	5.58969	101.112	6.76189e-05	0.0202967	EBF3	ventral_progenitors_and_neurons_1
TDP1	2.23955	5.37047	99.2872	7.11196e-05	0.0202967	TDP1	ventral_progenitors_and_neurons_1
RPL31	1.0557	9.84074	92.2585	8.71296e-05	0.0207324	RPL31	ventral_progenitors_and_neurons_1
ITM2C	-1.68254	5.6716	92.5881	8.62761e-05	0.0207324	ITM2C	ventral_progenitors_and_neurons_1
KIF1A	1.12259	8.11816	91.0291	9.04153e-05	0.0207324	KIF1A	ventral_progenitors_and_neurons_1
CAMK2N2	-2.61231	5.4736	93.4285	8.41502e-05	0.0207324	CAMK2N2	ventral_progenitors_and_neurons_1
PAM	-1.67704	5.29267	93.0069	8.52078e-05	0.0207324	PAM	ventral_progenitors_and_neurons_1
LBX1	-4.72448	4.94068	91.7788	8.83922e-05	0.0207324	LBX1	ventral_progenitors_and_neurons_1
DLK1	-3.35892	4.68579	93.0449	8.51118e-05	0.0207324	DLK1	ventral_progenitors_and_neurons_1
ZNF423	-2.09353	4.23914	91.9914	8.78297e-05	0.0207324	ZNF423	ventral_progenitors_and_neurons_1
MT2A	2.33733	4.07113	96.494	7.69659e-05	0.0207324	MT2A	ventral_progenitors_and_neurons_1
EPN2	1.2473	6.71777	91.9325	8.79852e-05	0.0207324	EPN2	ventral_progenitors_and_neurons_1
HOXB2	-5.88816	4.04728	97.5535	7.46748e-05	0.0207324	HOXB2	ventral_progenitors_and_neurons_1
KCNG1	3.67488	5.83432	91.0211	9.04373e-05	0.0207324	KCNG1	ventral_progenitors_and_neurons_1
RGS4	-3.95919	2.99924	87.3216	0.000101391	0.0211806	RGS4	ventral_progenitors_and_neurons_1
EN1	-9.96331	3.50584	137.45	9.98037e-05	0.0211806	EN1	ventral_progenitors_and_neurons_1
MIR124-2HG	-1.93008	6.53407	87.5427	0.000100687	0.0211806	MIR124-2HG	ventral_progenitors_and_neurons_1
NTM	1.22435	7.73655	87.9796	9.9317e-05	0.0211806	NTM	ventral_progenitors_and_neurons_1
MROH8	1.76239	4.42746	87.2936	0.00010148	0.0211806	MROH8	ventral_progenitors_and_neurons_1
ZNF350	-3.08773	3.37605	87.6307	0.000100409	0.0211806	ZNF350	ventral_progenitors_and_neurons_1
PCDH10	-1.46963	4.99276	83.5354	0.000114529	0.0222441	PCDH10	ventral_progenitors_and_neurons_1
DACH1	-1.53191	6.54448	83.7389	0.000113767	0.0222441	DACH1	ventral_progenitors_and_neurons_1
JPH4	1.15579	7.87722	84.1006	0.000112428	0.0222441	JPH4	ventral_progenitors_and_neurons_1
SCG5	-1.97542	6.44285	83.7438	0.000113748	0.0222441	SCG5	ventral_progenitors_and_neurons_1
DOK6	1.68778	6.17324	84.4179	0.000111271	0.0222441	DOK6	ventral_progenitors_and_neurons_1
FSIP2	-1.89991	5.09719	82.6757	0.000117827	0.0224088	FSIP2	ventral_progenitors_and_neurons_1
NELL2	1.17536	6.81708	82.4835	0.000118582	0.0224088	NELL2	ventral_progenitors_and_neurons_1
SHROOM2	-3.03732	3.64416	81.2099	0.000123752	0.023074	SHROOM2	ventral_progenitors_and_neurons_1
GNB4	1.4915	4.82672	80.5488	0.000126555	0.0232861	GNB4	ventral_progenitors_and_neurons_1
LCORL	1.26476	6.70619	79.8274	0.000129713	0.0235571	LCORL	ventral_progenitors_and_neurons_1
GREB1	-3.25985	2.99695	79.3265	0.000131967	0.0236593	GREB1	ventral_progenitors_and_neurons_1
LINC00599	1.29465	6.47955	78.8028	0.000134381	0.0237871	LINC00599	ventral_progenitors_and_neurons_1
FNDC5	-2.38218	4.61843	78.0639	0.000137889	0.0240248	FNDC5	ventral_progenitors_and_neurons_1
PUS7L	-11.9526	5.35012	118.424	0.000141352	0.0240248	PUS7L	ventral_progenitors_and_neurons_1
SYT1	1.19341	8.99019	77.1113	0.000142596	0.0240248	SYT1	ventral_progenitors_and_neurons_1
AC124283.1	2.17142	3.88161	77.7541	0.000139397	0.0240248	AC124283.1	ventral_progenitors_and_neurons_1
S100A13	-2.07067	4.21314	76.4495	0.000145993	0.0243043	S100A13	ventral_progenitors_and_neurons_1
ARHGAP20	2.50492	3.47921	74.8628	0.000154594	0.0251377	ARHGAP20	ventral_progenitors_and_neurons_1
NDUFA4L2	2.72972	6.23369	75.1464	0.000153008	0.0251377	NDUFA4L2	ventral_progenitors_and_neurons_1
TMEFF2	-2.07148	5.19449	74.1495	0.000158683	0.0252162	TMEFF2	ventral_progenitors_and_neurons_1
DTD1	-1.18237	7.06781	74.2833	0.000157905	0.0252162	DTD1	ventral_progenitors_and_neurons_1
ONECUT2	-2.0882	5.87405	72.8761	0.000166351	0.0258473	ONECUT2	ventral_progenitors_and_neurons_1
ZNF738	-1.35342	6.10351	73.0232	0.000165441	0.0258473	ZNF738	ventral_progenitors_and_neurons_1
ST8SIA4	-1.88927	4.6063	72.4752	0.000168869	0.0259037	ST8SIA4	ventral_progenitors_and_neurons_1
TSHZ2	-1.46881	5.69588	72.2322	0.000170419	0.0259037	TSHZ2	ventral_progenitors_and_neurons_1
KCNK12	1.73517	3.90025	71.8994	0.000172574	0.0259492	KCNK12	ventral_progenitors_and_neurons_1
CHD3	1.21993	7.8095	71.1683	0.000177438	0.0263968	CHD3	ventral_progenitors_and_neurons_1
NCOA7	1.36041	5.46647	70.7485	0.000180314	0.0265423	NCOA7	ventral_progenitors_and_neurons_1
AC007563.2	4.95961	1.52546	70.4066	0.000182704	0.0266139	AC007563.2	ventral_progenitors_and_neurons_1
KAZN	1.32258	6.71374	69.2194	0.000191338	0.02726	KAZN	ventral_progenitors_and_neurons_1
NLGN1	1.07839	6.45807	69.0008	0.000192988	0.02726	NLGN1	ventral_progenitors_and_neurons_1
GFRA1	-3.02075	4.07779	69.1752	0.00019167	0.02726	GFRA1	ventral_progenitors_and_neurons_1
RIMS2	-1.48635	4.80043	68.2909	0.000198478	0.0274114	RIMS2	ventral_progenitors_and_neurons_1
NDRG2	1.4074	4.41031	68.3024	0.000198387	0.0274114	NDRG2	ventral_progenitors_and_neurons_1
KCTD13	-1.57444	4.61771	67.8615	0.0002019	0.0274114	KCTD13	ventral_progenitors_and_neurons_1
GAS2L1	2.60928	3.11568	67.9986	0.000200798	0.0274114	GAS2L1	ventral_progenitors_and_neurons_1
MEIS1	-3.71401	5.91463	67.6037	0.000203993	0.0274292	MEIS1	ventral_progenitors_and_neurons_1
LINC00623	-2.27753	3.82777	65.7283	0.000220134	0.0276603	LINC00623	ventral_progenitors_and_neurons_1
NHLH1	-1.27447	5.62326	63.914	0.000237425	0.0276603	NHLH1	ventral_progenitors_and_neurons_1
GREM2	-1.88579	3.66057	62.2287	0.000255161	0.0276603	GREM2	ventral_progenitors_and_neurons_1
TMEM163	-1.28168	5.3315	64.3284	0.000233318	0.0276603	TMEM163	ventral_progenitors_and_neurons_1
CD200	-1.41498	5.8503	64.6087	0.000230596	0.0276603	CD200	ventral_progenitors_and_neurons_1
RAB3C	-1.85983	5.57955	65.3889	0.000223237	0.0276603	RAB3C	ventral_progenitors_and_neurons_1
CDO1	-1.37084	5.02799	65.4521	0.000222654	0.0276603	CDO1	ventral_progenitors_and_neurons_1
CCNG1	-1.34468	5.65168	64.8399	0.000228381	0.0276603	CCNG1	ventral_progenitors_and_neurons_1
MDGA1	-2.08396	4.14978	63.9056	0.000237509	0.0276603	MDGA1	ventral_progenitors_and_neurons_1
RUNDC3B	-1.20685	5.13358	64.7725	0.000229024	0.0276603	RUNDC3B	ventral_progenitors_and_neurons_1
MEST	-3.10143	6.22817	66.6629	0.000211884	0.0276603	MEST	ventral_progenitors_and_neurons_1
KLHL13	-2.20826	3.69029	63.6613	0.000239977	0.0276603	KLHL13	ventral_progenitors_and_neurons_1
PUM3	1.2536	6.18837	66.305	0.000214994	0.0276603	PUM3	ventral_progenitors_and_neurons_1
LRRC4C	-1.86623	5.48424	62.3748	0.000253554	0.0276603	LRRC4C	ventral_progenitors_and_neurons_1
CLMP	-1.44522	5.43457	66.4182	0.000214003	0.0276603	CLMP	ventral_progenitors_and_neurons_1
LHFPL6	-1.53184	4.16572	62.9185	0.000247693	0.0276603	LHFPL6	ventral_progenitors_and_neurons_1
VAT1L	-2.48968	3.17383	64.8737	0.00022806	0.0276603	VAT1L	ventral_progenitors_and_neurons_1
PLCG2	2.07894	6.16141	63.0598	0.0002462	0.0276603	PLCG2	ventral_progenitors_and_neurons_1
WFDC2	-1.83911	4.02116	62.3794	0.000253504	0.0276603	WFDC2	ventral_progenitors_and_neurons_1
ADARB1	1.44965	4.2667	64.0997	0.000235573	0.0276603	ADARB1	ventral_progenitors_and_neurons_1
DVL1	1.44594	4.79084	60.4645	0.000275689	0.0280606	DVL1	ventral_progenitors_and_neurons_1
FOXJ3	1.06842	5.44918	61.4159	0.000264354	0.0280606	FOXJ3	ventral_progenitors_and_neurons_1
MAPK10	-1.33699	7.32597	60.9121	0.000270277	0.0280606	MAPK10	ventral_progenitors_and_neurons_1
WDR70	1.37508	5.9471	60.5441	0.000274716	0.0280606	WDR70	ventral_progenitors_and_neurons_1
COL12A1	4.42052	1.3286	60.9219	0.00027016	0.0280606	COL12A1	ventral_progenitors_and_neurons_1
CUX2	-3.89516	3.35049	60.2029	0.00027892	0.0280606	CUX2	ventral_progenitors_and_neurons_1
TXNDC16	1.07621	5.50157	60.4603	0.000275741	0.0280606	TXNDC16	ventral_progenitors_and_neurons_1
ZFHX3	-2.03197	7.42837	60.2063	0.000278878	0.0280606	ZFHX3	ventral_progenitors_and_neurons_1
LINC00672	-1.83369	4.75516	60.692	0.00027292	0.0280606	LINC00672	ventral_progenitors_and_neurons_1
HOXB-AS1	-3.59648	2.6886	60.7506	0.000272213	0.0280606	HOXB-AS1	ventral_progenitors_and_neurons_1
CMIP	-1.00547	6.358	59.9146	0.000282541	0.0280649	CMIP	ventral_progenitors_and_neurons_1
LGALS3BP	-1.4728	4.68547	59.8802	0.000282977	0.0280649	LGALS3BP	ventral_progenitors_and_neurons_1
ACAA1	1.16137	5.69677	59.6896	0.00028541	0.0281068	ACAA1	ventral_progenitors_and_neurons_1
CXXC5	-1.87624	6.25551	59.2342	0.000291337	0.0282921	CXXC5	ventral_progenitors_and_neurons_1
CACNA1G	-2.58875	3.06614	59.3034	0.000290426	0.0282921	CACNA1G	ventral_progenitors_and_neurons_1
LZTR1	1.26063	4.64226	59.0666	0.00029356	0.0283113	LZTR1	ventral_progenitors_and_neurons_1
C2orf49	1.29515	5.70078	58.7783	0.000297439	0.028489	C2orf49	ventral_progenitors_and_neurons_1
SOX11	-1.01479	9.7228	58.086	0.000307036	0.0286647	SOX11	ventral_progenitors_and_neurons_1
CTTNBP2	1.90072	7.05377	57.9114	0.000309523	0.0286647	CTTNBP2	ventral_progenitors_and_neurons_1
AL049840.1	1.37613	4.85942	58.1772	0.000305748	0.0286647	AL049840.1	ventral_progenitors_and_neurons_1
SEZ6	1.46703	5.90142	58.078	0.00030715	0.0286647	SEZ6	ventral_progenitors_and_neurons_1
WSB2	-1.07991	5.96971	57.5892	0.000314182	0.0289047	WSB2	ventral_progenitors_and_neurons_1
HLA-DPB1	-3.62737	3.1381	57.1358	0.0003209	0.0289514	HLA-DPB1	ventral_progenitors_and_neurons_1
VSNL1	2.43523	5.13456	56.4448	0.000331514	0.029555	VSNL1	ventral_progenitors_and_neurons_1
FAM221A	-1.42999	4.18781	56.4255	0.000331818	0.029555	FAM221A	ventral_progenitors_and_neurons_1
RNF11	-1.02184	5.5826	55.8812	0.000340525	0.029587	RNF11	ventral_progenitors_and_neurons_1
FALEC	1.62547	3.99031	56.1552	0.000336103	0.029587	FALEC	ventral_progenitors_and_neurons_1
FADS3	1.20217	4.95941	56.133	0.000336459	0.029587	FADS3	ventral_progenitors_and_neurons_1
DEGS2	2.17592	3.17148	55.8741	0.00034064	0.029587	DEGS2	ventral_progenitors_and_neurons_1
CXXC4	-2.83001	5.3808	55.4879	0.000347007	0.0297702	CXXC4	ventral_progenitors_and_neurons_1
TLN1	1.3062	4.34028	55.5066	0.000346696	0.0297702	TLN1	ventral_progenitors_and_neurons_1
SNCG	-3.14044	4.21229	55.2025	0.000351815	0.0299987	SNCG	ventral_progenitors_and_neurons_1
SPHK2	1.11516	5.02963	54.6617	0.000361176	0.0302436	SPHK2	ventral_progenitors_and_neurons_1
ID3	-3.20649	2.37029	48.8588	0.000486452	0.0305257	ID3	ventral_progenitors_and_neurons_1
SNRNP40	-1.0891	5.4829	48.5768	0.000493941	0.0305257	SNRNP40	ventral_progenitors_and_neurons_1
MARCKSL1	-1.20565	10.0508	52.6314	0.000399461	0.0305257	MARCKSL1	ventral_progenitors_and_neurons_1
ADGRL2	-1.54348	4.32376	48.8252	0.000487336	0.0305257	ADGRL2	ventral_progenitors_and_neurons_1
AKT3	1.11958	6.78684	50.3633	0.000448971	0.0305257	AKT3	ventral_progenitors_and_neurons_1
FAM84A	-2.18392	4.39978	49.0096	0.000482508	0.0305257	FAM84A	ventral_progenitors_and_neurons_1
LINC01122	1.31289	6.15046	52.0387	0.000411661	0.0305257	LINC01122	ventral_progenitors_and_neurons_1
RGPD5	-1.71543	3.91678	52.5178	0.000401763	0.0305257	RGPD5	ventral_progenitors_and_neurons_1
RBMS3	-2.75099	4.46896	53.7867	0.000377043	0.0305257	RBMS3	ventral_progenitors_and_neurons_1
ACVR2B	-1.57822	6.46557	50.1436	0.000454197	0.0305257	ACVR2B	ventral_progenitors_and_neurons_1
CSPG5	-1.37362	4.43373	52.3228	0.000405751	0.0305257	CSPG5	ventral_progenitors_and_neurons_1
PDZRN3	-2.12365	3.99145	54.1247	0.000370805	0.0305257	PDZRN3	ventral_progenitors_and_neurons_1
DCBLD2	-1.67099	4.91144	50.968	0.000435001	0.0305257	DCBLD2	ventral_progenitors_and_neurons_1
AC092691.1	1.84661	4.40944	49.2764	0.00047564	0.0305257	AC092691.1	ventral_progenitors_and_neurons_1
MGLL	2.8797	4.62071	48.8698	0.000486164	0.0305257	MGLL	ventral_progenitors_and_neurons_1
RPL39L	-1.09285	4.94186	49.2558	0.000476164	0.0305257	RPL39L	ventral_progenitors_and_neurons_1
AC116565.1	1.41762	4.00062	50.1039	0.000455149	0.0305257	AC116565.1	ventral_progenitors_and_neurons_1
CDH10	-2.09392	3.36785	51.983	0.000412833	0.0305257	CDH10	ventral_progenitors_and_neurons_1
RAD50	1.72174	3.42441	48.7373	0.000489658	0.0305257	RAD50	ventral_progenitors_and_neurons_1
PRPF4B	1.0482	6.9289	53.1742	0.000388712	0.0305257	PRPF4B	ventral_progenitors_and_neurons_1
HLA-B	-1.43698	4.99378	50.126	0.000454619	0.0305257	HLA-B	ventral_progenitors_and_neurons_1
CDKN1A	-3.46383	3.33088	48.9711	0.000483511	0.0305257	CDKN1A	ventral_progenitors_and_neurons_1
FRS3	-1.89496	3.53906	51.7719	0.000417316	0.0305257	FRS3	ventral_progenitors_and_neurons_1
KCNQ5	4.11262	1.48173	49.7519	0.000463718	0.0305257	KCNQ5	ventral_progenitors_and_neurons_1
POU6F2	-3.36609	2.74529	49.8179	0.000462096	0.0305257	POU6F2	ventral_progenitors_and_neurons_1
SLC26A4	3.51952	1.83864	49.905	0.000459965	0.0305257	SLC26A4	ventral_progenitors_and_neurons_1
TCEAL7	-1.95099	6.77206	48.5009	0.000495981	0.0305257	TCEAL7	ventral_progenitors_and_neurons_1
NEFL	-2.3121	7.14124	48.6783	0.000491226	0.0305257	NEFL	ventral_progenitors_and_neurons_1
C8orf34	3.5685	3.02714	49.3149	0.000474659	0.0305257	C8orf34	ventral_progenitors_and_neurons_1
NOV	2.46851	2.99176	51.6281	0.000420408	0.0305257	NOV	ventral_progenitors_and_neurons_1
CA9	3.81201	4.6546	51.021	0.000433803	0.0305257	CA9	ventral_progenitors_and_neurons_1
NAV2-AS3	1.85968	3.93379	48.9321	0.000484529	0.0305257	NAV2-AS3	ventral_progenitors_and_neurons_1
SESN3	1.2213	5.35419	53.466	0.000383094	0.0305257	SESN3	ventral_progenitors_and_neurons_1
GRIA4	-2.48476	5.38119	49.5387	0.000469012	0.0305257	GRIA4	ventral_progenitors_and_neurons_1
CRYAB	2.08998	3.11919	51.5421	0.000422271	0.0305257	CRYAB	ventral_progenitors_and_neurons_1
UPF2	1.03781	6.90828	53.3021	0.000386235	0.0305257	UPF2	ventral_progenitors_and_neurons_1
TNS2	1.27674	4.35419	49.2481	0.000476363	0.0305257	TNS2	ventral_progenitors_and_neurons_1
SIAH3	2.01819	3.02844	49.587	0.000467805	0.0305257	SIAH3	ventral_progenitors_and_neurons_1
MAGEL2	-2.17162	3.55491	52.4899	0.00040233	0.0305257	MAGEL2	ventral_progenitors_and_neurons_1
NUP93	-1.39424	5.66772	53.2314	0.000387601	0.0305257	NUP93	ventral_progenitors_and_neurons_1
NDRG4	-1.01518	5.75542	48.6253	0.000492641	0.0305257	NDRG4	ventral_progenitors_and_neurons_1
CES4A	1.22245	5.18353	52.566	0.000400784	0.0305257	CES4A	ventral_progenitors_and_neurons_1
CBFA2T3	-1.55985	4.31987	49.5126	0.000469667	0.0305257	CBFA2T3	ventral_progenitors_and_neurons_1
THRA	1.19056	7.096	52.3907	0.000404357	0.0305257	THRA	ventral_progenitors_and_neurons_1
RBFA	1.07432	6.05352	49.585	0.000467857	0.0305257	RBFA	ventral_progenitors_and_neurons_1
DNMT3B	-3.23983	3.73325	49.9014	0.000460053	0.0305257	DNMT3B	ventral_progenitors_and_neurons_1
BLCAP	-1.22698	7.0074	48.4373	0.000497701	0.0305257	BLCAP	ventral_progenitors_and_neurons_1
NFIX	5.31679	6.15387	51.6867	0.000419145	0.0305257	NFIX	ventral_progenitors_and_neurons_1
ATF5	1.03555	6.94183	50.0702	0.00045596	0.0305257	ATF5	ventral_progenitors_and_neurons_1
MN1	-1.53892	4.77495	53.1104	0.000389956	0.0305257	MN1	ventral_progenitors_and_neurons_1
SLC16A14	-1.16189	4.76407	47.9548	0.000511016	0.0306019	SLC16A14	ventral_progenitors_and_neurons_1
TMEM128	-1.21322	4.79824	48.0234	0.000509093	0.0306019	TMEM128	ventral_progenitors_and_neurons_1
SPOCK3	-2.66533	3.40977	47.9999	0.000509749	0.0306019	SPOCK3	ventral_progenitors_and_neurons_1
CD24	-1.88751	8.75113	47.9171	0.000512074	0.0306019	CD24	ventral_progenitors_and_neurons_1
DCX	-1.15727	8.66885	48.1323	0.000506061	0.0306019	DCX	ventral_progenitors_and_neurons_1
NECAB1	1.81903	4.15	48.2252	0.000503495	0.0306019	NECAB1	ventral_progenitors_and_neurons_1
BAIAP2-DT	1.5455	5.12553	47.7422	0.000517032	0.0307667	BAIAP2-DT	ventral_progenitors_and_neurons_1
LMO2	-1.50638	4.89043	47.4885	0.00052434	0.0308083	LMO2	ventral_progenitors_and_neurons_1
KIF26A	2.13571	4.36772	47.5149	0.000523573	0.0308083	KIF26A	ventral_progenitors_and_neurons_1
CDH7	1.17698	5.8372	47.3665	0.000527901	0.0308877	CDH7	ventral_progenitors_and_neurons_1
FXYD7	-1.41998	5.69326	47.0703	0.000536689	0.0312711	FXYD7	ventral_progenitors_and_neurons_1
SLC26A4-AS1	5.60941	1.77072	46.831	0.000543931	0.031522	SLC26A4-AS1	ventral_progenitors_and_neurons_1
AP1S2	-1.72604	6.69478	46.7796	0.000545504	0.031522	AP1S2	ventral_progenitors_and_neurons_1
MAB21L2	-6.21034	5.01625	46.462	0.000555362	0.0318286	MAB21L2	ventral_progenitors_and_neurons_1
CSAD	1.05415	6.59771	46.526	0.000553356	0.0318286	CSAD	ventral_progenitors_and_neurons_1
NUPR1	4.65001	2.67711	46.3666	0.000558368	0.0318703	NUPR1	ventral_progenitors_and_neurons_1
NDN	-1.05232	7.49001	45.9534	0.000571647	0.0324956	NDN	ventral_progenitors_and_neurons_1
EPHA8	-1.77235	3.43402	45.8468	0.000575142	0.0325031	EPHA8	ventral_progenitors_and_neurons_1
PCBP4	-1.00856	6.08991	45.648	0.000581737	0.0325241	PCBP4	ventral_progenitors_and_neurons_1
SMIM18	-1.62563	4.79064	45.4932	0.000586942	0.0325241	SMIM18	ventral_progenitors_and_neurons_1
WRN	1.44751	5.03871	45.6759	0.000580805	0.0325241	WRN	ventral_progenitors_and_neurons_1
AC027288.3	2.30872	4.37839	45.4691	0.000587759	0.0325241	AC027288.3	ventral_progenitors_and_neurons_1
BCAP29	1.18032	5.29768	45.1343	0.000599255	0.0326258	BCAP29	ventral_progenitors_and_neurons_1
FLNA	1.02374	5.38506	44.8591	0.000608934	0.0326258	FLNA	ventral_progenitors_and_neurons_1
PPP1R1A	-2.58932	6.32362	44.9352	0.000606235	0.0326258	PPP1R1A	ventral_progenitors_and_neurons_1
AL133367.1	2.63243	2.57305	45.0465	0.000602319	0.0326258	AL133367.1	ventral_progenitors_and_neurons_1
MEIS2	-1.65694	9.44205	45.0306	0.000602878	0.0326258	MEIS2	ventral_progenitors_and_neurons_1
C1QL1	-1.49387	4.2026	44.8623	0.00060882	0.0326258	C1QL1	ventral_progenitors_and_neurons_1
ERBB4	-2.20622	4.8471	44.2243	0.000632072	0.0326846	ERBB4	ventral_progenitors_and_neurons_1
AC007938.3	-2.92077	3.34408	44.6866	0.000615108	0.0326846	AC007938.3	ventral_progenitors_and_neurons_1
IKBKB	1.364	4.55434	44.6018	0.000618171	0.0326846	IKBKB	ventral_progenitors_and_neurons_1
VWA5A	-2.30352	3.98787	44.2063	0.000632744	0.0326846	VWA5A	ventral_progenitors_and_neurons_1
FGF14	-1.35695	4.95646	44.1887	0.000633405	0.0326846	FGF14	ventral_progenitors_and_neurons_1
FAM155A	-1.24508	4.99454	44.2715	0.00063031	0.0326846	FAM155A	ventral_progenitors_and_neurons_1
ST8SIA3	-1.64923	3.52102	44.2433	0.000631361	0.0326846	ST8SIA3	ventral_progenitors_and_neurons_1
DDC	-8.16372	1.93857	61.4934	0.000637799	0.0327904	DDC	ventral_progenitors_and_neurons_1
GAS7	1.80825	3.91917	43.9709	0.000641636	0.0328668	GAS7	ventral_progenitors_and_neurons_1
ZNF618	-1.04952	5.74934	43.8543	0.000646106	0.032975	ZNF618	ventral_progenitors_and_neurons_1
TTLL7	1.10375	6.68959	42.6418	0.000695135	0.0331823	TTLL7	ventral_progenitors_and_neurons_1
GALNT13	1.41031	3.82077	42.5883	0.000697415	0.0331823	GALNT13	ventral_progenitors_and_neurons_1
TRNT1	1.07588	4.61273	42.8072	0.00068816	0.0331823	TRNT1	ventral_progenitors_and_neurons_1
HYAL2	-1.20826	5.11827	42.4587	0.00070297	0.0331823	HYAL2	ventral_progenitors_and_neurons_1
CACNA2D2	-1.80694	4.00416	42.8357	0.000686967	0.0331823	CACNA2D2	ventral_progenitors_and_neurons_1
FGFR3	2.01469	2.76535	42.5899	0.000697345	0.0331823	FGFR3	ventral_progenitors_and_neurons_1
STK32B	-3.59996	2.42083	42.9942	0.000680384	0.0331823	STK32B	ventral_progenitors_and_neurons_1
SHTN1	1.66205	6.87556	43.0116	0.000679668	0.0331823	SHTN1	ventral_progenitors_and_neurons_1
NTN4	-5.40438	2.32108	42.6696	0.000693957	0.0331823	NTN4	ventral_progenitors_and_neurons_1
PRKCB	-1.38998	5.12092	42.7026	0.000692561	0.0331823	PRKCB	ventral_progenitors_and_neurons_1
RNF213	1.2207	4.2971	43.0557	0.000677853	0.0331823	RNF213	ventral_progenitors_and_neurons_1
VSTM2B	-1.79685	4.18018	42.4606	0.00070289	0.0331823	VSTM2B	ventral_progenitors_and_neurons_1
MYADM	-2.08035	4.45587	43.4878	0.00066042	0.0331823	MYADM	ventral_progenitors_and_neurons_1
MSI1	-1.09861	5.06114	42.3499	0.000707684	0.0331999	MSI1	ventral_progenitors_and_neurons_1
KLHDC9	-1.84984	3.89626	42.1366	0.000717045	0.0334238	KLHDC9	ventral_progenitors_and_neurons_1
CNRIP1	-1.12521	4.93039	41.983	0.00072389	0.0334581	CNRIP1	ventral_progenitors_and_neurons_1
SFRP2	-3.17446	3.23378	41.9592	0.000724956	0.0334581	SFRP2	ventral_progenitors_and_neurons_1
IPCEF1	2.71026	2.09964	42.0484	0.000720964	0.0334581	IPCEF1	ventral_progenitors_and_neurons_1
AL356488.3	1.64991	3.4504	41.8318	0.000730712	0.0335102	AL356488.3	ventral_progenitors_and_neurons_1
GPRASP2	-1.35181	4.58135	41.8281	0.000730878	0.0335102	GPRASP2	ventral_progenitors_and_neurons_1
RIMS3	-1.27053	4.45047	41.533	0.000744454	0.0339025	RIMS3	ventral_progenitors_and_neurons_1
HSPA6	2.3906	2.7143	41.3814	0.000751556	0.0339025	HSPA6	ventral_progenitors_and_neurons_1
RND2	-1.77044	5.41797	41.4278	0.000749375	0.0339025	RND2	ventral_progenitors_and_neurons_1
AC008735.2	2.43944	2.5549	41.403	0.000750539	0.0339025	AC008735.2	ventral_progenitors_and_neurons_1
CCDC115	-1.20033	5.52298	41.2142	0.000759499	0.0339278	CCDC115	ventral_progenitors_and_neurons_1
ADRA2C	3.09652	2.70314	41.2463	0.000757966	0.0339278	ADRA2C	ventral_progenitors_and_neurons_1
TPBG	-2.75943	4.21863	41.1429	0.000762922	0.0339278	TPBG	ventral_progenitors_and_neurons_1
AC124068.2	1.91057	3.27939	41.3136	0.000754764	0.0339278	AC124068.2	ventral_progenitors_and_neurons_1
MYO5B	3.11021	3.47884	41.1153	0.000764249	0.0339278	MYO5B	ventral_progenitors_and_neurons_1
R3HDM1	1.09524	6.03371	41.0271	0.000768522	0.0340095	R3HDM1	ventral_progenitors_and_neurons_1
PLOD1	1.53971	4.02134	39.7981	0.000831513	0.0340197	PLOD1	ventral_progenitors_and_neurons_1
AC245297.3	-1.14318	5.62666	40.0736	0.000816803	0.0340197	AC245297.3	ventral_progenitors_and_neurons_1
ATP6V1E2	1.51242	4.63649	40.5829	0.000790522	0.0340197	ATP6V1E2	ventral_progenitors_and_neurons_1
ATP6V1G2	-1.48192	5.9981	40.8301	0.000778176	0.0340197	ATP6V1G2	ventral_progenitors_and_neurons_1
MDFI	2.14617	4.33434	39.9672	0.000822443	0.0340197	MDFI	ventral_progenitors_and_neurons_1
ELAVL2	-1.30518	6.94864	39.7806	0.000832458	0.0340197	ELAVL2	ventral_progenitors_and_neurons_1
SEMA4D	1.36482	5.02663	39.8278	0.000829907	0.0340197	SEMA4D	ventral_progenitors_and_neurons_1
CDKN1C	-2.67966	6.16961	40.2315	0.000808535	0.0340197	CDKN1C	ventral_progenitors_and_neurons_1
LGR4	-2.41132	2.93097	39.7307	0.000835165	0.0340197	LGR4	ventral_progenitors_and_neurons_1
H2AFY2	-1.28512	6.47496	39.7375	0.000834797	0.0340197	H2AFY2	ventral_progenitors_and_neurons_1
RBFOX1	-2.41038	3.93915	39.7154	0.000835996	0.0340197	RBFOX1	ventral_progenitors_and_neurons_1
EFNB3	-1.21503	5.51501	40.8704	0.000776185	0.0340197	EFNB3	ventral_progenitors_and_neurons_1
VAMP2	-1.24779	8.81372	40.0138	0.000819968	0.0340197	VAMP2	ventral_progenitors_and_neurons_1
AC005921.2	1.13215	4.54814	40.0449	0.000818318	0.0340197	AC005921.2	ventral_progenitors_and_neurons_1
CYGB	-1.54448	3.84909	40.8163	0.000778856	0.0340197	CYGB	ventral_progenitors_and_neurons_1
AC010336.3	1.85354	3.0817	40.4469	0.000797427	0.0340197	AC010336.3	ventral_progenitors_and_neurons_1
ZCCHC12	-1.47854	4.69969	39.3666	0.00085527	0.0345668	ZCCHC12	ventral_progenitors_and_neurons_1
PLXNC1	-2.03931	3.55682	39.2285	0.00086307	0.0346815	PLXNC1	ventral_progenitors_and_neurons_1
ST8SIA1	-1.20182	5.29846	39.0589	0.000872776	0.0349711	ST8SIA1	ventral_progenitors_and_neurons_1
NSUN6	1.3329	6.68381	38.8994	0.000882038	0.035041	NSUN6	ventral_progenitors_and_neurons_1
AL033530.1	3.24717	1.48058	38.8082	0.000887393	0.0350545	AL033530.1	ventral_progenitors_and_neurons_1
AL627171.2	2.73364	1.93073	38.8435	0.000885314	0.0350545	AL627171.2	ventral_progenitors_and_neurons_1
CCDC184	-1.26945	5.19569	38.6063	0.000899409	0.0352311	CCDC184	ventral_progenitors_and_neurons_1
KNOP1	1.09971	6.87064	38.4395	0.0009095	0.0352311	KNOP1	ventral_progenitors_and_neurons_1
ZNF506	-2.09208	2.9481	38.4973	0.000905985	0.0352311	ZNF506	ventral_progenitors_and_neurons_1
GPR137C	-1.0759	4.85218	38.2073	0.000923802	0.0356863	GPR137C	ventral_progenitors_and_neurons_1
ADGRB3	1.21434	6.27517	38.0884	0.000931238	0.0357871	ADGRB3	ventral_progenitors_and_neurons_1
TH	-5.37357	3.08751	37.994	0.000937204	0.0359065	TH	ventral_progenitors_and_neurons_1
FBXO41	1.1933	3.93556	37.8441	0.000946779	0.0360756	FBXO41	ventral_progenitors_and_neurons_1
RAB13	1.11039	5.56522	37.6588	0.000958801	0.0361867	RAB13	ventral_progenitors_and_neurons_1
RGS7	1.50228	4.6675	37.2898	0.000983363	0.0361867	RGS7	ventral_progenitors_and_neurons_1
ZNF502	-7.8734	1.69671	50.7221	0.000983104	0.0361867	ZNF502	ventral_progenitors_and_neurons_1
CASP3	-1.08536	5.4207	37.3752	0.0009776	0.0361867	CASP3	ventral_progenitors_and_neurons_1
EIF4EBP1	1.0428	6.76977	37.2533	0.000985835	0.0361867	EIF4EBP1	ventral_progenitors_and_neurons_1
LPIN2	1.12706	5.69591	37.7115	0.000955366	0.0361867	LPIN2	ventral_progenitors_and_neurons_1
LAMP5	-5.46318	6.91541	37.539	0.000966686	0.0361867	LAMP5	ventral_progenitors_and_neurons_1
NFIC	1.24421	5.51155	37.5724	0.000964482	0.0361867	NFIC	ventral_progenitors_and_neurons_1
WTIP	-1.38875	4.09783	37.6091	0.000962063	0.0361867	WTIP	ventral_progenitors_and_neurons_1
BRD9	1.03566	7.26735	36.7312	0.00102217	0.0366515	BRD9	ventral_progenitors_and_neurons_1
TSC22D3	-1.02135	5.05895	36.7415	0.00102144	0.0366515	TSC22D3	ventral_progenitors_and_neurons_1
FAM241B	-1.22802	5.56904	36.793	0.00101778	0.0366515	FAM241B	ventral_progenitors_and_neurons_1
FAM222A	-2.42189	2.94833	36.7862	0.00101826	0.0366515	FAM222A	ventral_progenitors_and_neurons_1
NAALADL2-AS2	-5.10004	2.04568	36.6401	0.0010287	0.0366902	NAALADL2-AS2	ventral_progenitors_and_neurons_1
NLGN4X	-1.20531	4.38761	36.6538	0.00102771	0.0366902	NLGN4X	ventral_progenitors_and_neurons_1
KIAA1211L	3.87317	1.31167	36.3337	0.00105105	0.0369964	KIAA1211L	ventral_progenitors_and_neurons_1
IGFBP5	4.13618	8.15502	36.3058	0.00105312	0.0369964	IGFBP5	ventral_progenitors_and_neurons_1
CYP26A1	-10.4854	3.97737	49.1442	0.00105487	0.0369964	CYP26A1	ventral_progenitors_and_neurons_1
PRRT4	-1.94244	2.90629	36.1205	0.001067	0.0371095	PRRT4	ventral_progenitors_and_neurons_1
SIPA1L1	2.20727	4.63809	36.1575	0.00106421	0.0371095	SIPA1L1	ventral_progenitors_and_neurons_1
CASZ1	-1.71504	3.4732	35.8994	0.00108387	0.0371809	CASZ1	ventral_progenitors_and_neurons_1
CACNG2	-1.56518	3.52998	35.9919	0.00107677	0.0371809	CACNG2	ventral_progenitors_and_neurons_1
CNTN3	2.19333	2.52257	35.7276	0.00109724	0.0372924	CNTN3	ventral_progenitors_and_neurons_1
CCSER1	1.17176	5.38592	35.7242	0.00109751	0.0372924	CCSER1	ventral_progenitors_and_neurons_1
MARCKS	-1.08317	10.1966	35.7088	0.00109872	0.0372924	MARCKS	ventral_progenitors_and_neurons_1
POU2F2	-1.21544	7.31928	35.6231	0.00110548	0.0373407	POU2F2	ventral_progenitors_and_neurons_1
MAGI1	-1.04898	6.19719	35.5585	0.00111061	0.0374236	MAGI1	ventral_progenitors_and_neurons_1
MYO1B	-1.20333	4.08901	35.4477	0.00111949	0.0376251	MYO1B	ventral_progenitors_and_neurons_1
DUSP6	-1.49132	3.48512	35.417	0.00112197	0.0376251	DUSP6	ventral_progenitors_and_neurons_1
TMEM45A	-1.4981	3.69725	35.3705	0.00112574	0.0376612	TMEM45A	ventral_progenitors_and_neurons_1
CITED4	-1.47585	3.58164	35.0385	0.00115313	0.0377285	CITED4	ventral_progenitors_and_neurons_1
RGS16	1.30647	4.99087	34.7193	0.00118032	0.0377285	RGS16	ventral_progenitors_and_neurons_1
RPL37A	1.02998	12.0325	34.617	0.00118922	0.0377285	RPL37A	ventral_progenitors_and_neurons_1
PLCL2	1.0065	4.82347	34.6493	0.0011864	0.0377285	PLCL2	ventral_progenitors_and_neurons_1
SHOX2	-3.61035	3.32359	34.7497	0.0011777	0.0377285	SHOX2	ventral_progenitors_and_neurons_1
HMX1	2.90979	2.79791	35.1713	0.00114207	0.0377285	HMX1	ventral_progenitors_and_neurons_1
PCDH7	-1.2554	5.23231	35.0784	0.00114979	0.0377285	PCDH7	ventral_progenitors_and_neurons_1
CDH12	-2.50476	3.26406	34.8737	0.00116707	0.0377285	CDH12	ventral_progenitors_and_neurons_1
C1QTNF3	1.46908	3.69332	34.5487	0.0011952	0.0377285	C1QTNF3	ventral_progenitors_and_neurons_1
MAST4	-1.1679	4.35053	35.1937	0.00114022	0.0377285	MAST4	ventral_progenitors_and_neurons_1
VSTM2A	-2.86106	4.10802	34.5785	0.00119259	0.0377285	VSTM2A	ventral_progenitors_and_neurons_1
HSPB1	1.09758	6.95442	35.1587	0.00114311	0.0377285	HSPB1	ventral_progenitors_and_neurons_1
CXorf57	-7.86353	1.69092	47.2244	0.00115258	0.0377285	CXorf57	ventral_progenitors_and_neurons_1
AL354733.3	2.25465	5.65005	34.6886	0.00118298	0.0377285	AL354733.3	ventral_progenitors_and_neurons_1
PRTG	-2.75055	2.85092	34.9183	0.00116327	0.0377285	PRTG	ventral_progenitors_and_neurons_1
ZNF133	1.09533	4.13768	34.9713	0.00115879	0.0377285	ZNF133	ventral_progenitors_and_neurons_1
GDAP1L1	-1.2273	6.73201	34.8422	0.00116975	0.0377285	GDAP1L1	ventral_progenitors_and_neurons_1
UBE2V1	1.86354	3.66517	34.6558	0.00118583	0.0377285	UBE2V1	ventral_progenitors_and_neurons_1
NKAIN4	-1.08251	5.19599	34.5545	0.00119469	0.0377285	NKAIN4	ventral_progenitors_and_neurons_1
IQCE	1.12681	4.69935	34.378	0.00121036	0.0377805	IQCE	ventral_progenitors_and_neurons_1
GNG3	-2.16689	6.79869	34.394	0.00120892	0.0377805	GNG3	ventral_progenitors_and_neurons_1
SPTBN4	1.32667	4.20889	34.4652	0.00120258	0.0377805	SPTBN4	ventral_progenitors_and_neurons_1
LINC02076	1.64602	3.29794	34.2664	0.0012204	0.0379247	LINC02076	ventral_progenitors_and_neurons_1
HOTAIRM1	-4.63634	5.02888	33.9645	0.00124813	0.0384447	HOTAIRM1	ventral_progenitors_and_neurons_1
CRNDE	-2.43745	6.21872	33.9067	0.00125354	0.0385265	CRNDE	ventral_progenitors_and_neurons_1
RPS17	1.27219	7.07989	33.5287	0.00128969	0.0392066	RPS17	ventral_progenitors_and_neurons_1
UBE2E3	-1.27694	7.91697	33.2832	0.00131392	0.0395987	UBE2E3	ventral_progenitors_and_neurons_1
AC006504.5	1.35176	3.6547	33.2999	0.00131225	0.0395987	AC006504.5	ventral_progenitors_and_neurons_1
RASSF8-AS1	-1.32794	4.23715	33.2224	0.00132002	0.0396118	RASSF8-AS1	ventral_progenitors_and_neurons_1
LHX4	1.60073	3.25806	33.1167	0.0013307	0.039847	LHX4	ventral_progenitors_and_neurons_1
C15orf41	-1.47248	5.06655	32.9163	0.00135128	0.0403767	C15orf41	ventral_progenitors_and_neurons_1
ZIC1	-3.45217	5.47752	32.8829	0.00135475	0.0403941	ZIC1	ventral_progenitors_and_neurons_1
PRMT8	-1.72641	3.49103	32.6965	0.00137436	0.0408047	PRMT8	ventral_progenitors_and_neurons_1
FAM84B	1.98361	2.46731	32.6581	0.00137844	0.0408133	FAM84B	ventral_progenitors_and_neurons_1
SPINT2	-1.07028	6.46053	32.6389	0.00138049	0.0408133	SPINT2	ventral_progenitors_and_neurons_1
TFAP2B	-5.61888	6.42825	32.5764	0.00138719	0.0409249	TFAP2B	ventral_progenitors_and_neurons_1
IRX3	-3.43147	4.46799	32.4283	0.00140323	0.0412167	IRX3	ventral_progenitors_and_neurons_1
RAB3A	-1.20434	7.21248	32.4484	0.00140104	0.0412167	RAB3A	ventral_progenitors_and_neurons_1
HS3ST5	-2.4907	2.98476	32.2902	0.00141842	0.0412604	HS3ST5	ventral_progenitors_and_neurons_1
CAPRIN2	1.03272	4.96627	32.3038	0.00141691	0.0412604	CAPRIN2	ventral_progenitors_and_neurons_1
NETO1	-2.20459	2.87968	32.283	0.00141921	0.0412604	NETO1	ventral_progenitors_and_neurons_1
OLFM2	-1.0236	6.33819	32.3335	0.00141363	0.0412604	OLFM2	ventral_progenitors_and_neurons_1
RGS7BP	1.4369	3.31013	32.2155	0.00142672	0.0413069	RGS7BP	ventral_progenitors_and_neurons_1
CTBP1-AS	1.64734	2.9792	32.1147	0.00143803	0.0413887	CTBP1-AS	ventral_progenitors_and_neurons_1
ZNF883	1.21644	5.74773	32.1449	0.00143463	0.0413887	ZNF883	ventral_progenitors_and_neurons_1
SLC22A5	1.78906	3.17598	31.9793	0.00145342	0.0417344	SLC22A5	ventral_progenitors_and_neurons_1
KISS1R	-1.43756	3.84118	31.9155	0.00146075	0.0417731	KISS1R	ventral_progenitors_and_neurons_1
CHST15	2.34037	2.33237	31.6388	0.0014931	0.042181	CHST15	ventral_progenitors_and_neurons_1
ZSCAN30	1.16348	5.43388	31.7011	0.00148574	0.042181	ZSCAN30	ventral_progenitors_and_neurons_1
IRX5	-3.57907	4.47276	31.5483	0.0015039	0.0422857	IRX5	ventral_progenitors_and_neurons_1
SCRT2	-1.48822	5.49931	31.5318	0.00150588	0.0422857	SCRT2	ventral_progenitors_and_neurons_1
BTG2	-1.48639	4.39607	31.4522	0.00151547	0.0423129	BTG2	ventral_progenitors_and_neurons_1
FAM107A	2.91457	3.00179	31.2341	0.0015422	0.0423129	FAM107A	ventral_progenitors_and_neurons_1
ALCAM	-1.75564	3.88857	31.4255	0.00151871	0.0423129	ALCAM	ventral_progenitors_and_neurons_1
MAN2A2	1.03017	4.88493	31.2886	0.00153546	0.0423129	MAN2A2	ventral_progenitors_and_neurons_1
S100A6	-1.3243	3.5796	31.1723	0.00154988	0.042414	S100A6	ventral_progenitors_and_neurons_1
RAB12	1.66246	2.96647	31.12	0.00155642	0.042427	RAB12	ventral_progenitors_and_neurons_1
C2orf80	-1.06128	4.15904	30.9545	0.00157738	0.0429145	C2orf80	ventral_progenitors_and_neurons_1
TK2	1.33087	4.67204	30.8768	0.00158735	0.0430745	TK2	ventral_progenitors_and_neurons_1
CAV1	3.50457	0.956465	30.8194	0.00159477	0.0431359	CAV1	ventral_progenitors_and_neurons_1
PTGR1	-1.39682	4.20161	30.7114	0.00160886	0.0433684	PTGR1	ventral_progenitors_and_neurons_1
C1QTNF4	-1.13316	5.6158	30.706	0.00160957	0.0433684	C1QTNF4	ventral_progenitors_and_neurons_1
AL139393.2	-1.58549	3.19399	30.5177	0.00163455	0.0434358	AL139393.2	ventral_progenitors_and_neurons_1
EN2	-5.64757	4.73315	30.607	0.00162264	0.0434358	EN2	ventral_progenitors_and_neurons_1
AP001462.1	1.40322	3.48146	30.6047	0.00162294	0.0434358	AP001462.1	ventral_progenitors_and_neurons_1
RNF112	2.16659	4.33446	30.503	0.00163652	0.0434358	RNF112	ventral_progenitors_and_neurons_1
TTC4	1.77702	3.14674	30.3876	0.00165211	0.0435907	TTC4	ventral_progenitors_and_neurons_1
CAMKV	2.21496	6.00816	30.3997	0.00165047	0.0435907	CAMKV	ventral_progenitors_and_neurons_1
MINPP1	-1.05762	4.09696	30.2344	0.00167312	0.0437324	MINPP1	ventral_progenitors_and_neurons_1
PPP6R2	1.25169	6.39293	30.1366	0.00168672	0.0438924	PPP6R2	ventral_progenitors_and_neurons_1
MYC	-1.4495	3.37785	30.0723	0.00169574	0.0439135	MYC	ventral_progenitors_and_neurons_1
COL5A1	2.35627	1.77242	30.0883	0.00169349	0.0439135	COL5A1	ventral_progenitors_and_neurons_1
OSBPL3	2.88412	1.93884	30.0356	0.00170092	0.043966	OSBPL3	ventral_progenitors_and_neurons_1
FAM89A	-1.70237	3.123	29.9401	0.00171449	0.0440725	FAM89A	ventral_progenitors_and_neurons_1
AC005253.1	1.34398	3.34495	29.9516	0.00171286	0.0440725	AC005253.1	ventral_progenitors_and_neurons_1
AL162426.1	2.69468	3.01476	29.7861	0.0017367	0.0443985	AL162426.1	ventral_progenitors_and_neurons_1
CRABP1	-2.10318	8.80943	29.8002	0.00173466	0.0443985	CRABP1	ventral_progenitors_and_neurons_1
HEPH	-1.89637	2.80317	29.6342	0.00175898	0.0447379	HEPH	ventral_progenitors_and_neurons_1
ASIC4	-2.13386	2.91626	29.511	0.00177733	0.0449218	ASIC4	ventral_progenitors_and_neurons_1
HGF	3.89919	1.08657	29.4914	0.00178028	0.0449218	HGF	ventral_progenitors_and_neurons_1
HIBADH	-1.52066	3.28931	29.2159	0.00182234	0.0453446	HIBADH	ventral_progenitors_and_neurons_1
EGFL6	-4.54616	1.59156	29.2525	0.00181668	0.0453446	EGFL6	ventral_progenitors_and_neurons_1
MICAL2	3.74369	2.24619	29.2354	0.00181933	0.0453446	MICAL2	ventral_progenitors_and_neurons_1
PLK3	-1.23886	4.17369	28.9344	0.00186674	0.0453865	PLK3	ventral_progenitors_and_neurons_1
SERTAD4-AS1	-2.9061	2.12014	28.7252	0.00190066	0.0453865	SERTAD4-AS1	ventral_progenitors_and_neurons_1
LRRTM4	1.03283	5.02201	29.0761	0.00184422	0.0453865	LRRTM4	ventral_progenitors_and_neurons_1
STRADB	-1.06236	4.48208	29.1248	0.00183656	0.0453865	STRADB	ventral_progenitors_and_neurons_1
TAGLN3	-2.38895	8.06819	28.9208	0.00186892	0.0453865	TAGLN3	ventral_progenitors_and_neurons_1
BOC	1.39859	5.30755	29.1679	0.00182981	0.0453865	BOC	ventral_progenitors_and_neurons_1
SRD5A1	-1.12226	4.95752	28.8294	0.00188367	0.0453865	SRD5A1	ventral_progenitors_and_neurons_1
SAMD5	-4.0788	3.8437	28.8229	0.00188472	0.0453865	SAMD5	ventral_progenitors_and_neurons_1
DIAPH2	1.62699	3.35793	28.722	0.0019012	0.0453865	DIAPH2	ventral_progenitors_and_neurons_1
ST3GAL1	1.87004	5.24099	29.0518	0.00184806	0.0453865	ST3GAL1	ventral_progenitors_and_neurons_1
GRM5-AS1	3.3461	2.50065	29.0354	0.00185064	0.0453865	GRM5-AS1	ventral_progenitors_and_neurons_1
NPTN	-1.03683	5.37273	28.7175	0.00190192	0.0453865	NPTN	ventral_progenitors_and_neurons_1
ZNF460	1.38845	3.37387	28.761	0.0018948	0.0453865	ZNF460	ventral_progenitors_and_neurons_1
KLHL1	-2.37809	2.67335	28.6908	0.00190632	0.045414	KLHL1	ventral_progenitors_and_neurons_1
AC022639.1	-2.38408	2.12481	28.5976	0.00192177	0.0455753	AC022639.1	ventral_progenitors_and_neurons_1
PHYHIPL	-1.33438	5.98477	28.5132	0.00193591	0.0455753	PHYHIPL	ventral_progenitors_and_neurons_1
SLC1A5	1.01679	4.05422	28.5357	0.00193213	0.0455753	SLC1A5	ventral_progenitors_and_neurons_1
AL355075.4	1.17548	4.4282	28.4326	0.00194953	0.0456655	AL355075.4	ventral_progenitors_and_neurons_1
BST2	3.98674	1.70151	28.4351	0.0019491	0.0456655	BST2	ventral_progenitors_and_neurons_1
MYT1L	1.14016	7.62658	28.3412	0.00196515	0.0457926	MYT1L	ventral_progenitors_and_neurons_1
ZNF804A	-1.25988	3.65927	28.3242	0.00196806	0.0457926	ZNF804A	ventral_progenitors_and_neurons_1
FMC1	-1.13439	5.22952	28.3536	0.00196302	0.0457926	FMC1	ventral_progenitors_and_neurons_1
DOC2A	1.01755	4.1532	28.3332	0.00196652	0.0457926	DOC2A	ventral_progenitors_and_neurons_1
EPB41	-1.47055	6.15349	28.2962	0.00197289	0.0458287	EPB41	ventral_progenitors_and_neurons_1
MSTN	4.29028	0.540452	28.2589	0.00197934	0.0459024	MSTN	ventral_progenitors_and_neurons_1
PHLDA3	-1.2163	3.7556	28.1494	0.00199844	0.0459775	PHLDA3	ventral_progenitors_and_neurons_1
TMED7	-1.0395	5.14475	28.1778	0.00199347	0.0459775	TMED7	ventral_progenitors_and_neurons_1
UACA	1.3634	3.53915	28.1171	0.00200413	0.0459775	UACA	ventral_progenitors_and_neurons_1
ALYREF	-1.02236	5.036	28.0999	0.00200716	0.0459775	ALYREF	ventral_progenitors_and_neurons_1
GBE1	-1.32905	3.55499	27.9763	0.00202917	0.0461396	GBE1	ventral_progenitors_and_neurons_1
RAPGEF3	2.49582	1.70664	27.9899	0.00202673	0.0461396	RAPGEF3	ventral_progenitors_and_neurons_1
AC099791.2	1.45352	3.03907	27.618	0.00209479	0.0462042	AC099791.2	ventral_progenitors_and_neurons_1
LGI2	-3.16736	3.06179	27.7175	0.00207628	0.0462042	LGI2	ventral_progenitors_and_neurons_1
CDKL2	1.21491	4.35654	27.7338	0.00207326	0.0462042	CDKL2	ventral_progenitors_and_neurons_1
PLP2	1.35056	4.05902	27.6309	0.00209238	0.0462042	PLP2	ventral_progenitors_and_neurons_1
AL161772.1	1.14798	3.63549	27.6319	0.0020922	0.0462042	AL161772.1	ventral_progenitors_and_neurons_1
REM2	-2.29427	3.95222	27.9163	0.00203995	0.0462042	REM2	ventral_progenitors_and_neurons_1
SMOC1	1.52865	2.94969	27.7463	0.00207097	0.0462042	SMOC1	ventral_progenitors_and_neurons_1
GJD2	-5.25831	2.20945	27.732	0.0020736	0.0462042	GJD2	ventral_progenitors_and_neurons_1
AC020910.4	-1.95432	2.85618	27.7075	0.00207814	0.0462042	AC020910.4	ventral_progenitors_and_neurons_1
DHX34	1.0176	3.92931	27.7645	0.00206761	0.0462042	DHX34	ventral_progenitors_and_neurons_1
GABRG2	1.32036	6.39025	27.5229	0.00211268	0.0463794	GABRG2	ventral_progenitors_and_neurons_1
GXYLT1	1.24529	3.61218	27.5051	0.00211606	0.0463808	GXYLT1	ventral_progenitors_and_neurons_1
ERICH3	3.21826	1.83086	27.4471	0.00212709	0.046403	ERICH3	ventral_progenitors_and_neurons_1
C22orf42	-5.23113	2.17035	27.4792	0.00212097	0.046403	C22orf42	ventral_progenitors_and_neurons_1
RPL36	1.06737	11.341	27.3364	0.00214838	0.0465816	RPL36	ventral_progenitors_and_neurons_1
AC007193.1	2.12496	3.63059	27.3535	0.00214508	0.0465816	AC007193.1	ventral_progenitors_and_neurons_1
PCP4L1	-2.36385	4.23932	27.1158	0.00219166	0.0468697	PCP4L1	ventral_progenitors_and_neurons_1
ZNF610	1.09816	3.91048	27.1315	0.00218854	0.0468697	ZNF610	ventral_progenitors_and_neurons_1
WDR19	1.06339	4.09468	27.0636	0.00220207	0.0470134	WDR19	ventral_progenitors_and_neurons_1
DNER	-1.90757	7.52489	27.0034	0.00221417	0.0470411	DNER	ventral_progenitors_and_neurons_1
IER5L	-1.60201	6.22312	26.9375	0.0022275	0.0470411	IER5L	ventral_progenitors_and_neurons_1
MIPOL1	1.62779	4.21718	26.9238	0.00223028	0.0470411	MIPOL1	ventral_progenitors_and_neurons_1
STARD9	-1.05774	3.98769	27.0397	0.00220686	0.0470411	STARD9	ventral_progenitors_and_neurons_1
GPSM2	1.17667	6.09385	26.8886	0.00223747	0.0470508	GPSM2	ventral_progenitors_and_neurons_1
TMEM255A	-3.58794	2.06895	26.8394	0.00224757	0.0470508	TMEM255A	ventral_progenitors_and_neurons_1
EPS8L2	-1.54663	3.23129	26.8675	0.00224179	0.0470508	EPS8L2	ventral_progenitors_and_neurons_1
KCNT2	1.93707	4.18261	26.7647	0.00226299	0.0473029	KCNT2	ventral_progenitors_and_neurons_1
PROCA1	-1.28363	4.02748	26.7404	0.00226805	0.047338	PROCA1	ventral_progenitors_and_neurons_1
ZNF436-AS1	-1.11465	5.03942	26.7235	0.00227157	0.0473407	ZNF436-AS1	ventral_progenitors_and_neurons_1
FGF18	1.75707	2.63419	26.6439	0.00228825	0.0475179	FGF18	ventral_progenitors_and_neurons_1
DNAJC12	-1.08027	5.35149	26.6379	0.00228953	0.0475179	DNAJC12	ventral_progenitors_and_neurons_1
AL358473.1	-3.38021	1.88403	26.5753	0.00230277	0.0476213	AL358473.1	ventral_progenitors_and_neurons_1
RASSF8	-1.48047	3.12327	26.5626	0.00230546	0.0476213	RASSF8	ventral_progenitors_and_neurons_1
AC090204.1	-1.5526	4.18064	26.4728	0.00232469	0.0477793	AC090204.1	ventral_progenitors_and_neurons_1
HIST1H2BD	1.1205	3.73312	26.2148	0.00238114	0.0481183	HIST1H2BD	ventral_progenitors_and_neurons_1
VLDLR-AS1	1.1548	4.08282	26.1612	0.00239307	0.0482201	VLDLR-AS1	ventral_progenitors_and_neurons_1
SLC35G1	1.41857	3.63561	26.1263	0.00240091	0.048239	SLC35G1	ventral_progenitors_and_neurons_1
PLAGL1	1.07775	4.40486	26.0442	0.00241945	0.0485163	PLAGL1	ventral_progenitors_and_neurons_1
APLP1	-1.35669	7.88459	26.0346	0.00242165	0.0485163	APLP1	ventral_progenitors_and_neurons_1
LINC01635	5.22359	0.206043	26.0016	0.00242916	0.0485972	LINC01635	ventral_progenitors_and_neurons_1
MGAT4C	-1.48682	4.62838	25.9451	0.0024421	0.0486353	MGAT4C	ventral_progenitors_and_neurons_1
SYNDIG1	1.52558	3.11053	25.9256	0.00244659	0.0486353	SYNDIG1	ventral_progenitors_and_neurons_1
KIAA0319	2.4907	1.46527	25.7859	0.00247909	0.0486904	KIAA0319	ventral_progenitors_and_neurons_1
SHANK2-AS1	1.49822	3.6331	25.7988	0.00247607	0.0486904	SHANK2-AS1	ventral_progenitors_and_neurons_1
ABCD2	3.04438	2.53075	25.6618	0.00250844	0.0490695	ABCD2	ventral_progenitors_and_neurons_1
LRRC3B	1.91446	5.22633	25.6323	0.0025155	0.0491296	LRRC3B	ventral_progenitors_and_neurons_1
NECAB2	-1.92016	4.49328	25.488	0.00255035	0.0495335	NECAB2	ventral_progenitors_and_neurons_1
ETFB	-1.62874	8.03996	25.4954	0.00254854	0.0495335	ETFB	ventral_progenitors_and_neurons_1
HOXA2	-5.01334	2.78889	25.4134	0.00256863	0.0496	HOXA2	ventral_progenitors_and_neurons_1
AC009133.1	1.10127	3.95249	25.4017	0.00257151	0.0496	AC009133.1	ventral_progenitors_and_neurons_1
BBC3	-1.6753	4.82969	25.4244	0.00256591	0.0496	BBC3	ventral_progenitors_and_neurons_1
PRMT9	1.14575	4.87091	25.3481	0.00258477	0.0497186	PRMT9	ventral_progenitors_and_neurons_1

## Sheet: VP&N2
	logFC	logCPM	F	p_val	p_adj	gene	cluster_id
AC010319.3	-3.54211	7.71809	573.017	2.3113e-125	3.20924e-121	AC010319.3	ventral_progenitors_and_neurons_2
PLAUR	-6.91616	4.14146	246.044	3.26723e-55	2.26827e-51	PLAUR	ventral_progenitors_and_neurons_2
TDP1	-3.1286	6.34626	207.464	7.24923e-47	3.35518e-43	TDP1	ventral_progenitors_and_neurons_2
AC108134.2	-3.25784	5.79243	162.342	4.42426e-37	1.53577e-33	AC108134.2	ventral_progenitors_and_neurons_2
NFIB	3.34439	9.54737	160.302	1.22713e-36	3.40773e-33	NFIB	ventral_progenitors_and_neurons_2
LAMP5	-6.67482	3.23621	109.777	1.2241e-25	2.83278e-22	LAMP5	ventral_progenitors_and_neurons_2
NEAT1	-1.74852	7.79865	103.602	2.728e-24	5.41118e-21	NEAT1	ventral_progenitors_and_neurons_2
NFIA	3.20698	8.56491	94.2863	2.96228e-22	5.14141e-19	NFIA	ventral_progenitors_and_neurons_2
RPL31	1.48965	10.7644	73.5536	1.02957e-17	1.42956e-14	RPL31	ventral_progenitors_and_neurons_2
NSMF	2.91835	8.29775	73.7017	9.55318e-18	1.42956e-14	NSMF	ventral_progenitors_and_neurons_2
HMGB2	-1.56222	7.62306	71.4148	3.0346e-17	3.83049e-14	HMGB2	ventral_progenitors_and_neurons_2
RPL36	1.45699	11.7409	70.0299	6.11224e-17	7.07237e-14	RPL36	ventral_progenitors_and_neurons_2
IGFBP5	3.44608	7.96626	69.635	7.463e-17	7.97106e-14	IGFBP5	ventral_progenitors_and_neurons_2
MEIS1	-3.08427	4.79092	68.4868	1.33396e-16	1.323e-13	MEIS1	ventral_progenitors_and_neurons_2
MEIS2	-1.68222	7.19704	67.198	2.56036e-16	2.37004e-13	MEIS2	ventral_progenitors_and_neurons_2
ZFHX4	-2.46399	5.5894	66.0045	4.68415e-16	4.06496e-13	ZFHX4	ventral_progenitors_and_neurons_2
GRIN2B	2.8188	8.07635	62.2334	3.16231e-15	2.46472e-12	GRIN2B	ventral_progenitors_and_neurons_2
NFIX	5.39362	7.37743	62.213	3.19517e-15	2.46472e-12	NFIX	ventral_progenitors_and_neurons_2
PUS7L	-9.20356	2.31151	60.4946	7.63306e-15	5.57816e-12	PUS7L	ventral_progenitors_and_neurons_2
WSB1	-1.0099	9.90631	55.9535	7.63989e-14	5.30399e-11	WSB1	ventral_progenitors_and_neurons_2
EEF1B2	1.2997	10.1672	55.4978	9.62878e-14	6.36646e-11	EEF1B2	ventral_progenitors_and_neurons_2
MEF2C	3.00263	7.75946	54.203	1.8583e-13	1.03813e-10	MEF2C	ventral_progenitors_and_neurons_2
CD24	-1.42144	7.54854	54.1915	1.86916e-13	1.03813e-10	CD24	ventral_progenitors_and_neurons_2
PBX3	-2.45154	5.33812	54.3534	1.72159e-13	1.03813e-10	PBX3	ventral_progenitors_and_neurons_2
RPS29	1.28113	11.9536	54.2469	1.81734e-13	1.03813e-10	RPS29	ventral_progenitors_and_neurons_2
BTF3	-1.11884	8.66014	54.0935	1.96454e-13	1.04914e-10	BTF3	ventral_progenitors_and_neurons_2
NEFL	-1.63187	6.77514	48.5538	3.28516e-12	1.62909e-09	NEFL	ventral_progenitors_and_neurons_2
TCF4	2.05777	8.24688	48.562	3.27148e-12	1.62909e-09	TCF4	ventral_progenitors_and_neurons_2
FOXG1	2.46064	7.87103	47.559	5.45154e-12	2.61016e-09	FOXG1	ventral_progenitors_and_neurons_2
RPL37A	1.25513	12.516	47.4063	5.89234e-12	2.72717e-09	RPL37A	ventral_progenitors_and_neurons_2
CRABP1	-1.27853	7.7532	46.9915	7.27863e-12	3.26012e-09	CRABP1	ventral_progenitors_and_neurons_2
RPL38	1.12691	11.4505	45.3275	1.69939e-11	7.37378e-09	RPL38	ventral_progenitors_and_neurons_2
AC083880.1	-4.18124	3.2498	43.351	4.65659e-11	1.9593e-08	AC083880.1	ventral_progenitors_and_neurons_2
PTPRZ1	2.6298	7.59114	42.7267	6.4038e-11	2.6152e-08	PTPRZ1	ventral_progenitors_and_neurons_2
MEST	-2.01183	5.74181	42.4142	7.5112e-11	2.9798e-08	MEST	ventral_progenitors_and_neurons_2
RPS18	1.15563	12.3357	42.0661	8.9724e-11	3.4606e-08	RPS18	ventral_progenitors_and_neurons_2
RPS8	1.08946	11.875	40.5625	1.93403e-10	7.25785e-08	RPS8	ventral_progenitors_and_neurons_2
PLCG2	1.03411	10.963	39.5839	3.18942e-10	1.1654e-07	PLCG2	ventral_progenitors_and_neurons_2
HSPH1	1.2034	9.34036	39.2617	3.76084e-10	1.33895e-07	HSPH1	ventral_progenitors_and_neurons_2
RPS21	1.02275	11.0492	38.7241	4.9512e-10	1.71868e-07	RPS21	ventral_progenitors_and_neurons_2
C1orf61	1.14823	9.4246	37.6634	8.52025e-10	2.88546e-07	C1orf61	ventral_progenitors_and_neurons_2
AC005261.1	2.05715	7.82592	37.524	9.15064e-10	3.02516e-07	AC005261.1	ventral_progenitors_and_neurons_2
RPL39	1.0595	12.1938	36.7393	1.36768e-09	4.41633e-07	RPL39	ventral_progenitors_and_neurons_2
RPL37	1.03975	12.0002	36.5959	1.47198e-09	4.6451e-07	RPL37	ventral_progenitors_and_neurons_2
FEZF2	4.63819	6.65323	35.7971	2.21651e-09	6.54814e-07	FEZF2	ventral_progenitors_and_neurons_2
RPS2	1.02868	12.1442	35.0453	3.25905e-09	9.42748e-07	RPS2	ventral_progenitors_and_neurons_2
TCEAL7	-1.66698	6.15051	34.1522	5.15338e-09	1.43109e-06	TCEAL7	ventral_progenitors_and_neurons_2
NEUROD6	1.26229	8.81951	33.9419	5.74094e-09	1.563e-06	NEUROD6	ventral_progenitors_and_neurons_2
PSD3	3.0333	7.01776	33.683	6.55705e-09	1.75086e-06	PSD3	ventral_progenitors_and_neurons_2
GABRG2	2.81144	7.11459	33.4405	7.4265e-09	1.9456e-06	GABRG2	ventral_progenitors_and_neurons_2
LMO3	2.25141	7.39699	31.7684	1.75377e-08	4.27213e-06	LMO3	ventral_progenitors_and_neurons_2
DPYSL2	1.05017	9.34406	31.578	1.9342e-08	4.63041e-06	DPYSL2	ventral_progenitors_and_neurons_2
POU2F2	-1.91407	5.47341	30.7582	2.94924e-08	6.39847e-06	POU2F2	ventral_progenitors_and_neurons_2
GNG3	-1.87342	5.54754	30.6668	3.09127e-08	6.60342e-06	GNG3	ventral_progenitors_and_neurons_2
HIST1H2BF	9.46437	6.16224	30.5461	3.28951e-08	6.92043e-06	HIST1H2BF	ventral_progenitors_and_neurons_2
SCG2	-2.17697	4.98633	30.3448	3.64879e-08	7.56171e-06	SCG2	ventral_progenitors_and_neurons_2
CAMKV	2.70975	7.01834	30.2391	3.85297e-08	7.86742e-06	CAMKV	ventral_progenitors_and_neurons_2
BBC3	-2.09267	5.10129	29.7208	5.03205e-08	1.01261e-05	BBC3	ventral_progenitors_and_neurons_2
THRA	1.59191	7.95479	28.9921	7.32637e-08	1.45324e-05	THRA	ventral_progenitors_and_neurons_2
ATP5ME	1.0877	8.9689	28.8662	7.8179e-08	1.52889e-05	ATP5ME	ventral_progenitors_and_neurons_2
SLC5A3	1.54425	7.9758	28.1266	1.14501e-07	2.14844e-05	SLC5A3	ventral_progenitors_and_neurons_2
GADD45A	-2.31278	4.66209	27.9435	1.25855e-07	2.31576e-05	GADD45A	ventral_progenitors_and_neurons_2
PLD3	-1.29022	6.82788	27.9297	1.26754e-07	2.31576e-05	PLD3	ventral_progenitors_and_neurons_2
SLC44A2	-2.45604	4.434	27.5056	1.57789e-07	2.77329e-05	SLC44A2	ventral_progenitors_and_neurons_2
RBM12B	2.04612	7.35066	27.4792	1.59953e-07	2.77619e-05	RBM12B	ventral_progenitors_and_neurons_2
ZBTB18	2.80172	6.79627	26.9967	2.05243e-07	3.47536e-05	ZBTB18	ventral_progenitors_and_neurons_2
PHC3	1.69958	7.678	26.6767	2.42162e-07	4.00288e-05	PHC3	ventral_progenitors_and_neurons_2
EBF1	-3.03506	3.69345	26.608	2.50925e-07	4.09058e-05	EBF1	ventral_progenitors_and_neurons_2
SHTN1	2.29677	7.09207	26.5893	2.5336e-07	4.09058e-05	SHTN1	ventral_progenitors_and_neurons_2
LPL	4.25332	6.28455	26.3301	2.8971e-07	4.57116e-05	LPL	ventral_progenitors_and_neurons_2
NELL2	2.27467	7.07125	25.933	3.55777e-07	5.55052e-05	NELL2	ventral_progenitors_and_neurons_2
ATF5	2.14353	7.1316	25.1982	5.20488e-07	7.77094e-05	ATF5	ventral_progenitors_and_neurons_2
HIST2H2BE	1.44499	7.94505	25.0978	5.48287e-07	8.0989e-05	HIST2H2BE	ventral_progenitors_and_neurons_2
CNNM1	-2.28589	4.55889	24.9079	6.04975e-07	8.84219e-05	CNNM1	ventral_progenitors_and_neurons_2
TAGLN3	-1.34202	6.48328	24.7557	6.54636e-07	9.18209e-05	TAGLN3	ventral_progenitors_and_neurons_2
HLA-B	-1.41058	6.29741	24.7556	6.54683e-07	9.18209e-05	HLA-B	ventral_progenitors_and_neurons_2
CADM1	1.37043	8.04618	24.6954	6.75417e-07	9.37817e-05	CADM1	ventral_progenitors_and_neurons_2
ZBTB41	2.708	6.70799	24.585	7.15213e-07	9.83241e-05	ZBTB41	ventral_progenitors_and_neurons_2
TMEM161B-AS1	1.56915	7.71861	24.538	7.3286e-07	9.97624e-05	TMEM161B-AS1	ventral_progenitors_and_neurons_2
HIST1H2BD	1.95202	7.26048	24.4627	7.62033e-07	0.000101739	HIST1H2BD	ventral_progenitors_and_neurons_2
MAB21L1	-2.3455	4.44749	24.477	7.56411e-07	0.000101739	MAB21L1	ventral_progenitors_and_neurons_2
KCNG1	9.14259	5.85288	24.4374	7.72096e-07	0.0001021	KCNG1	ventral_progenitors_and_neurons_2
MAPT	1.13263	8.52732	24.3384	8.12775e-07	0.000105471	MAPT	ventral_progenitors_and_neurons_2
ZFHX3	-1.60689	5.76281	23.9281	1.0056e-06	0.000126934	ZFHX3	ventral_progenitors_and_neurons_2
NPTXR	3.35604	6.37108	23.6718	1.14872e-06	0.000142732	NPTXR	ventral_progenitors_and_neurons_2
CCND2	1.06048	8.64442	23.3522	1.3561e-06	0.000163735	CCND2	ventral_progenitors_and_neurons_2
DLX6-AS1	-6.47086	1.77616	23.0798	1.56228e-06	0.000185404	DLX6-AS1	ventral_progenitors_and_neurons_2
TFAP2B	-3.45703	3.10366	22.7411	1.86303e-06	0.000217379	TFAP2B	ventral_progenitors_and_neurons_2
ARFGEF3	1.81073	7.26075	22.2031	2.46466e-06	0.000279558	ARFGEF3	ventral_progenitors_and_neurons_2
RPS27L	-1.13565	6.95857	22.1939	2.47646e-06	0.000279558	RPS27L	ventral_progenitors_and_neurons_2
KPNB1	1.19509	8.2165	22.1775	2.49767e-06	0.000279678	KPNB1	ventral_progenitors_and_neurons_2
CNTNAP2	1.28242	8.01659	21.9799	2.76829e-06	0.000305061	CNTNAP2	ventral_progenitors_and_neurons_2
ETFB	-1.24958	6.56099	21.8743	2.92481e-06	0.000317273	ETFB	ventral_progenitors_and_neurons_2
SLC17A7	2.59151	6.5963	21.8107	3.0233e-06	0.000325415	SLC17A7	ventral_progenitors_and_neurons_2
CSRP2	1.18288	8.20424	21.6874	3.2238e-06	0.000344326	CSRP2	ventral_progenitors_and_neurons_2
MAP6	-1.31925	6.34129	21.5937	3.385e-06	0.000358784	MAP6	ventral_progenitors_and_neurons_2
C4orf3	-1.16506	6.80433	21.4886	3.5755e-06	0.000376104	C4orf3	ventral_progenitors_and_neurons_2
HIST1H2AC	1.41809	7.72573	21.3071	3.93024e-06	0.000407249	HIST1H2AC	ventral_progenitors_and_neurons_2
ACOT7	-1.64901	5.5021	21.2654	4.01659e-06	0.000413114	ACOT7	ventral_progenitors_and_neurons_2
ATXN2L	-1.16863	6.77328	21.2474	4.05457e-06	0.000413954	ATXN2L	ventral_progenitors_and_neurons_2
FOS	-1.91998	4.96196	21.2265	4.09885e-06	0.00041542	FOS	ventral_progenitors_and_neurons_2
TSPO	1.99632	6.99185	21.0869	4.4085e-06	0.000440374	TSPO	ventral_progenitors_and_neurons_2
SYT1	1.16658	8.14674	20.5197	5.92658e-06	0.00058779	SYT1	ventral_progenitors_and_neurons_2
GABRB3	2.33719	6.66365	20.4127	6.2671e-06	0.000612808	GABRB3	ventral_progenitors_and_neurons_2
AGO3	1.74387	7.19643	20.2747	6.73551e-06	0.000649462	AGO3	ventral_progenitors_and_neurons_2
PURB	1.17423	8.11199	20.2773	6.72643e-06	0.000649462	PURB	ventral_progenitors_and_neurons_2
FASN	1.20196	8.04401	20.2053	6.98414e-06	0.000668791	FASN	ventral_progenitors_and_neurons_2
TBR1	1.95974	6.95773	20.1431	7.21488e-06	0.000681487	TBR1	ventral_progenitors_and_neurons_2
SLC44A1	3.93508	5.97926	20.156	7.16643e-06	0.000681487	SLC44A1	ventral_progenitors_and_neurons_2
CDR1	8.82074	5.54567	19.4586	1.03191e-05	0.000948878	CDR1	ventral_progenitors_and_neurons_2
C6orf48	1.0094	8.44805	19.3455	1.09483e-05	0.00100011	C6orf48	ventral_progenitors_and_neurons_2
PKD1	1.17691	8.02023	19.2912	1.12636e-05	0.00102219	PKD1	ventral_progenitors_and_neurons_2
ZEB2	1.84204	7.01087	19.2666	1.14094e-05	0.0010287	ZEB2	ventral_progenitors_and_neurons_2
GPR22	3.88024	5.92695	19.2283	1.1641e-05	0.00104281	GPR22	ventral_progenitors_and_neurons_2
C1QTNF4	-1.96748	4.72935	18.9991	1.3125e-05	0.00115343	C1QTNF4	ventral_progenitors_and_neurons_2
MACROD2	8.77265	5.49963	18.7973	1.45881e-05	0.00126598	MACROD2	ventral_progenitors_and_neurons_2
INSIG1	1.17841	7.97348	18.7843	1.46883e-05	0.00126675	INSIG1	ventral_progenitors_and_neurons_2
GUCY1A2	8.76623	5.4938	18.7107	1.5266e-05	0.00130845	GUCY1A2	ventral_progenitors_and_neurons_2
SVBP	-1.29766	6.18153	18.5745	1.63957e-05	0.0013679	SVBP	ventral_progenitors_and_neurons_2
DYRK2	1.68125	7.13865	18.5679	1.64522e-05	0.0013679	DYRK2	ventral_progenitors_and_neurons_2
NTS	2.10365	6.69467	18.4484	1.75158e-05	0.0014391	NTS	ventral_progenitors_and_neurons_2
GFOD1	2.69654	6.29928	18.4339	1.76498e-05	0.00144157	GFOD1	ventral_progenitors_and_neurons_2
MAB21L2	-3.75611	2.63641	18.3098	1.88366e-05	0.00152185	MAB21L2	ventral_progenitors_and_neurons_2
SLC6A5	-4.87306	2.0242	18.3083	1.88519e-05	0.00152185	SLC6A5	ventral_progenitors_and_neurons_2
CRNDE	-1.8545	4.8849	18.2835	1.90982e-05	0.00153282	CRNDE	ventral_progenitors_and_neurons_2
DOK6	3.81045	5.85959	18.0985	2.10454e-05	0.00166031	DOK6	ventral_progenitors_and_neurons_2
TFAP2A	-2.36389	4.05042	18.0041	2.21147e-05	0.00171543	TFAP2A	ventral_progenitors_and_neurons_2
PTAR1	1.7843	6.9569	17.8366	2.41481e-05	0.00184848	PTAR1	ventral_progenitors_and_neurons_2
ZNF423	-2.83368	3.45317	17.8384	2.41242e-05	0.00184848	ZNF423	ventral_progenitors_and_neurons_2
GRIN2D	-2.8328	3.45363	17.8302	2.42293e-05	0.00184848	GRIN2D	ventral_progenitors_and_neurons_2
GABPB1-AS1	1.0331	8.22921	17.7249	2.56062e-05	0.00194285	GABPB1-AS1	ventral_progenitors_and_neurons_2
EIF5B	1.30728	7.62279	17.7075	2.58412e-05	0.00195002	EIF5B	ventral_progenitors_and_neurons_2
ACVR2B	-1.46297	5.65552	17.4769	2.9171e-05	0.00216598	ACVR2B	ventral_progenitors_and_neurons_2
NUDT1	2.63832	6.24247	17.333	3.14634e-05	0.00232378	NUDT1	ventral_progenitors_and_neurons_2
NECAB1	8.6571	5.38958	17.2917	3.21552e-05	0.0023623	NECAB1	ventral_progenitors_and_neurons_2
RANBP6	3.02193	6.05144	17.226	3.32845e-05	0.00241966	RANBP6	ventral_progenitors_and_neurons_2
CBX6	1.92622	6.73932	17.0729	3.60779e-05	0.00260907	CBX6	ventral_progenitors_and_neurons_2
MTPN	1.14285	7.88792	17.0173	3.71488e-05	0.00265882	MTPN	ventral_progenitors_and_neurons_2
CSRNP3	1.33418	7.49949	16.8964	3.95903e-05	0.00281903	CSRNP3	ventral_progenitors_and_neurons_2
CCNG1	-1.70077	5.07141	16.7742	4.22211e-05	0.00299102	CCNG1	ventral_progenitors_and_neurons_2
ARHGEF9	1.20662	7.72406	16.7129	4.36072e-05	0.00305801	ARHGEF9	ventral_progenitors_and_neurons_2
PA2G4	1.27372	7.59099	16.6964	4.39862e-05	0.00306909	PA2G4	ventral_progenitors_and_neurons_2
LPCAT4	-1.73846	4.97819	16.5364	4.78576e-05	0.00328962	LPCAT4	ventral_progenitors_and_neurons_2
BEX5	1.80662	6.81285	16.5018	4.87362e-05	0.00333351	BEX5	ventral_progenitors_and_neurons_2
TIMP2	2.01226	6.60724	16.492	4.89909e-05	0.0033345	TIMP2	ventral_progenitors_and_neurons_2
CDKN1A	-2.85196	3.33416	16.3516	5.27543e-05	0.00355579	CDKN1A	ventral_progenitors_and_neurons_2
NEUROD2	1.79736	6.80425	16.2959	5.43273e-05	0.00364413	NEUROD2	ventral_progenitors_and_neurons_2
PRKACB	1.30604	7.47381	16.0957	6.03778e-05	0.00396479	PRKACB	ventral_progenitors_and_neurons_2
RIMS2	-3.0577	3.10055	16.1031	6.01424e-05	0.00396479	RIMS2	ventral_progenitors_and_neurons_2
ZNF148	1.22853	7.61793	16.067	6.12988e-05	0.00397726	ZNF148	ventral_progenitors_and_neurons_2
TH	-5.01641	1.86194	16.0187	6.28839e-05	0.0040461	TH	ventral_progenitors_and_neurons_2
ZNF506	-5.01601	1.8621	16.0169	6.29426e-05	0.0040461	ZNF506	ventral_progenitors_and_neurons_2
SYNE2	1.78341	6.79129	15.9912	6.3802e-05	0.00407649	SYNE2	ventral_progenitors_and_neurons_2
PCDH7	-2.16635	4.19135	15.9575	6.49464e-05	0.00408758	PCDH7	ventral_progenitors_and_neurons_2
COL25A1	8.54764	5.28546	15.9677	6.45999e-05	0.00408758	COL25A1	ventral_progenitors_and_neurons_2
MSRA	2.94425	5.9775	15.9542	6.50598e-05	0.00408758	MSRA	ventral_progenitors_and_neurons_2
CRYM	8.53899	5.277	15.8672	6.81205e-05	0.0042606	CRYM	ventral_progenitors_and_neurons_2
ZBTB43	1.32517	7.41234	15.8082	7.02768e-05	0.00433686	ZBTB43	ventral_progenitors_and_neurons_2
AKAP11	1.77446	6.78344	15.7955	7.07486e-05	0.00434666	AKAP11	ventral_progenitors_and_neurons_2
QSOX2	3.64649	5.70341	15.6523	7.63106e-05	0.00464725	QSOX2	ventral_progenitors_and_neurons_2
SLC2A1	-1.73108	4.91506	15.6022	7.83558e-05	0.00474886	SLC2A1	ventral_progenitors_and_neurons_2
SRRM3	-1.46059	5.50253	15.5948	7.86632e-05	0.00474886	SRRM3	ventral_progenitors_and_neurons_2
ISLR2	2.5389	6.14861	15.5622	8.00289e-05	0.0048104	ISLR2	ventral_progenitors_and_neurons_2
PCBP4	-1.36367	5.73811	15.519	8.18786e-05	0.00487933	PCBP4	ventral_progenitors_and_neurons_2
LMX1B	-5.98889	1.58066	15.5197	8.18477e-05	0.00487933	LMX1B	ventral_progenitors_and_neurons_2
AKT3	1.55762	7.02173	15.4879	8.32394e-05	0.00493923	AKT3	ventral_progenitors_and_neurons_2
PCP4L1	-2.54211	3.63854	15.4715	8.39623e-05	0.00494781	PCP4L1	ventral_progenitors_and_neurons_2
RORB	8.50421	5.24308	15.4685	8.40967e-05	0.00494781	RORB	ventral_progenitors_and_neurons_2
PCSK5	8.49712	5.23701	15.3884	8.77342e-05	0.00509703	PCSK5	ventral_progenitors_and_neurons_2
NBEA	1.67808	6.85617	15.3885	8.7731e-05	0.00509703	NBEA	ventral_progenitors_and_neurons_2
DDX56	3.60963	5.66813	15.1408	0.000100014	0.00573843	DDX56	ventral_progenitors_and_neurons_2
LCOR	1.02449	7.97362	15.0572	0.000104545	0.00597368	LCOR	ventral_progenitors_and_neurons_2
AL031777.3	8.45328	5.19485	14.9014	0.000113535	0.00640829	AL031777.3	ventral_progenitors_and_neurons_2
HDAC9	3.59217	5.65213	14.9024	0.000113476	0.00640829	HDAC9	ventral_progenitors_and_neurons_2
DBI	1.20875	7.53067	14.8375	0.000117447	0.00658376	DBI	ventral_progenitors_and_neurons_2
OBSL1	-1.80009	4.71584	14.8275	0.000118067	0.00658376	OBSL1	ventral_progenitors_and_neurons_2
ADAMTS3	8.44699	5.19009	14.833	0.000117726	0.00658376	ADAMTS3	ventral_progenitors_and_neurons_2
PCDH17	2.49159	6.10329	14.7739	0.000121468	0.00671948	PCDH17	ventral_progenitors_and_neurons_2
GPR12	8.43774	5.18108	14.7328	0.000124148	0.00684046	GPR12	ventral_progenitors_and_neurons_2
ONECUT2	-1.05981	6.56438	14.7225	0.000124824	0.0068505	ONECUT2	ventral_progenitors_and_neurons_2
NTRK3	1.72198	6.73376	14.6879	0.000127136	0.00694992	NTRK3	ventral_progenitors_and_neurons_2
RBFOX1	-3.10955	2.9478	14.6627	0.000128848	0.00701589	RBFOX1	ventral_progenitors_and_neurons_2
SDHC	-1.14819	6.26931	14.6437	0.000130149	0.00704811	SDHC	ventral_progenitors_and_neurons_2
SMAD2	1.47014	7.06108	14.6393	0.000130455	0.00704811	SMAD2	ventral_progenitors_and_neurons_2
DOCK9	3.56733	5.62868	14.5675	0.00013552	0.00726523	DOCK9	ventral_progenitors_and_neurons_2
SLC16A7	8.41963	5.16368	14.5384	0.000137631	0.00735002	SLC16A7	ventral_progenitors_and_neurons_2
CHN1	-2.13604	4.12226	14.4903	0.000141186	0.00751101	CHN1	ventral_progenitors_and_neurons_2
DIAPH1	2.84691	5.88486	14.4622	0.00014331	0.00759489	DIAPH1	ventral_progenitors_and_neurons_2
INO80D	1.19145	7.51449	14.3663	0.000150788	0.00793063	INO80D	ventral_progenitors_and_neurons_2
SSBP2	1.05545	7.80922	14.2769	0.000158116	0.00825353	SSBP2	ventral_progenitors_and_neurons_2
GNB4	3.54085	5.60334	14.2175	0.000163184	0.00848618	GNB4	ventral_progenitors_and_neurons_2
ADCY1	2.20962	6.23284	14.1764	0.00016679	0.00864135	ADCY1	ventral_progenitors_and_neurons_2
HSPA6	1.40343	7.11155	14.1406	0.000169988	0.00877431	HSPA6	ventral_progenitors_and_neurons_2
GABRA2	1.77958	6.60157	14.0495	0.000178421	0.00910802	GABRA2	ventral_progenitors_and_neurons_2
CACNA2D2	-2.08921	4.15549	14.0405	0.000179281	0.00911835	CACNA2D2	ventral_progenitors_and_neurons_2
NDUFA4L2	2.01728	6.35898	13.9113	0.000192023	0.0096954	NDUFA4L2	ventral_progenitors_and_neurons_2
AP1S2	-1.3949	5.50321	13.8777	0.000195487	0.00983454	AP1S2	ventral_progenitors_and_neurons_2
LBX1	-5.24063	1.68034	13.8281	0.000200712	0.010061	LBX1	ventral_progenitors_and_neurons_2
BCL11B	1.43199	7.02522	13.7724	0.000206743	0.010289	BCL11B	ventral_progenitors_and_neurons_2
FAM49A	1.86933	6.47204	13.6884	0.000216205	0.0106833	FAM49A	ventral_progenitors_and_neurons_2
ZSCAN30	8.3378	5.08645	13.6892	0.000216111	0.0106833	ZSCAN30	ventral_progenitors_and_neurons_2
AMD1	1.1167	7.57762	13.5256	0.000235776	0.0114868	AMD1	ventral_progenitors_and_neurons_2
ELOVL6	1.46613	6.93646	13.4417	0.000246556	0.0119284	ELOVL6	ventral_progenitors_and_neurons_2
CSAD	1.37018	7.07927	13.3761	0.000255318	0.0123094	CSAD	ventral_progenitors_and_neurons_2
STN1	-3.18414	2.77648	13.2954	0.000266539	0.0128059	STN1	ventral_progenitors_and_neurons_2
GOLGA8A	1.03527	7.73807	13.2421	0.000274233	0.0131301	GOLGA8A	ventral_progenitors_and_neurons_2
ADD2	1.73612	6.56087	13.2195	0.000277548	0.0132198	ADD2	ventral_progenitors_and_neurons_2
RAPGEF1	8.2888	5.03948	13.2028	0.00028004	0.0132708	RAPGEF1	ventral_progenitors_and_neurons_2
SESN3	1.9702	6.31454	13.0924	0.000297028	0.0138956	SESN3	ventral_progenitors_and_neurons_2
DLK1	-2.8412	3.09986	13.0911	0.000297226	0.0138956	DLK1	ventral_progenitors_and_neurons_2
ACTR2	1.1167	7.51384	12.9789	0.000315568	0.0146923	ACTR2	ventral_progenitors_and_neurons_2
NOL4	2.74153	5.78403	12.9681	0.0003174	0.0146923	NOL4	ventral_progenitors_and_neurons_2
CA9	3.44025	5.50746	12.9475	0.000320912	0.0148035	CA9	ventral_progenitors_and_neurons_2
PELI2	8.2601	5.01282	12.9256	0.000324682	0.0149279	PELI2	ventral_progenitors_and_neurons_2
RUNX1T1	1.13492	7.46104	12.8854	0.000331734	0.0152018	RUNX1T1	ventral_progenitors_and_neurons_2
RLIM	1.20995	7.30504	12.8566	0.00033687	0.0153359	RLIM	ventral_progenitors_and_neurons_2
CCDC32	8.24948	5.00242	12.8243	0.000342733	0.0155011	CCDC32	ventral_progenitors_and_neurons_2
C5orf24	1.43639	6.90825	12.8163	0.000344191	0.0155166	C5orf24	ventral_progenitors_and_neurons_2
TRIM2	1.05197	7.6396	12.7932	0.000348473	0.0156588	TRIM2	ventral_progenitors_and_neurons_2
SLC25A22	3.42653	5.49456	12.7815	0.000350666	0.0157064	SLC25A22	ventral_progenitors_and_neurons_2
QKI	1.17855	7.35557	12.7573	0.000355219	0.0158592	QKI	ventral_progenitors_and_neurons_2
CDO1	-1.85447	4.425	12.7248	0.000361455	0.0160345	CDO1	ventral_progenitors_and_neurons_2
ST8SIA3	-1.85495	4.42489	12.7303	0.000360379	0.0160345	ST8SIA3	ventral_progenitors_and_neurons_2
EN2	-4.75373	1.77351	12.6036	0.000385649	0.0168388	EN2	ventral_progenitors_and_neurons_2
TIPRL	1.0604	7.58937	12.5411	0.000398743	0.017356	TIPRL	ventral_progenitors_and_neurons_2
SYT14	1.8048	6.41123	12.5342	0.000400218	0.0173657	SYT14	ventral_progenitors_and_neurons_2
SLC25A33	-1.50544	5.09784	12.481	0.000411778	0.0176752	SLC25A33	ventral_progenitors_and_neurons_2
PRPF3	1.60903	6.6265	12.478	0.000412442	0.0176752	PRPF3	ventral_progenitors_and_neurons_2
PCP4	8.19941	4.95567	12.357	0.000440032	0.0187995	PCP4	ventral_progenitors_and_neurons_2
CCNT1	1.24912	7.16643	12.3351	0.000445227	0.0189051	CCNT1	ventral_progenitors_and_neurons_2
SSTR2	1.60035	6.61845	12.3172	0.00044951	0.0190288	SSTR2	ventral_progenitors_and_neurons_2
TAC1	-2.48539	3.45006	12.3092	0.000451435	0.0190522	TAC1	ventral_progenitors_and_neurons_2
FEM1B	1.15867	7.33602	12.28	0.000458552	0.0192356	FEM1B	ventral_progenitors_and_neurons_2
SLC16A1	1.9202	6.26766	12.2584	0.0004639	0.0193348	SLC16A1	ventral_progenitors_and_neurons_2
GJC1	8.1881	4.94447	12.2536	0.000465094	0.0193348	GJC1	ventral_progenitors_and_neurons_2
PTEN	1.46136	6.7986	12.2241	0.000472506	0.0195843	PTEN	ventral_progenitors_and_neurons_2
PIK3C3	1.2085	7.21933	12.1352	0.000495558	0.0204179	PIK3C3	ventral_progenitors_and_neurons_2
RPRM	2.6776	5.724	12.12	0.000499618	0.0205242	RPRM	ventral_progenitors_and_neurons_2
PLXDC2	2.67657	5.72253	12.1069	0.000503117	0.020607	PLXDC2	ventral_progenitors_and_neurons_2
CALB2	2.07583	6.10533	12.0235	0.000526144	0.0212369	CALB2	ventral_progenitors_and_neurons_2
LRRTM4	3.36143	5.43251	12.0168	0.00052804	0.0212517	LRRTM4	ventral_progenitors_and_neurons_2
NKAIN1	-1.98075	4.1391	11.9784	0.00053901	0.0215682	NKAIN1	ventral_progenitors_and_neurons_2
ZFPM2	8.15768	4.91656	11.9798	0.000538614	0.0215682	ZFPM2	ventral_progenitors_and_neurons_2
RPF2	2.65902	5.70554	11.8815	0.000567794	0.022461	RPF2	ventral_progenitors_and_neurons_2
ORC5	8.14686	4.9063	11.8837	0.000567111	0.022461	ORC5	ventral_progenitors_and_neurons_2
MPC2	1.30014	7.014	11.8586	0.000574816	0.02261	MPC2	ventral_progenitors_and_neurons_2
KCNT2	8.13595	4.89597	11.7876	0.000597122	0.0231593	KCNT2	ventral_progenitors_and_neurons_2
GMCL1	1.89157	6.24028	11.7977	0.00059391	0.0231593	GMCL1	ventral_progenitors_and_neurons_2
DENND5A	-1.55425	4.91223	11.7651	0.000604378	0.0233105	DENND5A	ventral_progenitors_and_neurons_2
TMOD2	1.43575	6.77519	11.7294	0.000616107	0.0236971	TMOD2	ventral_progenitors_and_neurons_2
SLCO3A1	3.33157	5.4041	11.6784	0.000633201	0.0242873	SLCO3A1	ventral_progenitors_and_neurons_2
FRA10AC1	1.75125	6.35947	11.6277	0.000650697	0.0248212	FRA10AC1	ventral_progenitors_and_neurons_2
TSHZ2	-1.74764	4.50854	11.632	0.000649205	0.0248212	TSHZ2	ventral_progenitors_and_neurons_2
SPIN1	1.28793	7.00179	11.6072	0.000657886	0.0250267	SPIN1	ventral_progenitors_and_neurons_2
FBXO41	8.114	4.87523	11.5964	0.000661742	0.0250362	FBXO41	ventral_progenitors_and_neurons_2
SCG5	-1.31618	5.45067	11.5573	0.000675789	0.0254291	SCG5	ventral_progenitors_and_neurons_2
MKLN1	1.24461	7.06506	11.4831	0.000703281	0.0263921	MKLN1	ventral_progenitors_and_neurons_2
HIST2H2BF	2.26863	5.89207	11.4554	0.000713837	0.026716	HIST2H2BF	ventral_progenitors_and_neurons_2
RAPGEF6	-1.38228	5.26669	11.4153	0.000729432	0.0272262	RAPGEF6	ventral_progenitors_and_neurons_2
RAP2A	1.737	6.34646	11.3936	0.000737966	0.0274709	RAP2A	ventral_progenitors_and_neurons_2
NUDT3	1.03271	7.50048	11.3734	0.000746054	0.0276977	NUDT3	ventral_progenitors_and_neurons_2
CHMP1B	-1.37312	5.27576	11.2909	0.000779932	0.0288015	CHMP1B	ventral_progenitors_and_neurons_2
EPC2	8.06958	4.83366	11.2185	0.000810936	0.0297879	EPC2	ventral_progenitors_and_neurons_2
DNAJC3	1.85194	6.20233	11.18	0.000827909	0.030172	DNAJC3	ventral_progenitors_and_neurons_2
RNPC3	1.61978	6.45115	11.1529	0.000840121	0.0305369	RNPC3	ventral_progenitors_and_neurons_2
GLRA2	-2.51439	3.29996	11.1417	0.000845203	0.0305934	GLRA2	ventral_progenitors_and_neurons_2
FAM57B	-1.03061	6.24938	11.1397	0.000846083	0.0305934	FAM57B	ventral_progenitors_and_neurons_2
CXXC4	-2.14684	3.80018	11.1337	0.000848825	0.0306128	CXXC4	ventral_progenitors_and_neurons_2
SLIT1	1.3514	6.82791	11.1283	0.000851303	0.0306226	SLIT1	ventral_progenitors_and_neurons_2
CNTFR	-1.16703	5.80366	11.056	0.000885167	0.0317585	CNTFR	ventral_progenitors_and_neurons_2
KDM3B	-1.61588	4.70098	11.0457	0.000890084	0.0318526	KDM3B	ventral_progenitors_and_neurons_2
GRHL1	3.27066	5.34659	11.0114	0.000906679	0.0322801	GRHL1	ventral_progenitors_and_neurons_2
ZC3H14	1.25859	6.97428	11.0138	0.000905515	0.0322801	ZC3H14	ventral_progenitors_and_neurons_2
EN1	-6.89291	1.23001	10.9666	0.000928855	0.0326127	EN1	ventral_progenitors_and_neurons_2
PAX3	-6.89369	1.23003	10.9685	0.000927902	0.0326127	PAX3	ventral_progenitors_and_neurons_2
OTP	-6.89214	1.22999	10.9647	0.00092981	0.0326127	OTP	ventral_progenitors_and_neurons_2
TLX1	-6.89214	1.22999	10.9647	0.00092981	0.0326127	TLX1	ventral_progenitors_and_neurons_2
PIAS2	1.52456	6.54626	10.9641	0.000930115	0.0326127	PIAS2	ventral_progenitors_and_neurons_2
ELOVL5	1.39398	6.73532	10.9506	0.000936929	0.0326665	ELOVL5	ventral_progenitors_and_neurons_2
PFKP	1.1269	7.22749	10.954	0.0009352	0.0326665	PFKP	ventral_progenitors_and_neurons_2
SHF	-1.68019	4.56063	10.9471	0.000938705	0.0326665	SHF	ventral_progenitors_and_neurons_2
POU2F1	1.15132	7.16541	10.8773	0.000974733	0.0335151	POU2F1	ventral_progenitors_and_neurons_2
CSNK1G1	2.22509	5.85065	10.8765	0.00097516	0.0335151	CSNK1G1	ventral_progenitors_and_neurons_2
FLNB	2.22322	5.84865	10.8525	0.000987851	0.033784	FLNB	ventral_progenitors_and_neurons_2
LONRF2	1.24977	6.96611	10.8388	0.000995181	0.0339511	LONRF2	ventral_progenitors_and_neurons_2
IER5L	-1.03153	6.20656	10.832	0.000998843	0.0339925	IER5L	ventral_progenitors_and_neurons_2
LMO7	3.24607	5.32284	10.7509	0.00104355	0.0351693	LMO7	ventral_progenitors_and_neurons_2
CCSAP	1.17364	7.09581	10.7073	0.00106845	0.0358343	CCSAP	ventral_progenitors_and_neurons_2
TNFSF9	-2.24565	3.61066	10.6994	0.00107302	0.0359008	TNFSF9	ventral_progenitors_and_neurons_2
MEIS1-AS2	-3.42402	2.359	10.6592	0.00109656	0.0364251	MEIS1-AS2	ventral_progenitors_and_neurons_2
LGI4	-2.24136	3.61117	10.6657	0.00109272	0.0364251	LGI4	ventral_progenitors_and_neurons_2
INPP5K	7.9996	4.76781	10.6464	0.0011042	0.0365042	INPP5K	ventral_progenitors_and_neurons_2
MGLL	7.98738	4.75617	10.5493	0.00116368	0.0381978	MGLL	ventral_progenitors_and_neurons_2
GAS7	7.98788	4.757	10.5534	0.00116113	0.0381978	GAS7	ventral_progenitors_and_neurons_2
MT3	1.10455	7.20523	10.4739	0.00121218	0.0396026	MT3	ventral_progenitors_and_neurons_2
ADCYAP1R1	7.97581	4.74569	10.4584	0.00122238	0.0398421	ADCYAP1R1	ventral_progenitors_and_neurons_2
C1QL2	-4.92471	1.57911	10.4061	0.00125745	0.0404424	C1QL2	ventral_progenitors_and_neurons_2
POU6F2	-4.92471	1.57911	10.4061	0.00125745	0.0404424	POU6F2	ventral_progenitors_and_neurons_2
CEP78	-1.12814	5.83629	10.4193	0.0012485	0.0404424	CEP78	ventral_progenitors_and_neurons_2
BLOC1S2	-1.08339	5.9766	10.4075	0.00125651	0.0404424	BLOC1S2	ventral_progenitors_and_neurons_2
ANKRD13A	-1.49698	4.88011	10.4247	0.00124488	0.0404424	ANKRD13A	ventral_progenitors_and_neurons_2
POU4F1	-4.92429	1.57927	10.4049	0.00125827	0.0404424	POU4F1	ventral_progenitors_and_neurons_2
RHOB	-1.06162	6.04567	10.377	0.00127741	0.0409626	RHOB	ventral_progenitors_and_neurons_2
KIAA1109	1.18985	7.01507	10.3703	0.00128207	0.0410126	KIAA1109	ventral_progenitors_and_neurons_2
RNASEH2B	2.5321	5.58488	10.3394	0.00130368	0.0415173	RNASEH2B	ventral_progenitors_and_neurons_2
CXXC5	-1.43225	5.01251	10.3026	0.00132994	0.0421602	CXXC5	ventral_progenitors_and_neurons_2
XPR1	1.00546	7.41073	10.2857	0.00134216	0.0424407	XPR1	ventral_progenitors_and_neurons_2
EBLN3P	1.79166	6.14522	10.282	0.0013449	0.0424407	EBLN3P	ventral_progenitors_and_neurons_2
NR4A2	3.19799	5.27761	10.2554	0.00136436	0.0427634	NR4A2	ventral_progenitors_and_neurons_2
BHLHE40	-1.88933	4.10173	10.2289	0.0013841	0.043187	BHLHE40	ventral_progenitors_and_neurons_2
CUL7	3.19014	5.27041	10.1763	0.00142415	0.0441828	CUL7	ventral_progenitors_and_neurons_2
PRKCA	2.51772	5.57095	10.1745	0.00142556	0.0441828	PRKCA	ventral_progenitors_and_neurons_2
FNDC5	-3.29263	2.41774	10.1696	0.00142934	0.0442013	FNDC5	ventral_progenitors_and_neurons_2
LCORL	1.40556	6.59928	10.1207	0.00146773	0.0452877	LCORL	ventral_progenitors_and_neurons_2
SRGAP2	2.51159	5.56544	10.1046	0.00148065	0.0455525	SRGAP2	ventral_progenitors_and_neurons_2
WSB2	-1.08413	5.92795	10.0684	0.00150995	0.0462819	WSB2	ventral_progenitors_and_neurons_2
INTU	1.3435	6.68714	10.0532	0.00152249	0.046461	INTU	ventral_progenitors_and_neurons_2
DTD1	-1.04291	6.05995	10.0532	0.00152247	0.046461	DTD1	ventral_progenitors_and_neurons_2
ASXL3	-1.2432	5.45015	10.0255	0.00154557	0.046959	ASXL3	ventral_progenitors_and_neurons_2
C2CD4C	-2.55508	3.13312	10.0209	0.0015494	0.0469726	C2CD4C	ventral_progenitors_and_neurons_2
NR1D2	2.50016	5.55571	9.97519	0.00158833	0.0480479	NR1D2	ventral_progenitors_and_neurons_2
NRP2	1.64553	6.26016	9.96693	0.00159547	0.0480545	NRP2	ventral_progenitors_and_neurons_2
SIK3	2.49974	5.55508	9.97046	0.00159242	0.0480545	SIK3	ventral_progenitors_and_neurons_2
OTUD5	1.76903	6.12346	9.95851	0.00160279	0.0481704	OTUD5	ventral_progenitors_and_neurons_2
KCNC4	7.90205	4.67727	9.89329	0.00166058	0.0493717	KCNC4	ventral_progenitors_and_neurons_2
FARSB	1.54223	6.37696	9.90053	0.00165406	0.0493717	FARSB	ventral_progenitors_and_neurons_2
PEAK1	7.90154	4.67643	9.88939	0.0016641	0.0493717	PEAK1	ventral_progenitors_and_neurons_2
SCGB1B2P	-2.8239	2.81986	9.89411	0.00165984	0.0493717	SCGB1B2P	ventral_progenitors_and_neurons_2
RYR1	7.90163	4.67657	9.89004	0.00166351	0.0493717	RYR1	ventral_progenitors_and_neurons_2

## Sheet: eRGCs
	logFC	logCPM	F	p_val	p_adj	gene	cluster_id
DCN	6.92819	5.21562	489.354	1.60515e-08	0.000224094	DCN	RGCs_early
GCNT1	5.28698	4.70704	288.776	1.29928e-07	0.000475585	GCNT1	RGCs_early
NDUFA4L2	3.93026	7.12696	314.413	9.28739e-08	0.000475585	NDUFA4L2	RGCs_early
PLCG2	3.05165	5.9926	285.311	1.36261e-07	0.000475585	PLCG2	RGCs_early
ZNF703	-3.23575	6.1339	268.714	1.72541e-07	0.000481768	ZNF703	RGCs_early
MT3	1.75745	9.18788	225.33	3.44463e-07	0.000801509	MT3	RGCs_early
CYP26A1	-7.7297	5.98666	213.393	4.26225e-07	0.000850075	CYP26A1	RGCs_early
S100B	2.37727	7.50045	187.508	7.05822e-07	0.00123175	S100B	RGCs_early
FOXP2	-3.21934	4.9752	173.839	9.47214e-07	0.00146934	FOXP2	RGCs_early
DBI	1.84133	8.95026	164.8	1.16503e-06	0.00147864	DBI	RGCs_early
HOTAIRM1	-4.29184	4.74605	168.696	1.06419e-06	0.00147864	HOTAIRM1	RGCs_early
COL1A2	-4.4076	4.85555	143.027	2.01311e-06	0.00214133	COL1A2	RGCs_early
DDIT3	1.92734	6.73289	140.647	2.14731e-06	0.00214133	DDIT3	RGCs_early
GFAP	5.44244	4.92335	143.821	1.97069e-06	0.00214133	GFAP	RGCs_early
LY6H	1.75154	7.51646	125.176	3.35639e-06	0.00299443	LY6H	RGCs_early
CRABP1	-2.24345	7.58604	124.451	3.43176e-06	0.00299443	CRABP1	RGCs_early
ATF5	1.80962	6.23887	121.506	3.76031e-06	0.0030881	ATF5	RGCs_early
NUPR1	6.43789	4.7867	117.809	4.23024e-06	0.00310834	NUPR1	RGCs_early
MT2A	2.34481	6.97235	119.286	4.03418e-06	0.00310834	MT2A	RGCs_early
WNT2B	2.21571	4.99926	111.444	5.22483e-06	0.00315338	WNT2B	RGCs_early
TAGLN3	-2.23881	7.02865	108.333	5.81725e-06	0.00315338	TAGLN3	RGCs_early
CENPW	1.9015	6.12638	114.223	4.7582e-06	0.00315338	CENPW	RGCs_early
CLU	1.46895	9.91968	106.519	6.20131e-06	0.00315338	CLU	RGCs_early
CA9	3.9975	3.7187	107.017	6.09281e-06	0.00315338	CA9	RGCs_early
PBX3	-1.80604	6.23823	107.012	6.09375e-06	0.00315338	PBX3	RGCs_early
HEPN1	8.8712	3.35583	148.071	5.2611e-06	0.00315338	HEPN1	RGCs_early
SCG3	1.91349	6.69844	112.274	5.07978e-06	0.00315338	SCG3	RGCs_early
MT-ATP6	-1.0025	12.6649	105.967	6.32438e-06	0.00315338	MT-ATP6	RGCs_early
APOE	3.43598	6.21749	104.966	6.5556e-06	0.00315596	APOE	RGCs_early
CALM1	1.08373	10.2306	99.0806	8.15089e-06	0.00379315	CALM1	RGCs_early
CD24	-2.1921	7.5261	96.3835	9.04308e-06	0.0040726	CD24	RGCs_early
PUS7L	-9.98576	4.5929	123.74	9.66004e-06	0.0042145	PUS7L	RGCs_early
BTF3	-1.32346	9.19634	92.4911	1.05569e-05	0.00432253	BTF3	RGCs_early
BBOX1	2.74674	4.02698	92.7297	1.04554e-05	0.00432253	BBOX1	RGCs_early
SHTN1	1.99103	4.90987	91.8482	1.08365e-05	0.00432253	SHTN1	RGCs_early
CCNG1	-1.70338	6.18903	91.0319	1.1205e-05	0.00434537	CCNG1	RGCs_early
FYB2	3.75872	3.78785	87.0624	1.32375e-05	0.00453395	FYB2	RGCs_early
TXNIP	-1.19259	8.80921	88.849	1.22702e-05	0.00453395	TXNIP	RGCs_early
PAX3	-1.95841	6.08767	86.6334	1.34838e-05	0.00453395	PAX3	RGCs_early
2022-09-07	1.14679	9.45638	86.7615	1.34096e-05	0.00453395	2022-09-07	RGCs_early
GAS1	-2.62412	6.32496	85.437	1.42015e-05	0.00453395	GAS1	RGCs_early
CDKN1C	-1.83194	5.10553	85.2957	1.42894e-05	0.00453395	CDKN1C	RGCs_early
IFIT2	4.29683	3.14456	86.0993	1.37985e-05	0.00453395	IFIT2	RGCs_early
PCDH8	-2.00795	4.96689	88.5192	1.2442e-05	0.00453395	PCDH8	RGCs_early
KIF1A	1.28708	7.30402	80.4234	1.77823e-05	0.00461792	KIF1A	RGCs_early
FEZF2	2.85729	5.77078	82.1552	1.643e-05	0.00461792	FEZF2	RGCs_early
ARX	2.20564	5.22957	81.7666	1.67219e-05	0.00461792	ARX	RGCs_early
OPHN1	2.05595	5.00276	82.4688	1.6199e-05	0.00461792	OPHN1	RGCs_early
PLS3	1.80264	5.24226	80.3795	1.78182e-05	0.00461792	PLS3	RGCs_early
RPL4	-1.09568	9.75087	80.6429	1.76033e-05	0.00461792	RPL4	RGCs_early
ACSS1	3.21376	4.00789	80.3267	1.78617e-05	0.00461792	ACSS1	RGCs_early
EIF2S2	1.19282	8.13469	82.9234	1.58713e-05	0.00461792	EIF2S2	RGCs_early
AC010319.3	3.78165	4.97369	80.4562	1.77553e-05	0.00461792	AC010319.3	RGCs_early
ZNF738	-1.73119	5.56815	82.0076	1.65401e-05	0.00461792	ZNF738	RGCs_early
MARCKSL1	-1.01516	10.0957	78.2007	1.97279e-05	0.00485034	MARCKSL1	RGCs_early
HOXB2	-3.61576	3.79245	78.5274	1.94258e-05	0.00485034	HOXB2	RGCs_early
TMEM158	-1.85016	5.81671	76.8371	2.10539e-05	0.00486295	TMEM158	RGCs_early
GABRB1	4.47284	3.47196	77.3279	2.05641e-05	0.00486295	GABRB1	RGCs_early
MIR124-2HG	-2.7911	4.13131	76.6467	2.12478e-05	0.00486295	MIR124-2HG	RGCs_early
SAMD1	1.63041	6.0903	76.8417	2.10492e-05	0.00486295	SAMD1	RGCs_early
S100A13	-1.85932	6.60715	76.2789	2.16286e-05	0.00487027	S100A13	RGCs_early
TCEAL2	1.26953	6.87577	74.2936	2.38383e-05	0.0052001	TCEAL2	RGCs_early
MEIS1	-2.33942	5.94294	73.8582	2.43599e-05	0.00523214	MEIS1	RGCs_early
ITGB8	-1.22037	7.05749	72.6804	2.58444e-05	0.00538527	ITGB8	RGCs_early
PRR34-AS1	2.89112	3.81001	72.8878	2.55749e-05	0.00538527	PRR34-AS1	RGCs_early
TSPAN7	1.37186	6.21378	71.2838	2.7754e-05	0.00569814	TSPAN7	RGCs_early
PTX3	-2.03416	5.19939	70.1958	2.93648e-05	0.00594148	PTX3	RGCs_early
CASZ1	-2.65316	4.17198	69.5811	3.03267e-05	0.00604844	CASZ1	RGCs_early
RSPO2	3.48297	6.35435	69.0465	3.11951e-05	0.00613401	RSPO2	RGCs_early
DMRT3	2.63174	3.80806	67.1746	3.44919e-05	0.00650732	DMRT3	RGCs_early
IGDCC3	-1.66395	5.64992	67.2369	3.43755e-05	0.00650732	IGDCC3	RGCs_early
RCN2	-1.06786	8.23588	65.8008	3.71916e-05	0.00692309	RCN2	RGCs_early
MSX2	-3.57003	3.35793	65.3907	3.8048e-05	0.00698932	MSX2	RGCs_early
NFIC	2.0076	5.65714	64.9436	3.901e-05	0.00707297	NFIC	RGCs_early
CST3	1.4752	8.36733	64.4952	4.00055e-05	0.00716048	CST3	RGCs_early
NMU	2.12281	5.01579	63.3472	4.27028e-05	0.0073028	NMU	RGCs_early
RNF130	-1.20646	6.57187	63.352	4.2691e-05	0.0073028	RNF130	RGCs_early
MSRA	2.06008	5.13007	63.4892	4.23571e-05	0.0073028	MSRA	RGCs_early
ZIC2	-1.77985	7.30754	63.0586	4.34161e-05	0.0073028	ZIC2	RGCs_early
SPRY1	1.68553	6.9129	62.3371	4.5266e-05	0.00731548	SPRY1	RGCs_early
PCBP2	-1.0385	8.14245	62.2154	4.55875e-05	0.00731548	PCBP2	RGCs_early
NXPH4	3.48178	4.97802	62.746	4.42058e-05	0.00731548	NXPH4	RGCs_early
SULF2	2.89645	5.31039	62.2731	4.54347e-05	0.00731548	SULF2	RGCs_early
MEGF11	3.96641	3.03358	61.8126	4.66726e-05	0.0074045	MEGF11	RGCs_early
HNRNPH1	-1.18746	7.36044	61.0046	4.89481e-05	0.00744957	HNRNPH1	RGCs_early
CNTNAP2	1.22485	7.74483	60.7546	4.96801e-05	0.00744957	CNTNAP2	RGCs_early
WNT8B	3.45154	3.09948	60.8329	4.94492e-05	0.00744957	WNT8B	RGCs_early
DLK1	-4.81001	6.08697	61.221	4.83253e-05	0.00744957	DLK1	RGCs_early
THSD4	-2.19204	4.71306	61.412	4.77839e-05	0.00744957	THSD4	RGCs_early
SOCS3	-4.51843	5.10764	60.5937	5.01583e-05	0.00744957	SOCS3	RGCs_early
NFIX	3.91947	5.79215	59.0694	5.49875e-05	0.00808084	NFIX	RGCs_early
IGSF10	2.1518	4.02014	58.6947	5.62625e-05	0.00809774	IGSF10	RGCs_early
MSI1	-2.1411	6.01497	58.7698	5.6004e-05	0.00809774	MSI1	RGCs_early
DOK6	2.50944	4.39091	58.4864	5.69871e-05	0.00811834	DOK6	RGCs_early
PPP1R1A	-2.43302	6.22676	58.2259	5.79098e-05	0.00816645	PPP1R1A	RGCs_early
AL078639.1	1.56439	5.07936	57.7047	5.98128e-05	0.00826779	AL078639.1	RGCs_early
SDK2	-1.77289	5.09985	56.9732	6.26168e-05	0.00848731	SDK2	RGCs_early
ZNF350	-5.47016	3.11824	57.074	6.22208e-05	0.00848731	ZNF350	RGCs_early
LYN	3.86752	3.72789	56.6801	6.37863e-05	0.0085627	LYN	RGCs_early
SCRG1	1.52702	6.02217	56.0233	6.65078e-05	0.00875354	SCRG1	RGCs_early
LIMD2	-1.26742	5.68339	56.1621	6.59206e-05	0.00875354	LIMD2	RGCs_early
ZIC5	-1.67835	5.046	55.6245	6.82307e-05	0.00882009	ZIC5	RGCs_early
PLOD1	1.73357	4.44069	55.032	7.0895e-05	0.0089168	PLOD1	RGCs_early
SERPINI1	2.42252	4.19788	55.078	7.06836e-05	0.0089168	SERPINI1	RGCs_early
RASSF9	4.02626	3.21488	55.0969	7.05971e-05	0.0089168	RASSF9	RGCs_early
HEY2	2.2082	5.05628	53.9609	7.60496e-05	0.00931341	HEY2	RGCs_early
CPXM2	5.3606	2.76652	54.0934	7.53871e-05	0.00931341	CPXM2	RGCs_early
HSPH1	1.18437	6.16121	54.2135	7.47931e-05	0.00931341	HSPH1	RGCs_early
PRRT2	-1.27831	6.01038	53.6861	7.74468e-05	0.00940204	PRRT2	RGCs_early
CYR61	-2.61824	5.77341	52.857	8.18608e-05	0.00976803	CYR61	RGCs_early
EPN2	1.12153	6.47253	52.2609	8.52297e-05	0.0100838	EPN2	RGCs_early
NECTIN3	-1.36016	5.63259	51.6425	8.89091e-05	0.0103659	NECTIN3	RGCs_early
MEIS2	-1.37885	7.52148	51.6115	8.90989e-05	0.0103659	MEIS2	RGCs_early
TMSB15A	-1.06537	7.60084	50.8338	9.40251e-05	0.0105862	TMSB15A	RGCs_early
GPC3	-3.19076	4.01518	50.8761	9.37485e-05	0.0105862	GPC3	RGCs_early
CCND1	-1.60225	5.73268	51.0541	9.25957e-05	0.0105862	CCND1	RGCs_early
MTA1	-1.50215	5.42252	51.0035	9.2922e-05	0.0105862	MTA1	RGCs_early
C2orf40	2.46552	3.41566	50.5368	9.5996e-05	0.0107022	C2orf40	RGCs_early
PTPRA	1.04662	7.99816	50.449	9.65884e-05	0.0107022	PTPRA	RGCs_early
VGLL3	-3.45161	4.61033	49.8624	0.000100666	0.0109025	VGLL3	RGCs_early
NDN	-1.05841	7.81331	49.9117	0.000100316	0.0109025	NDN	RGCs_early
RPRML	-3.35723	3.45323	49.7433	0.000101521	0.0109025	RPRML	RGCs_early
C21orf62	5.82053	3.81089	49.8188	0.000100978	0.0109025	C21orf62	RGCs_early
SOX6	2.08903	5.88173	49.016	0.000106937	0.0113965	SOX6	RGCs_early
AL354733.3	2.45034	3.75726	48.3109	0.000112536	0.0117332	AL354733.3	RGCs_early
CLDN5	2.16957	3.66898	48.301	0.000112617	0.0117332	CLDN5	RGCs_early
SHISA9	2.75927	3.45735	47.774	0.000117046	0.0121043	SHISA9	RGCs_early
VANGL2	-1.24783	5.86814	47.5984	0.00011857	0.0121718	VANGL2	RGCs_early
PLPPR3	-1.0108	7.00864	47.2068	0.000122059	0.0124384	PLPPR3	RGCs_early
NEFM	-1.64382	4.52615	46.9758	0.000124177	0.0125555	NEFM	RGCs_early
CADPS	1.93308	5.89668	46.3277	0.000130369	0.0125823	CADPS	RGCs_early
EFCC1	-1.6369	4.9413	46.4319	0.000129348	0.0125823	EFCC1	RGCs_early
DLL1	-2.32594	5.33441	46.1476	0.000132158	0.0125823	DLL1	RGCs_early
NPTX2	-1.80087	4.64349	46.6722	0.000127032	0.0125823	NPTX2	RGCs_early
ST7-AS1	-1.89091	4.23297	46.435	0.000129318	0.0125823	ST7-AS1	RGCs_early
MED17	-1.23215	5.41551	46.2954	0.000130688	0.0125823	MED17	RGCs_early
LGALS3	1.31462	6.01973	46.5931	0.000127788	0.0125823	LGALS3	RGCs_early
ANGPT1	-2.79936	3.81409	45.7983	0.000135717	0.0128023	ANGPT1	RGCs_early
CEMIP2	-2.42075	4.4611	45.1639	0.000142489	0.0132093	CEMIP2	RGCs_early
PNP	1.90075	4.13779	45.1293	0.00014287	0.0132093	PNP	RGCs_early
HOPX	3.2088	6.35588	44.8204	0.000146332	0.0132647	HOPX	RGCs_early
SFRP2	-2.73182	6.36546	44.4121	0.00015107	0.0132647	SFRP2	RGCs_early
CDKN1A	-4.16812	3.78387	44.575	0.000149158	0.0132647	CDKN1A	RGCs_early
MDM1	1.32195	4.91979	44.4406	0.000150734	0.0132647	MDM1	RGCs_early
NTS	3.18274	4.99694	44.7275	0.000147394	0.0132647	NTS	RGCs_early
NETO2	-1.44123	5.19125	44.7114	0.000147579	0.0132647	NETO2	RGCs_early
SEZ6L2	1.27285	5.44606	44.1937	0.000153684	0.0134099	SEZ6L2	RGCs_early
ID2	-1.10948	8.20072	44.0891	0.000154955	0.0134368	ID2	RGCs_early
TAGLN2	1.50435	5.91248	43.3446	0.000164395	0.0137755	TAGLN2	RGCs_early
CRISPLD1	-1.66294	6.1962	43.327	0.000164627	0.0137755	CRISPLD1	RGCs_early
ARHGAP20	3.50163	2.787	43.3965	0.000163714	0.0137755	ARHGAP20	RGCs_early
GAS7	2.20883	3.83417	43.3153	0.000164781	0.0137755	GAS7	RGCs_early
ALYREF	-1.28371	5.7996	43.4044	0.000163611	0.0137755	ALYREF	RGCs_early
ZFP28	-7.77141	2.66841	52.4579	0.000161369	0.0137755	ZFP28	RGCs_early
CPNE8	-2.4141	3.61098	43.1371	0.000167153	0.0138906	CPNE8	RGCs_early
EPHX1	2.0891	4.72653	42.747	0.000172496	0.0139095	EPHX1	RGCs_early
ICA1	-3.22646	4.42822	42.6187	0.000174299	0.0139095	ICA1	RGCs_early
PRAG1	-1.30994	5.16506	42.6149	0.000174354	0.0139095	PRAG1	RGCs_early
TLN1	1.15665	5.47744	42.9506	0.000169681	0.0139095	TLN1	RGCs_early
PTGR1	-1.61124	5.70152	42.807	0.000171661	0.0139095	PTGR1	RGCs_early
TDP1	1.86021	4.76901	42.625	0.000174211	0.0139095	TDP1	RGCs_early
GOLGA8A	1.49896	5.03152	42.6424	0.000173965	0.0139095	GOLGA8A	RGCs_early
CDKL2	1.6507	4.41511	42.421	0.000177126	0.0139752	CDKL2	RGCs_early
PRUNE2	2.13276	3.80754	42.4173	0.00017718	0.0139752	PRUNE2	RGCs_early
EBF1	-4.47779	3.54153	42.2176	0.000180092	0.0140462	EBF1	RGCs_early
ZFHX3	-1.47233	4.88485	42.2841	0.000179115	0.0140462	ZFHX3	RGCs_early
RSPO3	3.65237	8.27567	42.147	0.000181137	0.0140492	RSPO3	RGCs_early
METRN	1.19126	8.83593	42.0219	0.000183007	0.0141158	METRN	RGCs_early
CAMK2B	2.28774	3.88981	41.6628	0.000188508	0.0141226	CAMK2B	RGCs_early
EGFR	2.25304	3.76559	41.8984	0.000184876	0.0141226	EGFR	RGCs_early
PTCHD1	3.17538	3.13224	41.565	0.000190042	0.0141226	PTCHD1	RGCs_early
BHLHE41	3.92776	5.8685	41.5727	0.00018992	0.0141226	BHLHE41	RGCs_early
PCSK6	3.87266	2.83456	41.8496	0.000185621	0.0141226	PCSK6	RGCs_early
TRIM47	3.19639	3.57438	41.4798	0.00019139	0.0141226	TRIM47	RGCs_early
MIDN	-1.1091	6.665	41.4291	0.000192199	0.0141226	MIDN	RGCs_early
RORA	1.12453	6.14543	41.2248	0.0001955	0.0142155	RORA	RGCs_early
AL359091.1	-5.08051	3.61405	41.0723	0.00019801	0.0142867	AL359091.1	RGCs_early
EFNB3	-1.21758	5.85906	41.0413	0.000198525	0.0142867	EFNB3	RGCs_early
NHLH2	-3.82541	3.00453	40.8967	0.00020095	0.014387	NHLH2	RGCs_early
RMDN2-AS1	-7.97984	2.9381	48.5816	0.000205565	0.014568	RMDN2-AS1	RGCs_early
ZNF521	-1.11054	5.53531	40.6498	0.000205178	0.014568	ZNF521	RGCs_early
MYCL	-2.27606	3.78628	40.2977	0.0002114	0.0148309	MYCL	RGCs_early
KCTD6	1.06928	5.86454	39.9787	0.000217242	0.0150144	KCTD6	RGCs_early
ALCAM	2.25494	4.20868	39.9902	0.000217029	0.0150144	ALCAM	RGCs_early
P4HA1	1.05776	7.71083	40.0447	0.000216018	0.0150144	P4HA1	RGCs_early
SVBP	-1.26372	6.39717	39.566	0.000225101	0.0151089	SVBP	RGCs_early
PAM	-1.12849	5.79669	39.6347	0.000223769	0.0151089	PAM	RGCs_early
NDRG2	2.32675	5.74547	39.6628	0.000223226	0.0151089	NDRG2	RGCs_early
ACTN1	1.18849	5.54543	39.5828	0.000224776	0.0151089	ACTN1	RGCs_early
MT1X	3.53465	4.71703	39.7107	0.000222307	0.0151089	MT1X	RGCs_early
RGS16	1.54078	5.34785	39.263	0.0002311	0.0151474	RGS16	RGCs_early
STC2	1.93152	5.79797	39.4802	0.00022678	0.0151474	STC2	RGCs_early
ZDHHC14	2.21078	3.57359	39.2911	0.000230536	0.0151474	ZDHHC14	RGCs_early
AFDN-DT	-1.88469	5.41016	39.3238	0.000229881	0.0151474	AFDN-DT	RGCs_early
SSPN	1.42643	4.81945	39.3779	0.000228803	0.0151474	SSPN	RGCs_early
TENM3	-1.27299	5.38408	38.7151	0.00024246	0.0154565	TENM3	RGCs_early
ANKRD37	1.14023	5.52831	38.7637	0.000241424	0.0154565	ANKRD37	RGCs_early
CXCL12	4.30182	2.29741	38.7232	0.000242287	0.0154565	CXCL12	RGCs_early
CYP26C1	-8.1041	2.86009	46.1833	0.000240872	0.0154565	CYP26C1	RGCs_early
WSCD1	1.35341	5.04765	38.8825	0.000238918	0.0154565	WSCD1	RGCs_early
EFNA5	-1.46215	4.55357	38.3552	0.000250305	0.0156564	EFNA5	RGCs_early
TENT5A	-1.57065	4.81876	38.3219	0.000251045	0.0156564	TENT5A	RGCs_early
EN2	-3.25242	4.45649	38.235	0.000252994	0.0156564	EN2	RGCs_early
CD44	1.34667	5.01899	38.3249	0.000250978	0.0156564	CD44	RGCs_early
C11orf96	1.48388	5.47581	38.2373	0.000252942	0.0156564	C11orf96	RGCs_early
TCF12	-1.11265	6.88046	38.215	0.000253445	0.0156564	TCF12	RGCs_early
FAM171B	1.52341	6.89562	38.1642	0.000254595	0.0156581	FAM171B	RGCs_early
PDPN	-1.63052	5.21767	37.7017	0.000265372	0.0160512	PDPN	RGCs_early
MEX3B	-1.36502	4.8164	37.6929	0.000265584	0.0160512	MEX3B	RGCs_early
HOXB-AS1	-2.56191	3.6395	37.7261	0.00026479	0.0160512	HOXB-AS1	RGCs_early
TEAD2	-1.51141	5.15646	37.7298	0.000264702	0.0160512	TEAD2	RGCs_early
IER5	-1.05174	5.56	37.4462	0.000271572	0.01617	IER5	RGCs_early
CNPY1	-2.27863	4.04436	37.4214	0.000272183	0.01617	CNPY1	RGCs_early
MN1	-1.1978	5.21618	37.5376	0.000269333	0.01617	MN1	RGCs_early
NOTCH1	-1.01524	6.2107	37.2053	0.000277582	0.0162892	NOTCH1	RGCs_early
UAP1L1	5.28228	1.87348	37.1688	0.000278506	0.0162892	UAP1L1	RGCs_early
MAGEL2	-2.47993	3.4751	37.155	0.000278857	0.0162892	MAGEL2	RGCs_early
ACKR3	-1.75827	3.97856	37.0902	0.000280512	0.0163176	ACKR3	RGCs_early
CDR1	3.32237	2.71407	36.8571	0.000286565	0.016583	CDR1	RGCs_early
JOSD2	1.54009	4.22141	36.7787	0.000288638	0.016583	JOSD2	RGCs_early
ZNRF3	-1.38614	4.92094	36.7897	0.000288348	0.016583	ZNRF3	RGCs_early
IRS1	1.62642	4.23999	36.4593	0.000297279	0.0168603	IRS1	RGCs_early
PCBP4	-1.11575	5.36369	36.4615	0.000297218	0.0168603	PCBP4	RGCs_early
MEF2C	1.91337	5.06455	36.3371	0.000300671	0.0168603	MEF2C	RGCs_early
ANGPTL2	3.1561	3.89908	36.4014	0.00029888	0.0168603	ANGPTL2	RGCs_early
COMT	-1.05489	6.2499	36.2925	0.000301918	0.0168603	COMT	RGCs_early
IRAK4	-7.46175	2.45485	42.5578	0.00031052	0.0172031	IRAK4	RGCs_early
NCOA7	1.42039	4.53788	35.815	0.000315713	0.0174113	NCOA7	RGCs_early
PCDH18	-2.14899	4.99099	35.7002	0.000319145	0.0174729	PCDH18	RGCs_early
EMP2	1.37314	4.42162	35.2917	0.000331747	0.0180215	EMP2	RGCs_early
DRAXIN	-1.08959	6.10544	35.2476	0.000333142	0.0180271	DRAXIN	RGCs_early
GK5	-1.23253	5.0357	35.0821	0.000338452	0.0181484	GK5	RGCs_early
CSKMT	1.38524	4.7418	35.0752	0.000338676	0.0181484	CSKMT	RGCs_early
TTC9B	1.58312	4.95671	35.0565	0.000339283	0.0181484	TTC9B	RGCs_early
C2orf49	1.2054	5.80084	34.9684	0.000342159	0.018163	C2orf49	RGCs_early
LYSMD2	3.37373	2.58905	34.9265	0.000343538	0.0181672	LYSMD2	RGCs_early
REV3L	1.58369	5.81496	34.8433	0.000346299	0.0182441	REV3L	RGCs_early
CARS	1.02628	5.49942	34.5377	0.000356677	0.0187202	CARS	RGCs_early
TMOD1	4.61424	3.64283	34.0861	0.000372732	0.0194168	TMOD1	RGCs_early
LINC00672	-1.63086	4.72304	33.9014	0.000379557	0.0196989	LINC00672	RGCs_early
TUBA4A	2.81501	3.17889	33.7565	0.000385022	0.0197621	TUBA4A	RGCs_early
FGF9	-2.85223	3.40702	33.7617	0.000384824	0.0197621	FGF9	RGCs_early
GPX7	-1.58304	4.26805	33.6813	0.000387898	0.0198368	GPX7	RGCs_early
LGI1	2.86013	3.86748	33.6242	0.000390098	0.0198765	LGI1	RGCs_early
SYT14	2.03022	3.89457	33.4155	0.000398278	0.0200901	SYT14	RGCs_early
SNRNP27	1.02124	6.55239	33.4072	0.000398607	0.0200901	SNRNP27	RGCs_early
TFAP2B	-3.74183	4.30831	33.3362	0.00040144	0.0201229	TFAP2B	RGCs_early
FBXW11	1.07102	6.52072	33.189	0.000407395	0.0202159	FBXW11	RGCs_early
EMX2OS	2.22767	3.87342	33.0954	0.00041124	0.0202159	EMX2OS	RGCs_early
AKT1	-1.08722	5.59135	33.1195	0.000410245	0.0202159	AKT1	RGCs_early
RFX1	1.81131	4.18315	33.1643	0.000408406	0.0202159	RFX1	RGCs_early
ARL4A	-1.71377	6.08102	33.059	0.000412745	0.0202187	ARL4A	RGCs_early
RND3	-1.4334	7.78895	32.7217	0.000427048	0.020401	RND3	RGCs_early
ERBB4	-1.65713	5.65485	32.4641	0.000438386	0.020401	ERBB4	RGCs_early
QARS	-1.16168	5.6877	32.5117	0.000436264	0.020401	QARS	RGCs_early
KCTD8	4.21114	2.22464	32.559	0.000434164	0.020401	KCTD8	RGCs_early
ABCF1	1.04702	6.57276	32.8535	0.000421387	0.020401	ABCF1	RGCs_early
NEFL	-2.28279	4.58667	32.6392	0.000430639	0.020401	NEFL	RGCs_early
MED30	-1.16065	5.04991	32.6045	0.000432161	0.020401	MED30	RGCs_early
ARRDC4	-2.43241	3.83403	32.4847	0.000437465	0.020401	ARRDC4	RGCs_early
NOL3	1.55693	5.73559	32.9232	0.000418432	0.020401	NOL3	RGCs_early
DCC	-1.87908	4.83959	32.5615	0.000434055	0.020401	DCC	RGCs_early
DMD	1.13829	5.17755	32.2874	0.000446382	0.0204998	DMD	RGCs_early
NEXMIF	1.52235	4.18397	32.3109	0.000445309	0.0204998	NEXMIF	RGCs_early
FOXB1	1.58414	4.39325	32.3062	0.000445523	0.0204998	FOXB1	RGCs_early
TLN2	1.46864	4.34027	32.0386	0.000457955	0.0208938	TLN2	RGCs_early
GPC2	-1.09278	5.36075	32.0005	0.000459755	0.0209076	GPC2	RGCs_early
VSTM2A	-3.15731	3.03834	31.8284	0.000468022	0.0211458	VSTM2A	RGCs_early
GABBR1	1.14609	5.30301	31.5657	0.000480994	0.0215078	GABBR1	RGCs_early
GADD45G	1.53766	5.47296	31.5457	0.000482	0.0215078	GADD45G	RGCs_early
ABCC4	2.31313	3.22671	31.5419	0.000482196	0.0215078	ABCC4	RGCs_early
ATAD2	1.6899	4.22983	31.4864	0.000485001	0.021564	ATAD2	RGCs_early
AHNAK	1.17929	4.95075	31.4511	0.000486794	0.021575	AHNAK	RGCs_early
ARFGEF3	1.85083	3.78833	31.2688	0.000496203	0.0217392	ARFGEF3	RGCs_early
DGKB	3.37863	2.82927	31.2588	0.000496727	0.0217392	DGKB	RGCs_early
AL136088.1	4.32816	2.32783	31.2887	0.000495169	0.0217392	AL136088.1	RGCs_early
CTTNBP2	1.78904	4.13189	31.1608	0.000501886	0.0218281	CTTNBP2	RGCs_early
ELFN1	-1.82817	3.59901	31.0321	0.000508763	0.0219318	ELFN1	RGCs_early
2022-09-06	-1.02288	5.20899	31.0766	0.000506373	0.0219318	2022-09-06	RGCs_early
PLP1	-2.04284	7.05897	30.9526	0.000513068	0.0219722	PLP1	RGCs_early
RMRP	5.05758	1.68462	30.8098	0.00052092	0.0221724	RMRP	RGCs_early
MSN	-1.04841	6.13993	30.7021	0.000526939	0.0223605	MSN	RGCs_early
HOXA2	-3.39905	2.62828	30.508	0.000538007	0.022761	HOXA2	RGCs_early
POU3F1	-3.43732	3.32715	30.3143	0.000549351	0.0229027	POU3F1	RGCs_early
PHACTR3	1.25834	4.518	30.3935	0.000544675	0.0229027	PHACTR3	RGCs_early
ASPHD2	-2.00382	4.08421	30.3237	0.000548793	0.0229027	ASPHD2	RGCs_early
SAMD5	2.94042	2.85065	30.2496	0.000553203	0.0229859	SAMD5	RGCs_early
CHDH	3.542	2.58872	30.1794	0.000557421	0.0230924	CHDH	RGCs_early
NPR3	3.65441	2.42551	30.0972	0.000562415	0.0232026	NPR3	RGCs_early
GJA1	1.45009	4.8591	29.9893	0.000569051	0.0232296	GJA1	RGCs_early
RHOB	-1.53916	6.16012	29.8183	0.000579773	0.0235297	RHOB	RGCs_early
SFXN5	1.22289	5.13006	29.8386	0.000578488	0.0235297	SFXN5	RGCs_early
NTM	1.85242	5.35419	29.7826	0.000582045	0.0235534	NTM	RGCs_early
NCSTN	-1.15897	5.07202	29.673	0.000589085	0.0237694	NCSTN	RGCs_early
MAB21L1	-2.38488	3.13336	29.4118	0.000606294	0.0240002	MAB21L1	RGCs_early
STON2	1.56146	4.38411	29.4954	0.000600717	0.0240002	STON2	RGCs_early
RRBP1	1.15534	5.31425	29.4771	0.00060193	0.0240002	RRBP1	RGCs_early
MT-ND4L	1.04432	8.15891	29.3679	0.000609245	0.0240273	MT-ND4L	RGCs_early
ABHD6	1.44435	4.73347	28.6631	0.000659222	0.0253382	ABHD6	RGCs_early
GDPD1	-1.69699	4.08981	28.6441	0.000660634	0.0253382	GDPD1	RGCs_early
ATP6V1G2	-1.00461	5.21287	28.5739	0.000665902	0.0254007	ATP6V1G2	RGCs_early
CNTN1	2.13778	3.54885	28.5745	0.00066586	0.0254007	CNTN1	RGCs_early
LPIN2	1.04224	6.11065	28.4835	0.000672766	0.0254694	LPIN2	RGCs_early
AL133453.1	1.27943	4.26013	28.4469	0.000675567	0.0254908	AL133453.1	RGCs_early
PDE1B	-4.32961	3.26148	28.4101	0.000678397	0.0254944	PDE1B	RGCs_early
GADD45A	-1.39307	5.06344	28.3598	0.000682294	0.0255376	GADD45A	RGCs_early
PHLDB2	-3.45126	2.71307	28.2485	0.00069102	0.0256329	PHLDB2	RGCs_early
PCDHGB6	1.29763	5.24053	28.276	0.000688849	0.0256329	PCDHGB6	RGCs_early
AL451165.2	1.30604	4.41244	28.2682	0.000689466	0.0256329	AL451165.2	RGCs_early
FARP1	1.13636	6.38877	28.2337	0.000692187	0.0256329	FARP1	RGCs_early
SLC1A3	1.33744	7.77384	28.1631	0.0006978	0.0257044	SLC1A3	RGCs_early
PTPRZ1	1.36002	9.11274	28.1805	0.000696418	0.0257044	PTPRZ1	RGCs_early
C21orf58	1.42291	4.3448	28.1401	0.000699646	0.0257046	C21orf58	RGCs_early
KCTD16	1.63742	3.66148	27.9883	0.000711955	0.0260795	KCTD16	RGCs_early
KIAA1958	-1.00421	5.16779	27.9457	0.000715455	0.0260795	KIAA1958	RGCs_early
RBMS1	-1.37363	4.18888	27.8261	0.000725407	0.0261818	RBMS1	RGCs_early
PDGFRB	2.39437	5.17253	27.7996	0.000727638	0.0261818	PDGFRB	RGCs_early
AL590617.2	1.55678	4.05374	27.853	0.000723151	0.0261818	AL590617.2	RGCs_early
HIBADH	-1.5505	4.33522	27.8214	0.000725802	0.0261818	HIBADH	RGCs_early
SH3BP4	-1.0778	5.6055	27.7152	0.000734792	0.0262509	SH3BP4	RGCs_early
KBTBD4	-1.3445	4.17419	27.5679	0.000747484	0.0265908	KBTBD4	RGCs_early
PRSS23	-1.40376	4.38981	27.5559	0.000748528	0.0265908	PRSS23	RGCs_early
ZSWIM6	-1.16108	5.20483	27.5123	0.000752348	0.0266587	ZSWIM6	RGCs_early
AL139246.5	-3.20562	5.68444	27.4104	0.000761364	0.0268826	AL139246.5	RGCs_early
LEMD1	1.58953	4.17944	27.3839	0.000763731	0.0268826	LEMD1	RGCs_early
TRIB3	1.70088	4.30018	27.3388	0.000767777	0.026932	TRIB3	RGCs_early
BMI1	-1.29895	4.24614	27.2646	0.000774501	0.027032	BMI1	RGCs_early
LRRIQ3	-2.4605	3.06149	26.9085	0.000807796	0.0279842	LRRIQ3	RGCs_early
EVA1C	3.98885	1.93888	26.82	0.000816351	0.0281409	EVA1C	RGCs_early
GRIA2	1.9421	4.94683	26.7382	0.000824348	0.0281425	GRIA2	RGCs_early
LARP6	1.04057	5.05682	26.7797	0.000820276	0.0281425	LARP6	RGCs_early
NAV1	1.39576	5.31473	26.5501	0.000843133	0.0285337	NAV1	RGCs_early
LRRC10B	3.16125	5.25452	26.5757	0.000840548	0.0285337	LRRC10B	RGCs_early
DBP	1.09456	5.34871	26.5406	0.000844096	0.0285337	DBP	RGCs_early
LRRC3B	3.06629	5.2256	26.4083	0.000857643	0.0288519	LRRC3B	RGCs_early
FUT8	-1.18314	5.63703	26.2968	0.000869277	0.0291502	FUT8	RGCs_early
TYRO3	-1.44252	4.58094	26.216	0.000877822	0.0293188	TYRO3	RGCs_early
IFIT1	1.26734	4.9831	26.1676	0.000882999	0.0293513	IFIT1	RGCs_early
MTHFD2	1.243	4.65657	26.0932	0.000891018	0.0294244	MTHFD2	RGCs_early
GPM6A	1.0156	8.78934	26.0142	0.000899645	0.0295528	GPM6A	RGCs_early
IKZF1	-2.96598	2.64175	26.0222	0.000898762	0.0295528	IKZF1	RGCs_early
ITGA2	3.23671	3.8011	25.9815	0.000903243	0.0295613	ITGA2	RGCs_early
KCNG1	1.22542	6.26756	25.9734	0.000904138	0.0295613	KCNG1	RGCs_early
KLF6	-1.44422	7.32191	25.7499	0.000929258	0.0301074	KLF6	RGCs_early
H2AFY2	-1.0911	6.07485	25.7481	0.000929468	0.0301074	H2AFY2	RGCs_early
GRM3	1.44436	4.09133	25.6696	0.000938495	0.0303295	GRM3	RGCs_early
AC108134.2	1.11958	4.99994	25.5633	0.000950897	0.0304483	AC108134.2	RGCs_early
CALB2	2.60209	3.08755	25.5418	0.000953433	0.0304597	CALB2	RGCs_early
GYPC	-1.36546	5.40987	25.5069	0.000957565	0.0304976	GYPC	RGCs_early
ANKRD6	-1.24784	4.3429	25.4949	0.000958989	0.0304976	ANKRD6	RGCs_early
AC004540.2	-1.2371	5.05513	25.4654	0.000962505	0.0305398	AC004540.2	RGCs_early
PRELP	3.3054	3.15213	25.3717	0.000973784	0.0306309	PRELP	RGCs_early
MROH8	2.17834	4.46114	25.3866	0.00097198	0.0306309	MROH8	RGCs_early
LIMK1	-1.26338	4.35072	25.3262	0.000979325	0.0307244	LIMK1	RGCs_early
ANTXR1	-1.18008	4.8306	25.1194	0.00100498	0.0313882	ANTXR1	RGCs_early
RRAGC	1.02203	5.54478	25.0833	0.00100954	0.0314448	RRAGC	RGCs_early
THRB	-3.23538	2.52249	25.0512	0.00101362	0.0314448	THRB	RGCs_early
LINC01473	-1.37332	4.3442	24.9225	0.00103018	0.0317221	LINC01473	RGCs_early
PLOD2	1.01949	6.14643	24.865	0.0010377	0.0318402	PLOD2	RGCs_early
ST6GAL2	-1.37667	4.62309	24.7028	0.00105926	0.0323595	ST6GAL2	RGCs_early
SOX13	-1.84388	3.36362	24.5547	0.00107944	0.0324089	SOX13	RGCs_early
ARPP21	2.42535	2.7277	24.5891	0.00107471	0.0324089	ARPP21	RGCs_early
NLGN1	1.23634	5.16719	24.6067	0.0010723	0.0324089	NLGN1	RGCs_early
HIST1H4C	1.02486	8.59743	24.6065	0.00107232	0.0324089	HIST1H4C	RGCs_early
DMRT1	3.52609	2.15507	24.5684	0.00107755	0.0324089	DMRT1	RGCs_early
GPR22	3.2583	2.57176	24.4808	0.00108968	0.0325762	GPR22	RGCs_early
TMEM163	1.26322	4.32929	24.4485	0.00109421	0.032626	TMEM163	RGCs_early
PLK2	-1.35982	4.07596	24.4024	0.0011007	0.032626	PLK2	RGCs_early
TXNDC16	1.38639	3.90568	24.4342	0.00109621	0.032626	TXNDC16	RGCs_early
TFAP2A	-3.74742	4.0047	24.3627	0.00110632	0.0327232	TFAP2A	RGCs_early
MYADM	-1.79053	4.48527	24.2869	0.00111715	0.0328975	MYADM	RGCs_early
PCP4	1.70222	4.06829	24.2807	0.00111806	0.0328975	PCP4	RGCs_early
RAI14	-1.31843	4.63755	24.2095	0.00112837	0.0330256	RAI14	RGCs_early
FBLN5	-1.10149	5.07085	24.1734	0.00113364	0.0330412	FBLN5	RGCs_early
FOLR1	6.79859	1.42704	27.5234	0.00114657	0.0333485	FOLR1	RGCs_early
FIBIN	-2.63174	4.00746	24.0428	0.00115298	0.0334653	FIBIN	RGCs_early
RAB12	2.08788	3.03317	23.9985	0.00115965	0.0335304	RAB12	RGCs_early
MIAT	-1.0961	7.34273	23.8922	0.0011758	0.0339161	MIAT	RGCs_early
ARG2	1.3435	4.18332	23.8549	0.00118155	0.0339417	ARG2	RGCs_early
PDGFA	2.51706	2.64575	23.7936	0.00119105	0.033948	PDGFA	RGCs_early
UNCX	-5.28958	3.06278	23.7287	0.00120123	0.033948	UNCX	RGCs_early
TMTC2	-1.34003	5.14855	23.7346	0.0012003	0.033948	TMTC2	RGCs_early
DLGAP1-AS1	1.41536	3.84983	23.6472	0.00121416	0.0341256	DLGAP1-AS1	RGCs_early
RAP1GAP	2.71654	3.26286	23.5405	0.00123134	0.0344444	RAP1GAP	RGCs_early
VAMP5	-3.59644	3.11906	23.5267	0.00123359	0.0344444	VAMP5	RGCs_early
LINC01550	3.20491	2.27873	23.4916	0.00123932	0.0345352	LINC01550	RGCs_early
GPX3	3.43617	2.25425	23.4485	0.0012464	0.0345602	GPX3	RGCs_early
BST2	3.02554	2.30706	23.441	0.00124764	0.0345602	BST2	RGCs_early
RBM47	3.01493	2.53199	23.3206	0.00126773	0.0349088	RBM47	RGCs_early
AGT	4.18286	2.28037	23.2892	0.00127303	0.0349859	AGT	RGCs_early
GNG3	-1.20302	5.5219	23.2742	0.00127559	0.0349872	GNG3	RGCs_early
RNF112	2.60311	2.40497	23.1863	0.00129063	0.0352612	RNF112	RGCs_early
L1CAM	-1.38712	4.19987	22.9743	0.00132782	0.035787	L1CAM	RGCs_early
SLAIN1	-1.02116	5.95995	22.9795	0.00132689	0.035787	SLAIN1	RGCs_early
MOXD1	-1.06824	5.35108	22.948	0.00133251	0.0358444	MOXD1	RGCs_early
G3BP1	-1.04127	6.8292	22.7712	0.0013647	0.0362216	G3BP1	RGCs_early
SLC7A11	1.4957	3.82448	22.6026	0.0013963	0.03699	SLC7A11	RGCs_early
HIST1H2BG	1.52914	3.52469	22.5076	0.00141452	0.0374018	HIST1H2BG	RGCs_early
PRDM13	-3.52815	2.3227	22.4269	0.00143021	0.0377452	PRDM13	RGCs_early
TOX	-1.1293	4.72906	22.3005	0.00145526	0.0381179	TOX	RGCs_early
BRCA2	1.78386	3.54833	22.2785	0.00145968	0.038162	BRCA2	RGCs_early
GAD1	-2.50549	2.77746	22.1535	0.00148506	0.0386089	GAD1	RGCs_early
LPAR1	3.46162	2.80522	22.135	0.00148888	0.0386361	LPAR1	RGCs_early
HMCES	-1.15419	4.25082	22.1041	0.00149526	0.0387297	HMCES	RGCs_early
TMOD2	1.4864	4.59166	22.0505	0.0015064	0.0389461	TMOD2	RGCs_early
OTUD6B	1.16485	4.3882	21.9131	0.00153548	0.0393338	OTUD6B	RGCs_early
NRARP	-1.8361	4.35894	21.9222	0.00153354	0.0393338	NRARP	RGCs_early
TANC1	1.32934	3.97192	21.894	0.00153957	0.0393663	TANC1	RGCs_early
SNORC	2.16798	2.7727	21.8631	0.00154622	0.039464	SNORC	RGCs_early
CCSAP	1.23233	4.59873	21.5693	0.00161134	0.0403154	CCSAP	RGCs_early
VSNL1	2.97128	2.99317	21.6106	0.00160199	0.0403154	VSNL1	RGCs_early
ATP2B2	1.88243	3.44855	21.5652	0.00161229	0.0403154	ATP2B2	RGCs_early
AC109466.1	-2.29246	2.96003	21.5252	0.00162142	0.0403154	AC109466.1	RGCs_early
DUSP1	-1.0859	5.23725	21.5902	0.00160661	0.0403154	DUSP1	RGCs_early
FAM110B	1.26329	4.33196	21.5293	0.00162047	0.0403154	FAM110B	RGCs_early
HAS2-AS1	2.34827	2.52701	21.5534	0.00161496	0.0403154	HAS2-AS1	RGCs_early
SNHG19	1.16323	5.29187	21.5068	0.00162565	0.0403154	SNHG19	RGCs_early
TFAP2C	3.47263	2.28724	21.6267	0.00159836	0.0403154	TFAP2C	RGCs_early
KCNJ4	2.48993	2.68614	21.5062	0.00162578	0.0403154	KCNJ4	RGCs_early
FAM107A	2.63873	6.68959	21.4816	0.00163144	0.0403667	FAM107A	RGCs_early
LRRN3	-1.71676	6.19933	21.4721	0.00163364	0.0403667	LRRN3	RGCs_early
CMIP	-1.00074	5.661	21.365	0.00165865	0.0407334	CMIP	RGCs_early
RASSF7	1.15396	4.41151	21.3419	0.00166411	0.040759	RASSF7	RGCs_early
CPNE5	2.52792	2.77644	21.3245	0.00166825	0.0407888	CPNE5	RGCs_early
KDM3B	-1.24667	5.11063	21.2512	0.00168576	0.0411449	KDM3B	RGCs_early
APLP1	-1.13898	7.06824	21.2338	0.00168996	0.0411754	APLP1	RGCs_early
LINC02256	2.66024	2.93504	21.2187	0.00169361	0.0411925	LINC02256	RGCs_early
FGFBP3	-1.07674	7.85319	21.1629	0.00170717	0.0414502	FGFBP3	RGCs_early
RFX4	-1.13803	7.48517	21.1289	0.00171551	0.0415082	RFX4	RGCs_early
ARHGAP31	2.42683	2.55122	21.0737	0.00172915	0.0416091	ARHGAP31	RGCs_early
CTGF	-2.78262	6.15563	21.0977	0.0017232	0.0416091	CTGF	RGCs_early
KIFC2	1.79867	3.34639	21.0639	0.0017316	0.0416091	KIFC2	RGCs_early
NR2C2AP	1.49841	3.75061	20.8997	0.00177305	0.0423862	NR2C2AP	RGCs_early
HSD17B11	-1.08785	4.60125	20.8404	0.00178833	0.0423929	HSD17B11	RGCs_early
CA4	4.79839	2.35908	20.8186	0.001794	0.0423929	CA4	RGCs_early
ZNF506	-6.77912	1.83388	23.5391	0.00179099	0.0423929	ZNF506	RGCs_early
SLC17A7	3.68191	2.81255	20.8815	0.00177774	0.0423929	SLC17A7	RGCs_early
ENPP2	-1.80634	6.0087	20.7123	0.00182189	0.0429653	ENPP2	RGCs_early
PEAK1	1.14075	4.16334	20.6213	0.00184622	0.0433925	PEAK1	RGCs_early
INSM1	-1.24109	4.06125	20.451	0.00189285	0.0441908	INSM1	RGCs_early
ADAMTS3	3.11133	4.29392	20.4359	0.00189708	0.0442155	ADAMTS3	RGCs_early
GABRA5	4.53633	1.28995	20.4094	0.00190447	0.0443138	GABRA5	RGCs_early
CTSC	-1.25284	4.48584	20.302	0.00193487	0.0447231	CTSC	RGCs_early
ZFP36	-3.65085	3.52182	20.3071	0.00193342	0.0447231	ZFP36	RGCs_early
NQO1	1.54399	4.62837	20.2026	0.00196356	0.0449834	NQO1	RGCs_early
EFR3B	1.37119	5.01842	19.9904	0.00202658	0.0457816	EFR3B	RGCs_early
CFAP20	-1.08185	6.29919	19.9406	0.00204173	0.0460494	CFAP20	RGCs_early
AFF3	1.00972	5.15765	19.8923	0.00205654	0.0462046	AFF3	RGCs_early
RGS9	1.45519	3.50223	19.8645	0.00206516	0.0462046	RGS9	RGCs_early
HES4	-1.12675	10.2123	19.7827	0.00209071	0.0465076	HES4	RGCs_early
FOXJ1	-1.53045	3.88815	19.7785	0.00209203	0.0465076	FOXJ1	RGCs_early
EPB41	-1.28874	4.5878	19.664	0.0021285	0.0470189	EPB41	RGCs_early
RBBP8	-1.24338	4.0755	19.6806	0.00212317	0.0470189	RBBP8	RGCs_early
FUT11	1.00386	5.51636	19.5924	0.00215172	0.0473081	FUT11	RGCs_early
LARGE1	-1.37319	3.70305	19.598	0.0021499	0.0473081	LARGE1	RGCs_early
NRXN1	1.4598	6.8441	19.49	0.00218548	0.0475082	NRXN1	RGCs_early
PGM5-AS1	-3.48637	2.31083	19.4968	0.0021832	0.0475082	PGM5-AS1	RGCs_early
GALNT12	2.50385	2.26027	19.4879	0.00218618	0.0475082	GALNT12	RGCs_early
EBF3	-3.53578	2.72902	19.4822	0.00218808	0.0475082	EBF3	RGCs_early
ZNF384	-1.32421	3.82001	19.5292	0.00217249	0.0475082	ZNF384	RGCs_early
PHLDA3	-2.50198	3.13924	19.3907	0.00221886	0.0478404	PHLDA3	RGCs_early
PIR	1.02977	4.52348	19.3858	0.00222051	0.0478404	PIR	RGCs_early
CRNDE	-1.38118	7.69398	19.3952	0.00221731	0.0478404	CRNDE	RGCs_early
MIR193BHG	3.46271	1.84086	19.3303	0.00223945	0.0479524	MIR193BHG	RGCs_early
HSD17B14	1.44325	4.82046	19.3125	0.00224556	0.0480096	HSD17B14	RGCs_early
AMOTL1	1.14409	4.04993	19.2996	0.00225002	0.0480314	AMOTL1	RGCs_early
PLXNA2	-1.26967	5.37236	19.2882	0.00225394	0.0480417	PLXNA2	RGCs_early
ROR1	-2.67686	4.5177	19.1305	0.00230936	0.0487904	ROR1	RGCs_early
RAB11FIP1	-1.64655	3.4986	19.1285	0.00231004	0.0487904	RAB11FIP1	RGCs_early
OLIG3	-6.72428	1.92683	21.3596	0.00234664	0.0493395	OLIG3	RGCs_early
AC010980.2	-2.17053	3.0023	18.993	0.00235903	0.0493706	AC010980.2	RGCs_early
FGFR2	-1.09147	4.46577	18.9994	0.0023567	0.0493706	FGFR2	RGCs_early
RNF43	-1.59068	3.54883	19.0105	0.00235263	0.0493706	RNF43	RGCs_early
TFPI	3.49497	4.9732	18.9707	0.00236722	0.0494002	TFPI	RGCs_early
CUX2	-1.71533	3.6211	18.9035	0.00239209	0.0498447	CUX2	RGCs_early
NHLH1	-1.49801	4.13857	18.8427	0.0024149	0.0499251	NHLH1	RGCs_early
VEGFC	-2.96687	2.96841	18.8441	0.00241436	0.0499251	VEGFC	RGCs_early
ANKRD29	-2.68889	5.41619	18.836	0.00241741	0.0499251	ANKRD29	RGCs_early
CRYZ	-1.02538	4.39648	18.8229	0.00242236	0.0499537	CRYZ	RGCs_early

## Sheet: RGCs
	logFC	logCPM	F	p_val	p_adj	gene	cluster_id
CRYM	6.12699	3.82357	562.921	4.21702e-06	0.0196583	CRYM	RGCs
KCNG1	2.26764	6.15098	570.379	4.08865e-06	0.0196583	KCNG1	RGCs
NFIX	3.15994	6.35209	700.028	2.52645e-06	0.0196583	NFIX	RGCs
NUPR1	5.22266	3.66098	485.677	5.96302e-06	0.0208482	NUPR1	RGCs
TMEM158	-2.00192	5.26323	310.537	1.69885e-05	0.0212088	TMEM158	RGCs
EPHA6	2.85375	4.44609	270.184	2.35065e-05	0.0212088	EPHA6	RGCs
SFRP2	-4.65365	4.74749	293.448	1.93881e-05	0.0212088	SFRP2	RGCs
MEF2C	2.4144	5.35841	357.316	1.22386e-05	0.0212088	MEF2C	RGCs
EFNA5	-2.00448	4.70285	262.52	2.51368e-05	0.0212088	EFNA5	RGCs
GPR22	3.38415	3.22198	259.683	2.57812e-05	0.0212088	GPR22	RGCs
TKTL1	2.87644	5.9971	282.717	2.11484e-05	0.0212088	TKTL1	RGCs
AL136366.1	3.79522	4.04672	307.856	1.73359e-05	0.0212088	AL136366.1	RGCs
CYP26A1	-10.6952	5.1618	261.614	2.53401e-05	0.0212088	CYP26A1	RGCs
NDUFA4L2	3.2061	6.94171	353.546	1.2546e-05	0.0212088	NDUFA4L2	RGCs
SLITRK6	2.02115	4.46472	260.316	2.56355e-05	0.0212088	SLITRK6	RGCs
GFAP	5.86602	3.09151	285.93	2.05982e-05	0.0212088	GFAP	RGCs
BST2	3.48627	3.47075	299.832	1.84383e-05	0.0212088	BST2	RGCs
MSRA	2.54362	4.7735	245.509	2.93804e-05	0.0228269	MSRA	RGCs
MDFI	1.71076	5.69835	232.341	3.34003e-05	0.0245435	MDFI	RGCs
TMOD1	3.24382	2.89933	222.708	3.68548e-05	0.0245435	TMOD1	RGCs
ZNF350	-3.9846	2.25978	227.302	3.51469e-05	0.0245435	ZNF350	RGCs
PLOD1	1.61133	4.68401	161.516	7.75609e-05	0.0271117	PLOD1	RGCs
DDR2	2.86092	2.78254	163.623	7.52747e-05	0.0271117	DDR2	RGCs
SIPA1L2	-2.03185	4.16994	178.926	6.12223e-05	0.0271117	SIPA1L2	RGCs
MSTN	10.4172	3.05127	378.333	6.89647e-05	0.0271117	MSTN	RGCs
LRRN1	-1.7415	6.0794	206.548	4.38989e-05	0.0271117	LRRN1	RGCs
NPR3	3.87536	2.19719	163.845	7.50394e-05	0.0271117	NPR3	RGCs
BTF3	-1.03951	9.43947	159.239	8.01433e-05	0.0271117	BTF3	RGCs
MOXD1	-4.28241	2.47613	200.665	4.6942e-05	0.0271117	MOXD1	RGCs
EDA2R	-5.79921	0.991669	161.193	7.79197e-05	0.0271117	EDA2R	RGCs
GPC3	-3.40009	2.99759	157.199	8.25632e-05	0.0271117	GPC3	RGCs
MIR124-2HG	-1.9218	4.98466	168.558	7.0282e-05	0.0271117	MIR124-2HG	RGCs
CA9	3.87398	4.39293	184.52	5.70125e-05	0.0271117	CA9	RGCs
SOX6	1.64735	4.6563	167.073	7.17329e-05	0.0271117	SOX6	RGCs
IRAK4	-6.06963	1.27752	157.774	8.18714e-05	0.0271117	IRAK4	RGCs
MAB21L1	-3.37794	3.71592	156.545	8.3361e-05	0.0271117	MAB21L1	RGCs
THSD4	-2.54377	2.8923	173.679	6.55843e-05	0.0271117	THSD4	RGCs
GPRC5B	-1.78836	4.19134	182.759	5.82922e-05	0.0271117	GPRC5B	RGCs
HOXB2	-6.11341	1.78069	192.258	5.18382e-05	0.0271117	HOXB2	RGCs
ALYREF	-1.28982	6.11153	159.547	7.97871e-05	0.0271117	ALYREF	RGCs
SAMD1	1.58891	6.53367	191.297	5.24435e-05	0.0271117	SAMD1	RGCs
ZFP28	-5.66639	1.75203	190.071	5.32306e-05	0.0271117	ZFP28	RGCs
MT-ATP6	-1.13306	12.5434	161.956	7.70749e-05	0.0271117	MT-ATP6	RGCs
ST8SIA1	-1.50125	5.18602	147.962	9.49288e-05	0.0288604	ST8SIA1	RGCs
NFIC	2.10928	6.32797	147.978	9.4905e-05	0.0288604	NFIC	RGCs
HNRNPH1	-1.0445	7.75932	144.587	0.000100108	0.0297875	HNRNPH1	RGCs
ADAMTS3	3.63583	2.6358	142.621	0.000103312	0.0301005	ADAMTS3	RGCs
NEFL	-1.52877	4.60641	134.443	0.000118333	0.0324488	NEFL	RGCs
MAGEL2	-2.6324	3.0836	132.984	0.000121335	0.0326321	MAGEL2	RGCs
SYTL2	-2.74141	2.19633	129.117	0.000129838	0.0340166	SYTL2	RGCs
EIF2S2	1.09651	8.11324	128.468	0.000131347	0.0340166	EIF2S2	RGCs
RAB3GAP2	1.03668	6.03438	124.64	0.00014078	0.0351572	RAB3GAP2	RGCs
PACSIN3	2.1504	3.11661	125.571	0.000138398	0.0351572	PACSIN3	RGCs
CMTM7	-4.2423	1.52881	121.571	0.000149055	0.0362144	CMTM7	RGCs
GRIK2	2.49316	3.96723	121.168	0.000150192	0.0362144	GRIK2	RGCs
PHLDA3	-2.11351	3.08426	119.305	0.000155613	0.0368857	PHLDA3	RGCs
DMRTA1	-3.02874	2.40337	117.274	0.00016185	0.0371061	DMRTA1	RGCs
MN1	-1.55633	4.44723	117.336	0.000161654	0.0371061	MN1	RGCs
CRABP2	-2.42766	5.38212	114.757	0.000170081	0.0374928	CRABP2	RGCs
PTX3	-1.63287	3.69529	114.317	0.000171579	0.0374928	PTX3	RGCs
STC2	1.25507	5.44679	114.71	0.00017024	0.0374928	STC2	RGCs
GPX3	3.02082	2.54262	111.891	0.000180197	0.0387701	GPX3	RGCs
VAV3	-2.89871	1.82802	110.698	0.00018466	0.0390162	VAV3	RGCs
BCAN	2.16437	4.70302	110.11	0.000186921	0.0390162	BCAN	RGCs
NDRG2	1.82902	4.8568	109.22	0.000190411	0.0391603	NDRG2	RGCs
C2orf49	1.29553	5.66336	100.924	0.000227961	0.0393584	C2orf49	RGCs
GRB14	2.33714	2.52601	106.976	0.000199647	0.0393584	GRB14	RGCs
CMTM8	-1.89556	3.69239	103.614	0.000214714	0.0393584	CMTM8	RGCs
CDKN1A	-4.15826	2.27897	102.272	0.000221183	0.0393584	CDKN1A	RGCs
PTGR1	-1.95067	5.39784	103.318	0.000216115	0.0393584	PTGR1	RGCs
CARS	1.0121	5.46577	107.249	0.000198487	0.0393584	CARS	RGCs
PDZRN4	1.96495	2.88054	102.615	0.000219504	0.0393584	PDZRN4	RGCs
PUS7L	-12.1331	4.56053	203.188	0.000217081	0.0393584	PUS7L	RGCs
ZFHX3	-1.3251	5.15821	102.395	0.000220578	0.0393584	ZFHX3	RGCs
ALDOC	1.14587	6.05697	103.806	0.000213809	0.0393584	ALDOC	RGCs
TRIB3	1.39417	3.92255	101.881	0.000223121	0.0393584	TRIB3	RGCs
ZNF738	-1.05957	5.97974	104.024	0.000212789	0.0393584	ZNF738	RGCs
EGLN3	1.02836	6.12664	100.377	0.000230797	0.0393621	EGLN3	RGCs
S100A11	-3.55063	1.40812	97.1676	0.000248492	0.0400077	S100A11	RGCs
DNER	-1.14448	6.57118	97.2109	0.000248241	0.0400077	DNER	RGCs
LRRC10B	3.369	5.39854	96.7828	0.000250742	0.0400077	LRRC10B	RGCs
DIO2	3.4427	2.41764	95.4737	0.000258617	0.0401862	DIO2	RGCs
INA	-1.02856	5.34656	94.0215	0.000267771	0.0406382	INA	RGCs
MSI1	-1.3639	5.92579	93.6413	0.000270244	0.0406382	MSI1	RGCs
SCG5	-1.49939	5.1705	93.643	0.000270233	0.0406382	SCG5	RGCs
GABRB1	5.35829	3.98686	92.841	0.000275556	0.0409963	GABRB1	RGCs
COL5A1	1.65866	3.67238	90.726	0.00029033	0.0424412	COL5A1	RGCs
TDP1	1.41153	4.87449	88.891	0.000304079	0.0424412	TDP1	RGCs
JOSD2	1.37868	4.24109	89.6497	0.000298285	0.0424412	JOSD2	RGCs
ZMAT3	-1.5518	4.35134	87.4297	0.0003157	0.0425967	ZMAT3	RGCs
FAM221A	-1.45401	3.90904	87.2988	0.000316772	0.0425967	FAM221A	RGCs
ADM2	2.27392	2.29367	87.4594	0.000315458	0.0425967	ADM2	RGCs
RASSF7	1.06088	4.53113	85.9749	0.000327908	0.0432622	RASSF7	RGCs
FSTL5	-2.14497	3.53808	85.5796	0.000331341	0.0433065	FSTL5	RGCs
VSNL1	3.60579	3.85049	84.6585	0.000339541	0.043564	VSNL1	RGCs
ATF5	1.95056	6.83329	83.4151	0.000351075	0.0446344	ATF5	RGCs
LSAMP	-1.26272	5.46064	82.5463	0.000359469	0.0452899	LSAMP	RGCs
RAB31	-2.3055	2.40849	82.0401	0.000364491	0.0455126	RAB31	RGCs
AP2B1	1.04617	7.18298	80.9782	0.000375357	0.0462646	AP2B1	RGCs
NELL1	3.09613	2.28883	80.061	0.000385116	0.0465615	NELL1	RGCs
C19orf66	1.64413	3.00672	79.9603	0.000386209	0.0465615	C19orf66	RGCs
MTHFD2	1.19256	5.57446	77.9069	0.000409505	0.0469065	MTHFD2	RGCs
CD24	-1.7951	7.60735	79.3122	0.000393354	0.0469065	CD24	RGCs
CXorf57	-4.05087	0.952648	77.8789	0.000409836	0.0469065	CXorf57	RGCs
AL078639.1	1.83724	5.15573	78.9233	0.000397731	0.0469065	AL078639.1	RGCs
MT3	1.74483	7.14201	78.6737	0.000400577	0.0469065	MT3	RGCs
UHRF1	-1.05925	5.4758	77.6508	0.000412549	0.0469065	UHRF1	RGCs
ECHDC2	1.27433	3.64037	62.9602	0.000659547	0.0470586	ECHDC2	RGCs
AL033530.1	3.73615	1.72944	72.4039	0.00048273	0.0470586	AL033530.1	RGCs
LIX1L-AS1	1.71449	2.58212	73.0621	0.000473035	0.0470586	LIX1L-AS1	RGCs
ARHGEF2	1.17694	4.71947	70.6853	0.00050942	0.0470586	ARHGEF2	RGCs
NHLH1	-1.00034	4.57068	68.2277	0.000551379	0.0470586	NHLH1	RGCs
HSPA6	3.05352	2.87773	74.9109	0.000447237	0.0470586	HSPA6	RGCs
CNTN2	-2.09348	3.69041	72.1891	0.000485957	0.0470586	CNTN2	RGCs
ANTXR1	-1.13699	4.23513	63.5184	0.00064672	0.0470586	ANTXR1	RGCs
FAM107A	2.28852	4.99002	71.9324	0.000489852	0.0470586	FAM107A	RGCs
AC110491.1	2.29365	2.60924	64.5546	0.000623834	0.0470586	AC110491.1	RGCs
MGLL	2.79922	2.68837	74.7917	0.000448841	0.0470586	MGLL	RGCs
IGSF10	1.55271	4.66196	74.6082	0.000451322	0.0470586	IGSF10	RGCs
NLGN1	1.20149	6.21008	64.8406	0.000617722	0.0470586	NLGN1	RGCs
ADRA2C	3.47312	1.25669	71.8284	0.000491443	0.0470586	ADRA2C	RGCs
PPP2R2B	1.32511	6.45523	72.3209	0.000483974	0.0470586	PPP2R2B	RGCs
EBF1	-4.86824	3.21852	76.5402	0.000426132	0.0470586	EBF1	RGCs
FKBP5	-1.54001	3.04158	75.0285	0.000445665	0.0470586	FKBP5	RGCs
CDK6	-1.80777	4.63883	62.7937	0.000663442	0.0470586	CDK6	RGCs
AL445472.1	1.12462	4.49487	65.5169	0.000603599	0.0470586	AL445472.1	RGCs
FGF13	-1.04061	4.64638	66.9356	0.000575432	0.0470586	FGF13	RGCs
CDR1	2.85483	3.0955	72.4115	0.000482617	0.0470586	CDR1	RGCs
LPL	2.58121	3.88829	63.6284	0.000644234	0.0470586	LPL	RGCs
EBF2	-4.45602	2.46908	72.2741	0.000484676	0.0470586	EBF2	RGCs
NECAB1	1.84774	2.56459	68.4031	0.000548225	0.0470586	NECAB1	RGCs
KLF10	-1.07152	4.52472	70.0363	0.000520048	0.0470586	KLF10	RGCs
GAS1	-1.59361	7.09893	74.6847	0.000450285	0.0470586	GAS1	RGCs
PBX3	-2.5031	5.95608	71.2984	0.000499663	0.0470586	PBX3	RGCs
CDKN1C	-2.33984	4.544	63.2529	0.000652776	0.0470586	CDKN1C	RGCs
CRYAB	2.27631	3.12425	63.9476	0.000637098	0.0470586	CRYAB	RGCs
SNCG	-2.20018	3.58325	67.8943	0.000557447	0.0470586	SNCG	RGCs
PPP1R3C	1.13953	4.79073	74.1251	0.000457951	0.0470586	PPP1R3C	RGCs
LBX1	-5.7023	1.86673	66.3858	0.000586121	0.0470586	LBX1	RGCs
GFRA1	-3.49361	1.97782	61.1676	0.000703272	0.0470586	GFRA1	RGCs
ZNF384	-1.25345	3.88121	65.6014	0.000601867	0.0470586	ZNF384	RGCs
CUX2	-5.54032	1.14602	71.5194	0.000496211	0.0470586	CUX2	RGCs
IRF9	-2.15692	2.58192	62.6896	0.000665894	0.0470586	IRF9	RGCs
TSHR	3.47935	2.51034	73.1387	0.000471925	0.0470586	TSHR	RGCs
CHAC1	1.48075	3.36307	71.4729	0.000496935	0.0470586	CHAC1	RGCs
TLN2	1.21007	4.75074	66.9212	0.000575709	0.0470586	TLN2	RGCs
MT1X	1.32586	3.66328	70.7222	0.000508825	0.0470586	MT1X	RGCs
SERPINF1	-3.14178	0.93266	67.8227	0.000558762	0.0470586	SERPINF1	RGCs
PCYT2	1.10215	4.54466	63.5742	0.000645457	0.0470586	PCYT2	RGCs
RAB12	1.71076	2.81924	74.2564	0.000456136	0.0470586	RAB12	RGCs
ZNF521	-1.27329	5.06446	62.1983	0.000677645	0.0470586	ZNF521	RGCs
MBD2	1.02982	4.51836	64.4943	0.000625134	0.0470586	MBD2	RGCs
WFDC2	-2.00811	3.82006	64.2572	0.000630284	0.0470586	WFDC2	RGCs
WTIP	-1.2576	3.78399	65.8845	0.000596115	0.0470586	WTIP	RGCs
NPTXR	1.8587	3.73993	74.9884	0.000446201	0.0470586	NPTXR	RGCs
PRR34-AS1	1.68438	4.02574	68.0348	0.000554878	0.0470586	PRR34-AS1	RGCs
PCP4L1	-2.08222	1.67266	60.1792	0.000729165	0.0476227	PCP4L1	RGCs
THRA	1.05291	6.14203	60.0163	0.00073356	0.0476227	THRA	RGCs
SLC26A4-AS1	4.88012	1.30513	59.7789	0.000740036	0.0476422	SLC26A4-AS1	RGCs
CAPS2	-6.00789	0.427157	59.6839	0.000742652	0.0476422	CAPS2	RGCs
KCNQ1OT1	-1.32651	7.38288	59.0248	0.000761156	0.0479877	KCNQ1OT1	RGCs
AEN	-1.89242	2.58194	59.0035	0.000761764	0.0479877	AEN	RGCs
FNDC5	-1.69175	2.78353	54.3596	0.000913035	0.0480026	FNDC5	RGCs
SEMA4A	1.66779	2.85277	56.6631	0.000833132	0.0480026	SEMA4A	RGCs
ITM2C	-1.23122	5.79118	55.9937	0.000855293	0.0480026	ITM2C	RGCs
ACKR3	-2.05928	4.18214	54.5056	0.000907654	0.0480026	ACKR3	RGCs
GABRA4	3.5797	1.55848	57.5001	0.000806557	0.0480026	GABRA4	RGCs
HOMER1	-1.27197	3.43425	58.3014	0.00078223	0.0480026	HOMER1	RGCs
P4HA2	1.11068	4.29529	58.5526	0.000774817	0.0480026	P4HA2	RGCs
RCAN2	-2.7191	1.22792	54.881	0.000894024	0.0480026	RCAN2	RGCs
HIBADH	-1.82436	3.64632	55.8259	0.000860976	0.0480026	HIBADH	RGCs
CNTNAP3	-2.02561	2.31831	54.3179	0.000914582	0.0480026	CNTNAP3	RGCs
GRM5-AS1	2.37126	1.60859	56.4949	0.000838622	0.0480026	GRM5-AS1	RGCs
NAALAD2	-3.98652	0.677939	54.3218	0.000914435	0.0480026	NAALAD2	RGCs
FGF14	-1.5934	2.74877	56.029	0.000854102	0.0480026	FGF14	RGCs
LRFN5	-2.46569	1.00202	56.3986	0.000841789	0.0480026	LRFN5	RGCs
PLCG2	2.06835	5.80316	54.8491	0.000895168	0.0480026	PLCG2	RGCs
LINC00672	-1.56584	3.91696	58.028	0.000790411	0.0480026	LINC00672	RGCs
NMT1	1.13323	5.97173	54.886	0.000893845	0.0480026	NMT1	RGCs
AC015802.6	1.00609	3.99142	57.4154	0.000809188	0.0480026	AC015802.6	RGCs
ACSS1	1.68333	3.78475	56.4602	0.00083976	0.0480026	ACSS1	RGCs
FAM182B	3.19564	1.55185	55.7875	0.000862286	0.0480026	FAM182B	RGCs
RFPL1S	1.4539	3.20762	57.2103	0.00081562	0.0480026	RFPL1S	RGCs
EBF3	-3.48936	2.86303	53.5493	0.000943743	0.0485229	EBF3	RGCs
LAMP5	-4.09711	3.59691	53.7749	0.000935049	0.0485229	LAMP5	RGCs
CD200	-1.01086	4.48789	53.3042	0.00095332	0.0488138	CD200	RGCs
ADGRL3	-2.37167	3.22311	52.8784	0.000970293	0.0489875	ADGRL3	RGCs
FZD1	-1.15626	3.54629	52.9351	0.000968007	0.0489875	FZD1	RGCs
ANKRD18A	-2.20084	2.35563	52.9066	0.000969156	0.0489875	ANKRD18A	RGCs

## Sheet: goRGCs&Astro
	logFC	logCPM	F	p_val	p_adj	gene	cluster_id
CDKN1A	-6.25499	4.22641	554.554	2.86137e-07	0.00399561	CDKN1A	gliogenic_outer_RGCs_and_astrocytes
SFRP2	-4.81515	4.03471	274.648	2.41842e-06	0.00687676	SFRP2	gliogenic_outer_RGCs_and_astrocytes
NUPR1	6.80937	5.0012	275.797	2.38809e-06	0.00687676	NUPR1	gliogenic_outer_RGCs_and_astrocytes
BST2	5.96642	4.25783	273.017	2.46232e-06	0.00687676	BST2	gliogenic_outer_RGCs_and_astrocytes
ATF5	2.07753	8.46186	339.68	1.27109e-06	0.00687676	ATF5	gliogenic_outer_RGCs_and_astrocytes
CRABP2	-2.28969	5.95385	218.502	4.81806e-06	0.0112132	CRABP2	gliogenic_outer_RGCs_and_astrocytes
DDR2	3.94348	3.62485	123.086	2.66647e-05	0.0118936	DDR2	gliogenic_outer_RGCs_and_astrocytes
ITM2C	-1.58738	6.18916	148.035	1.54349e-05	0.0118936	ITM2C	gliogenic_outer_RGCs_and_astrocytes
EXOG	1.86583	6.2552	188.205	7.54027e-06	0.0118936	EXOG	gliogenic_outer_RGCs_and_astrocytes
TMEM158	-1.98643	4.75907	118.854	2.95627e-05	0.0118936	TMEM158	gliogenic_outer_RGCs_and_astrocytes
TMEM45A	-2.02542	5.03926	110.398	3.67331e-05	0.0118936	TMEM45A	gliogenic_outer_RGCs_and_astrocytes
GABRB1	6.23515	3.68151	113.786	3.36104e-05	0.0118936	GABRB1	gliogenic_outer_RGCs_and_astrocytes
HMGB2	-1.27057	8.12897	143.553	1.6911e-05	0.0118936	HMGB2	gliogenic_outer_RGCs_and_astrocytes
ARRDC3	-1.31157	7.39773	114.613	3.29013e-05	0.0118936	ARRDC3	gliogenic_outer_RGCs_and_astrocytes
CXXC5	-1.59561	6.14583	112.212	3.50155e-05	0.0118936	CXXC5	gliogenic_outer_RGCs_and_astrocytes
GPX3	3.1169	3.91158	114.887	3.26713e-05	0.0118936	GPX3	gliogenic_outer_RGCs_and_astrocytes
EBF1	-6.13308	2.62733	138.016	1.90044e-05	0.0118936	EBF1	gliogenic_outer_RGCs_and_astrocytes
CCNG1	-1.31192	6.55238	124.108	2.60216e-05	0.0118936	CCNG1	gliogenic_outer_RGCs_and_astrocytes
PTP4A1	-1.42372	7.32739	121.944	2.74086e-05	0.0118936	PTP4A1	gliogenic_outer_RGCs_and_astrocytes
CD24	-1.97171	7.25255	126.945	2.43412e-05	0.0118936	CD24	gliogenic_outer_RGCs_and_astrocytes
MOXD1	-4.91351	2.9387	122.825	2.68322e-05	0.0118936	MOXD1	gliogenic_outer_RGCs_and_astrocytes
AL078639.1	1.88152	5.40525	115.003	3.25742e-05	0.0118936	AL078639.1	gliogenic_outer_RGCs_and_astrocytes
TKTL1	3.06885	5.53197	145.999	1.60835e-05	0.0118936	TKTL1	gliogenic_outer_RGCs_and_astrocytes
MSRA	2.45611	4.7118	151.147	1.45091e-05	0.0118936	MSRA	gliogenic_outer_RGCs_and_astrocytes
AL136366.1	5.17319	3.56285	146.567	1.5899e-05	0.0118936	AL136366.1	gliogenic_outer_RGCs_and_astrocytes
AL354733.3	2.58477	4.44157	123.936	2.61286e-05	0.0118936	AL354733.3	gliogenic_outer_RGCs_and_astrocytes
CYP26A1	-8.52699	3.85345	123.881	2.61625e-05	0.0118936	CYP26A1	gliogenic_outer_RGCs_and_astrocytes
PUS7L	-10.2451	3.61048	208.03	2.28272e-05	0.0118936	PUS7L	gliogenic_outer_RGCs_and_astrocytes
MSI1	-1.51961	5.70785	120.649	2.82852e-05	0.0118936	MSI1	gliogenic_outer_RGCs_and_astrocytes
NDN	-1.15081	7.85504	109.311	3.78165e-05	0.0118936	NDN	gliogenic_outer_RGCs_and_astrocytes
GPRC5B	-1.77699	4.57491	129.203	2.3105e-05	0.0118936	GPRC5B	gliogenic_outer_RGCs_and_astrocytes
PLCG2	2.12145	5.9359	134.406	2.05572e-05	0.0118936	PLCG2	gliogenic_outer_RGCs_and_astrocytes
WSB1	-1.33458	10.1247	121.673	2.75886e-05	0.0118936	WSB1	gliogenic_outer_RGCs_and_astrocytes
LAMP5	-5.20055	2.63602	156.993	1.29594e-05	0.0118936	LAMP5	gliogenic_outer_RGCs_and_astrocytes
ID1	-2.37154	4.3558	129.518	2.29391e-05	0.0118936	ID1	gliogenic_outer_RGCs_and_astrocytes
WFDC2	-2.86162	5.15399	145.676	1.61895e-05	0.0118936	WFDC2	gliogenic_outer_RGCs_and_astrocytes
KCNG1	2.1468	6.69044	110.646	3.64913e-05	0.0118936	KCNG1	gliogenic_outer_RGCs_and_astrocytes
NFIC	2.31076	6.03807	124.39	2.58477e-05	0.0118936	NFIC	gliogenic_outer_RGCs_and_astrocytes
NFIX	3.0819	6.26836	108.811	3.83281e-05	0.0118936	NFIX	gliogenic_outer_RGCs_and_astrocytes
BBC3	-1.82569	5.4232	110.913	3.62346e-05	0.0118936	BBC3	gliogenic_outer_RGCs_and_astrocytes
ZNF350	-5.43669	2.27279	135.001	2.02901e-05	0.0118936	ZNF350	gliogenic_outer_RGCs_and_astrocytes
ZFP28	-4.93718	1.80727	109.422	3.77031e-05	0.0118936	ZFP28	gliogenic_outer_RGCs_and_astrocytes
C22orf46	2.81565	4.72629	173.895	9.55252e-06	0.0118936	C22orf46	gliogenic_outer_RGCs_and_astrocytes
CRYM	4.57145	3.53873	105.085	4.24522e-05	0.012887	CRYM	gliogenic_outer_RGCs_and_astrocytes
CMTM8	-2.32226	3.87333	98.688	5.10167e-05	0.0137634	CMTM8	gliogenic_outer_RGCs_and_astrocytes
CD200	-1.61358	4.58044	98.4128	5.14345e-05	0.0137634	CD200	gliogenic_outer_RGCs_and_astrocytes
ADGRL3	-3.37735	3.08649	97.2599	5.32351e-05	0.0137634	ADGRL3	gliogenic_outer_RGCs_and_astrocytes
ELFN1	-2.66346	2.91208	96.8855	5.38379e-05	0.0137634	ELFN1	gliogenic_outer_RGCs_and_astrocytes
EDA2R	-4.46375	1.9125	94.5315	5.78422e-05	0.0137634	EDA2R	gliogenic_outer_RGCs_and_astrocytes
NEFL	-2.14713	4.51782	98.0035	5.20644e-05	0.0137634	NEFL	gliogenic_outer_RGCs_and_astrocytes
FAM84B	2.03886	4.30244	94.4056	5.80673e-05	0.0137634	FAM84B	gliogenic_outer_RGCs_and_astrocytes
LMO1	-1.73686	4.35856	93.2846	6.01239e-05	0.0137634	LMO1	gliogenic_outer_RGCs_and_astrocytes
LIN7A	-1.69603	4.39942	101.088	4.75557e-05	0.0137634	LIN7A	gliogenic_outer_RGCs_and_astrocytes
SGCG	2.08998	4.34317	94.0751	5.86637e-05	0.0137634	SGCG	gliogenic_outer_RGCs_and_astrocytes
MAGEL2	-3.11681	3.87473	93.6311	5.94779e-05	0.0137634	MAGEL2	gliogenic_outer_RGCs_and_astrocytes
TNFSF9	-4.05364	2.2698	93.3078	6.00804e-05	0.0137634	TNFSF9	gliogenic_outer_RGCs_and_astrocytes
SLC44A2	-1.93377	5.94649	93.3575	5.99872e-05	0.0137634	SLC44A2	gliogenic_outer_RGCs_and_astrocytes
ARHGEF2	1.5076	5.36483	91.2742	6.40605e-05	0.0140518	ARHGEF2	gliogenic_outer_RGCs_and_astrocytes
HK2	-1.24646	6.58259	91.0526	6.4515e-05	0.0140518	HK2	gliogenic_outer_RGCs_and_astrocytes
PBX3	-2.45217	5.82046	91.8976	6.28041e-05	0.0140518	PBX3	gliogenic_outer_RGCs_and_astrocytes
NGFR	-3.81393	2.64292	90.623	6.54085e-05	0.0140518	NGFR	gliogenic_outer_RGCs_and_astrocytes
NDNF	-2.78575	3.14501	89.7254	6.7329e-05	0.0141984	NDNF	gliogenic_outer_RGCs_and_astrocytes
EFNA5	-1.83861	4.83402	88.909	6.91412e-05	0.0141984	EFNA5	gliogenic_outer_RGCs_and_astrocytes
SPECC1	-1.83392	4.17769	89.3605	6.81313e-05	0.0141984	SPECC1	gliogenic_outer_RGCs_and_astrocytes
RHOB	-1.18973	6.22463	87.3343	7.28233e-05	0.0143226	RHOB	gliogenic_outer_RGCs_and_astrocytes
WNT7A	-2.89011	3.12519	87.8024	7.17023e-05	0.0143226	WNT7A	gliogenic_outer_RGCs_and_astrocytes
PRTG	-3.24088	3.51238	87.4637	7.25111e-05	0.0143226	PRTG	gliogenic_outer_RGCs_and_astrocytes
BTF3	-1.35681	9.6369	85.7382	7.68253e-05	0.0146194	BTF3	gliogenic_outer_RGCs_and_astrocytes
ST8SIA1	-1.61184	4.92037	85.4903	7.7473e-05	0.0146194	ST8SIA1	gliogenic_outer_RGCs_and_astrocytes
BMP7	1.49504	5.19169	86.0742	7.59591e-05	0.0146194	BMP7	gliogenic_outer_RGCs_and_astrocytes
LARP6	1.30672	5.74487	84.6777	7.96469e-05	0.0148129	LARP6	gliogenic_outer_RGCs_and_astrocytes
KCNQ2	-1.16733	6.37969	84.3233	8.06203e-05	0.0148129	KCNQ2	gliogenic_outer_RGCs_and_astrocytes
CDKN1C	-2.15244	4.66159	82.7746	8.50639e-05	0.0151796	CDKN1C	gliogenic_outer_RGCs_and_astrocytes
PCBP2	-1.08275	8.31858	82.5028	8.58771e-05	0.0151796	PCBP2	gliogenic_outer_RGCs_and_astrocytes
SDK2	-1.59654	5.10611	82.6526	8.54278e-05	0.0151796	SDK2	gliogenic_outer_RGCs_and_astrocytes
ECHDC2	2.77008	3.63736	81.4549	8.91103e-05	0.015201	ECHDC2	gliogenic_outer_RGCs_and_astrocytes
MIR124-2HG	-1.8516	4.3508	81.8926	8.77406e-05	0.015201	MIR124-2HG	gliogenic_outer_RGCs_and_astrocytes
NDUFA4L2	2.75399	8.36158	80.5861	9.19139e-05	0.015201	NDUFA4L2	gliogenic_outer_RGCs_and_astrocytes
SPNS2	3.64058	3.09096	80.4113	9.24924e-05	0.015201	SPNS2	gliogenic_outer_RGCs_and_astrocytes
NOG	-2.52339	3.33255	80.4001	9.25295e-05	0.015201	NOG	gliogenic_outer_RGCs_and_astrocytes
GDAP1L1	-1.46985	5.01762	80.8924	9.09123e-05	0.015201	GDAP1L1	gliogenic_outer_RGCs_and_astrocytes
SLC2A1	-1.6471	8.21476	79.2664	9.64012e-05	0.0152985	SLC2A1	gliogenic_outer_RGCs_and_astrocytes
PHLDA3	-3.462	3.33994	79.2741	9.6374e-05	0.0152985	PHLDA3	gliogenic_outer_RGCs_and_astrocytes
MEST	-3.40366	7.19232	78.954	9.75054e-05	0.0152985	MEST	gliogenic_outer_RGCs_and_astrocytes
WISP2	3.9763	3.01639	78.9968	9.73532e-05	0.0152985	WISP2	gliogenic_outer_RGCs_and_astrocytes
SIPA1L2	-2.39267	4.46423	75.8441	0.000109472	0.0155986	SIPA1L2	gliogenic_outer_RGCs_and_astrocytes
PTX3	-2.09525	3.47782	76.9926	0.000104837	0.0155986	PTX3	gliogenic_outer_RGCs_and_astrocytes
ZMAT3	-2.24575	5.13955	76.2824	0.000107672	0.0155986	ZMAT3	gliogenic_outer_RGCs_and_astrocytes
SEL1L3	2.70677	3.99479	76.9411	0.00010504	0.0155986	SEL1L3	gliogenic_outer_RGCs_and_astrocytes
NCOA7	1.55464	5.03332	77.7571	0.000101895	0.0155986	NCOA7	gliogenic_outer_RGCs_and_astrocytes
DCC	-1.58348	4.10672	75.9571	0.000109004	0.0155986	DCC	gliogenic_outer_RGCs_and_astrocytes
RAB3A	-1.23115	6.21526	76.795	0.000105616	0.0155986	RAB3A	gliogenic_outer_RGCs_and_astrocytes
ZNF738	-1.27709	5.41534	77.1412	0.000104257	0.0155986	ZNF738	gliogenic_outer_RGCs_and_astrocytes
SSBP3	-1.02325	6.74397	74.7762	0.000114028	0.0160838	SSBP3	gliogenic_outer_RGCs_and_astrocytes
DLL1	-2.92664	4.98281	73.7199	0.000118785	0.0165872	DLL1	gliogenic_outer_RGCs_and_astrocytes
ADI1	1.61201	4.6753	70.5465	0.000134758	0.0168419	ADI1	gliogenic_outer_RGCs_and_astrocytes
MEIS1	-4.36172	4.08101	70.285	0.000136198	0.0168419	MEIS1	gliogenic_outer_RGCs_and_astrocytes
EPHA6	3.8039	4.12076	71.6938	0.000128672	0.0168419	EPHA6	gliogenic_outer_RGCs_and_astrocytes
CAMK2N2	-2.37561	2.88507	71.6905	0.000128689	0.0168419	CAMK2N2	gliogenic_outer_RGCs_and_astrocytes
PPP2R2B	1.77498	6.28333	70.1788	0.000136789	0.0168419	PPP2R2B	gliogenic_outer_RGCs_and_astrocytes
TLN1	1.38038	5.15753	72.7714	0.000123284	0.0168419	TLN1	gliogenic_outer_RGCs_and_astrocytes
TMOD1	3.71774	2.79633	69.81	0.000138866	0.0168419	TMOD1	gliogenic_outer_RGCs_and_astrocytes
PTGR1	-1.69756	4.95079	69.8169	0.000138827	0.0168419	PTGR1	gliogenic_outer_RGCs_and_astrocytes
NEAT1	-2.66518	8.99402	70.3994	0.000135565	0.0168419	NEAT1	gliogenic_outer_RGCs_and_astrocytes
LIMA1	1.71148	4.66082	70.5215	0.000134895	0.0168419	LIMA1	gliogenic_outer_RGCs_and_astrocytes
ERO1A	-1.25181	6.04496	71.9195	0.000127518	0.0168419	ERO1A	gliogenic_outer_RGCs_and_astrocytes
DLK1	-3.97118	5.82127	69.628	0.000139907	0.0168419	DLK1	gliogenic_outer_RGCs_and_astrocytes
PPDPF	-1.17293	8.9713	72.5472	0.00012438	0.0168419	PPDPF	gliogenic_outer_RGCs_and_astrocytes
WNT7B	-3.0541	5.78386	71.7216	0.00012853	0.0168419	WNT7B	gliogenic_outer_RGCs_and_astrocytes
ZFHX3	-1.5025	4.69363	68.8965	0.000144196	0.0172099	ZFHX3	gliogenic_outer_RGCs_and_astrocytes
CHST10	1.57678	5.69998	68.0659	0.000149281	0.0176657	CHST10	gliogenic_outer_RGCs_and_astrocytes
WASF3	-1.19373	5.25746	67.7002	0.000151594	0.0177888	WASF3	gliogenic_outer_RGCs_and_astrocytes
CNTNAP3B	-1.87905	3.83713	66.9715	0.000156349	0.0181938	CNTNAP3B	gliogenic_outer_RGCs_and_astrocytes
SEZ6L	1.98885	5.49401	66.4869	0.00015962	0.0184209	SEZ6L	gliogenic_outer_RGCs_and_astrocytes
HIBADH	-1.78248	3.5383	66.2377	0.000161337	0.0184665	HIBADH	gliogenic_outer_RGCs_and_astrocytes
CDK6	-1.94751	3.93212	65.687	0.000165221	0.0185979	CDK6	gliogenic_outer_RGCs_and_astrocytes
LRRC10B	3.31142	4.82075	65.5982	0.000165859	0.0185979	LRRC10B	gliogenic_outer_RGCs_and_astrocytes
CXXC4	-2.67052	4.14378	64.3787	0.000174957	0.0190867	CXXC4	gliogenic_outer_RGCs_and_astrocytes
WWTR1	-1.87209	3.71025	63.3615	0.000183058	0.0198157	WWTR1	gliogenic_outer_RGCs_and_astrocytes
EPHA5	1.50188	4.33605	61.0169	0.000203719	0.0199592	EPHA5	gliogenic_outer_RGCs_and_astrocytes
PURPL	-8.33258	1.54722	88.4054	0.000193344	0.0199592	PURPL	gliogenic_outer_RGCs_and_astrocytes
KLF10	-1.37643	5.1402	61.2923	0.000201137	0.0199592	KLF10	gliogenic_outer_RGCs_and_astrocytes
GADD45G	1.24912	6.49061	61.1088	0.000202852	0.0199592	GADD45G	gliogenic_outer_RGCs_and_astrocytes
GNG3	-1.48788	4.54676	62.8198	0.000187576	0.0199592	GNG3	gliogenic_outer_RGCs_and_astrocytes
ENO2	-1.18373	8.41012	61.0471	0.000203434	0.0199592	ENO2	gliogenic_outer_RGCs_and_astrocytes
NDUFB1	1.00982	7.06984	61.1374	0.000202584	0.0199592	NDUFB1	gliogenic_outer_RGCs_and_astrocytes
THSD4	-2.16089	2.87572	60.7957	0.000205824	0.0199592	THSD4	gliogenic_outer_RGCs_and_astrocytes
CMIP	-1.10559	5.50045	62.3123	0.000191943	0.0199592	CMIP	gliogenic_outer_RGCs_and_astrocytes
TRIM47	3.63354	2.72563	60.8603	0.000205207	0.0199592	TRIM47	gliogenic_outer_RGCs_and_astrocytes
DOCK6	-2.20448	2.72431	61.9442	0.000195195	0.0199592	DOCK6	gliogenic_outer_RGCs_and_astrocytes
WTIP	-1.74445	3.71035	61.0764	0.000203157	0.0199592	WTIP	gliogenic_outer_RGCs_and_astrocytes
FOXK1	-1.17423	5.35289	60.2385	0.000211259	0.0199643	FOXK1	gliogenic_outer_RGCs_and_astrocytes
RRM2B	-1.72558	4.33196	60.5071	0.000208616	0.0199643	RRM2B	gliogenic_outer_RGCs_and_astrocytes
NDRG2	1.78221	4.28836	59.5276	0.000218471	0.0202772	NDRG2	gliogenic_outer_RGCs_and_astrocytes
SOCS3	-6.06852	3.62006	59.6945	0.000216748	0.0202772	SOCS3	gliogenic_outer_RGCs_and_astrocytes
LINC00672	-1.82356	3.82721	59.1054	0.000222908	0.0203444	LINC00672	gliogenic_outer_RGCs_and_astrocytes
BCAT1	-1.23661	6.26109	58.8477	0.000225676	0.0204633	BCAT1	gliogenic_outer_RGCs_and_astrocytes
IGDCC3	-1.55594	4.64528	58.1989	0.000232849	0.0208529	IGDCC3	gliogenic_outer_RGCs_and_astrocytes
ALYREF	-1.25631	5.66332	58.1891	0.00023296	0.0208529	ALYREF	gliogenic_outer_RGCs_and_astrocytes
DRAXIN	-1.11476	6.4005	57.3566	0.000242619	0.0210827	DRAXIN	gliogenic_outer_RGCs_and_astrocytes
FGF13	-1.18541	4.51824	57.3183	0.000243076	0.0210827	FGF13	gliogenic_outer_RGCs_and_astrocytes
SCG5	-1.2439	4.58881	57.3663	0.000242504	0.0210827	SCG5	gliogenic_outer_RGCs_and_astrocytes
RNF112	3.47856	3.6712	57.5464	0.000240371	0.0210827	RNF112	gliogenic_outer_RGCs_and_astrocytes
TTC9B	1.25606	4.90631	57.6097	0.000239626	0.0210827	TTC9B	gliogenic_outer_RGCs_and_astrocytes
DMRTA1	-3.40171	2.23745	57.0659	0.000246116	0.0211687	DMRTA1	gliogenic_outer_RGCs_and_astrocytes
IGSF10	2.52952	5.16604	55.9502	0.000260179	0.0214615	IGSF10	gliogenic_outer_RGCs_and_astrocytes
FBN2	-2.52897	2.51339	56.3751	0.0002547	0.0214615	FBN2	gliogenic_outer_RGCs_and_astrocytes
AC090204.1	-2.15418	4.27181	55.8871	0.000261004	0.0214615	AC090204.1	gliogenic_outer_RGCs_and_astrocytes
PRR34-AS1	2.27546	4.56177	55.8786	0.000261117	0.0214615	PRR34-AS1	gliogenic_outer_RGCs_and_astrocytes
CALM1	1.06968	9.54274	55.5332	0.000265707	0.0216979	CALM1	gliogenic_outer_RGCs_and_astrocytes
LPL	2.09059	3.56633	55.0675	0.000272067	0.0219587	LPL	gliogenic_outer_RGCs_and_astrocytes
MAB21L1	-2.79915	2.92378	54.956	0.000273619	0.0219587	MAB21L1	gliogenic_outer_RGCs_and_astrocytes
ID2	-1.00022	7.07024	54.1097	0.000285795	0.0222952	ID2	gliogenic_outer_RGCs_and_astrocytes
KBTBD11-OT1	2.95309	2.786	54.5375	0.000279553	0.0222952	KBTBD11-OT1	gliogenic_outer_RGCs_and_astrocytes
EBF2	-5.51227	1.45551	54.1137	0.000285736	0.0222952	EBF2	gliogenic_outer_RGCs_and_astrocytes
AEN	-2.50178	2.35209	54.3183	0.000282727	0.0222952	AEN	gliogenic_outer_RGCs_and_astrocytes
AL445472.1	1.61913	3.96749	53.8639	0.000289466	0.0223794	AL445472.1	gliogenic_outer_RGCs_and_astrocytes
ARNTL	2.96391	2.79515	53.6463	0.000292766	0.0224606	ARNTL	gliogenic_outer_RGCs_and_astrocytes
MROH8	1.21032	5.27796	53.5431	0.000294349	0.0224606	MROH8	gliogenic_outer_RGCs_and_astrocytes
CA9	3.35207	5.06505	53.2109	0.000299525	0.0226408	CA9	gliogenic_outer_RGCs_and_astrocytes
MN1	-1.77741	4.32915	53.1837	0.000299953	0.0226408	MN1	gliogenic_outer_RGCs_and_astrocytes
CTNNB1	-1.27317	6.77274	52.6306	0.000308856	0.0231875	CTNNB1	gliogenic_outer_RGCs_and_astrocytes
MIR34AHG	-7.81738	1.09367	71.737	0.000322227	0.023682	MIR34AHG	gliogenic_outer_RGCs_and_astrocytes
LTBP1	1.7504	4.82389	51.8556	0.000321929	0.023682	LTBP1	gliogenic_outer_RGCs_and_astrocytes
GFRA1	-3.57233	1.37655	51.8578	0.000321891	0.023682	GFRA1	gliogenic_outer_RGCs_and_astrocytes
RGPD5	-1.99434	3.11929	51.4517	0.000329033	0.0239975	RGPD5	gliogenic_outer_RGCs_and_astrocytes
AC007938.3	-2.28621	3.04184	51.4	0.000329958	0.0239975	AC007938.3	gliogenic_outer_RGCs_and_astrocytes
GADD45A	-1.85913	5.81562	50.9761	0.000337667	0.0242818	GADD45A	gliogenic_outer_RGCs_and_astrocytes
ANKRD33B	-2.5419	3.61246	50.8471	0.000340062	0.0242818	ANKRD33B	gliogenic_outer_RGCs_and_astrocytes
OGFRL1	1.70732	4.36994	50.9935	0.000337347	0.0242818	OGFRL1	gliogenic_outer_RGCs_and_astrocytes
SFMBT2	-1.89491	3.27184	50.8063	0.000340822	0.0242818	SFMBT2	gliogenic_outer_RGCs_and_astrocytes
PCDH10	-2.70991	3.19915	50.6529	0.000343707	0.0243631	PCDH10	gliogenic_outer_RGCs_and_astrocytes
TNC	2.58567	4.95596	50.057	0.000355224	0.024857	TNC	gliogenic_outer_RGCs_and_astrocytes
RHPN2	-1.89584	3.17615	50.017	0.000356015	0.024857	RHPN2	gliogenic_outer_RGCs_and_astrocytes
LRP2	-5.18473	3.73807	49.5628	0.000365164	0.025027	LRP2	gliogenic_outer_RGCs_and_astrocytes
CNTN4	3.82432	2.40374	49.5407	0.000365619	0.025027	CNTN4	gliogenic_outer_RGCs_and_astrocytes
MEF2C	1.20402	5.29429	49.741	0.000361539	0.025027	MEF2C	gliogenic_outer_RGCs_and_astrocytes
GPR22	3.62543	2.72906	49.641	0.000363568	0.025027	GPR22	gliogenic_outer_RGCs_and_astrocytes
SNCG	-1.62985	3.48427	49.4266	0.000367969	0.025065	SNCG	gliogenic_outer_RGCs_and_astrocytes
TMEM128	-1.18991	5.16041	48.4744	0.000388398	0.0263037	TMEM128	gliogenic_outer_RGCs_and_astrocytes
PXN	-1.80621	3.61566	48.406	0.000389921	0.0263037	PXN	gliogenic_outer_RGCs_and_astrocytes
CDKL2	1.65087	3.79233	48.0555	0.000397859	0.0265823	CDKL2	gliogenic_outer_RGCs_and_astrocytes
TRIM22	-4.75844	1.31921	47.7921	0.000403968	0.0267906	TRIM22	gliogenic_outer_RGCs_and_astrocytes
SAMD1	1.24113	6.36109	47.756	0.000404813	0.0267906	SAMD1	gliogenic_outer_RGCs_and_astrocytes
SAMD4A	2.26555	3.63455	47.4068	0.000413125	0.0271001	SAMD4A	gliogenic_outer_RGCs_and_astrocytes
TSHR	4.73726	2.3718	47.3483	0.000414542	0.0271001	TSHR	gliogenic_outer_RGCs_and_astrocytes
HOXB-AS1	-5.00891	1.07027	47.3165	0.000415312	0.0271001	HOXB-AS1	gliogenic_outer_RGCs_and_astrocytes
RIC3	-1.18867	4.54128	47.2321	0.00041737	0.0271077	RIC3	gliogenic_outer_RGCs_and_astrocytes
FSTL5	-1.93678	2.96906	47.1413	0.000419598	0.0271262	FSTL5	gliogenic_outer_RGCs_and_astrocytes
FILIP1	1.99161	4.23945	47.0372	0.000422173	0.0271669	FILIP1	gliogenic_outer_RGCs_and_astrocytes
SLC6A8	-1.02415	5.79564	46.5891	0.000433496	0.0276408	SLC6A8	gliogenic_outer_RGCs_and_astrocytes
IER5	-1.22213	5.67864	45.8763	0.000452351	0.0279961	IER5	gliogenic_outer_RGCs_and_astrocytes
KIAA1211L	2.82198	3.11099	45.7102	0.0004569	0.0279961	KIAA1211L	gliogenic_outer_RGCs_and_astrocytes
C2orf49	1.16965	5.94204	45.9209	0.00045114	0.0279961	C2orf49	gliogenic_outer_RGCs_and_astrocytes
CMTM7	-4.57967	1.72675	45.5124	0.000462399	0.0279961	CMTM7	gliogenic_outer_RGCs_and_astrocytes
RASL11B	1.9237	3.58774	46.2369	0.00044268	0.0279961	RASL11B	gliogenic_outer_RGCs_and_astrocytes
SYTL2	-3.09721	3.11654	45.4865	0.000463126	0.0279961	SYTL2	gliogenic_outer_RGCs_and_astrocytes
PDE1B	-3.68813	1.48167	45.5317	0.000461857	0.0279961	PDE1B	gliogenic_outer_RGCs_and_astrocytes
HSPH1	1.2667	6.39163	45.5702	0.000460783	0.0279961	HSPH1	gliogenic_outer_RGCs_and_astrocytes
DIAPH3	2.08429	3.18544	45.9939	0.000449166	0.0279961	DIAPH3	gliogenic_outer_RGCs_and_astrocytes
LINC02256	2.36538	3.18576	45.9265	0.00045099	0.0279961	LINC02256	gliogenic_outer_RGCs_and_astrocytes
RPS27L	-1.46253	8.10366	45.1876	0.000471618	0.0281922	RPS27L	gliogenic_outer_RGCs_and_astrocytes
GRIK2	2.53311	3.56672	44.5534	0.000490331	0.0288902	GRIK2	gliogenic_outer_RGCs_and_astrocytes
JOSD2	1.98478	4.18311	44.5585	0.000490175	0.0288902	JOSD2	gliogenic_outer_RGCs_and_astrocytes
NMU	-2.85381	2.02475	44.4358	0.000493909	0.0289787	NMU	gliogenic_outer_RGCs_and_astrocytes
ABHD17C	-1.86891	3.64911	44.2468	0.000499731	0.0290277	ABHD17C	gliogenic_outer_RGCs_and_astrocytes
PDZRN3	-1.84426	2.72084	43.8685	0.000511661	0.0295241	PDZRN3	gliogenic_outer_RGCs_and_astrocytes
AGRN	-1.05028	5.32506	43.5407	0.000522307	0.0300144	AGRN	gliogenic_outer_RGCs_and_astrocytes
INSIG2	-1.49522	7.30196	43.3504	0.000528621	0.0300486	INSIG2	gliogenic_outer_RGCs_and_astrocytes
ACKR3	-2.23556	3.75534	42.875	0.000544845	0.0300486	ACKR3	gliogenic_outer_RGCs_and_astrocytes
ABCA1	-2.81037	2.81474	42.764	0.000548726	0.0300486	ABCA1	gliogenic_outer_RGCs_and_astrocytes
PDE2A	3.26165	3.05311	43.163	0.00053494	0.0300486	PDE2A	gliogenic_outer_RGCs_and_astrocytes
CCDC3	-2.82521	1.62193	43.412	0.000526565	0.0300486	CCDC3	gliogenic_outer_RGCs_and_astrocytes
LLGL1	-1.28356	3.91135	42.9027	0.000543881	0.0300486	LLGL1	gliogenic_outer_RGCs_and_astrocytes
GREB1L	-4.27278	2.77541	43.2439	0.0005322	0.0300486	GREB1L	gliogenic_outer_RGCs_and_astrocytes
AC010319.3	1.69364	4.42019	43.0456	0.000538947	0.0300486	AC010319.3	gliogenic_outer_RGCs_and_astrocytes
MYADM	-2.06657	4.10161	43.0796	0.000537782	0.0300486	MYADM	gliogenic_outer_RGCs_and_astrocytes
TYRO3	-1.417	3.76657	42.6315	0.00055341	0.0301868	TYRO3	gliogenic_outer_RGCs_and_astrocytes
CEBPZOS	1.18227	4.64409	42.2455	0.000567357	0.0308271	CEBPZOS	gliogenic_outer_RGCs_and_astrocytes
TEAD3	-1.81462	3.10024	42.0144	0.00057593	0.0310513	TEAD3	gliogenic_outer_RGCs_and_astrocytes
PPP1R16A	1.06189	4.67231	42.0343	0.000575188	0.0310513	PPP1R16A	gliogenic_outer_RGCs_and_astrocytes
EPHB2	-1.35003	5.48445	41.8777	0.000581083	0.0312086	EPHB2	gliogenic_outer_RGCs_and_astrocytes
PAPPA2	2.98433	3.05548	41.6001	0.000591736	0.0313757	PAPPA2	gliogenic_outer_RGCs_and_astrocytes
BHLHE40	-1.04218	6.05685	41.6448	0.000590004	0.0313757	BHLHE40	gliogenic_outer_RGCs_and_astrocytes
KIAA1257	-2.61216	2.44774	41.5679	0.000592991	0.0313757	KIAA1257	gliogenic_outer_RGCs_and_astrocytes
ATP1A3	-1.05477	4.59761	41.4246	0.000598608	0.0315432	ATP1A3	gliogenic_outer_RGCs_and_astrocytes
PAX3	-5.74824	4.59523	41.1705	0.00060874	0.0316885	PAX3	gliogenic_outer_RGCs_and_astrocytes
RNF150	-1.41111	4.45434	41.2461	0.0006057	0.0316885	RNF150	gliogenic_outer_RGCs_and_astrocytes
FNDC5	-2.36055	2.41346	40.9276	0.000618642	0.0319953	FNDC5	gliogenic_outer_RGCs_and_astrocytes
NLGN1	1.27483	5.96299	40.8564	0.000621581	0.0320286	NLGN1	gliogenic_outer_RGCs_and_astrocytes
GPC3	-3.22807	1.43723	40.3721	0.000642098	0.0323468	GPC3	gliogenic_outer_RGCs_and_astrocytes
PNCK	-1.59386	3.02364	40.2228	0.000648604	0.0323468	PNCK	gliogenic_outer_RGCs_and_astrocytes
L1CAM	-1.27917	3.87585	40.2287	0.000648345	0.0323468	L1CAM	gliogenic_outer_RGCs_and_astrocytes
MLC1	2.01383	3.50426	40.5113	0.000636113	0.0323468	MLC1	gliogenic_outer_RGCs_and_astrocytes
CXADR	-1.21505	6.57364	40.2778	0.000646198	0.0323468	CXADR	gliogenic_outer_RGCs_and_astrocytes
ZNF521	-1.2076	4.78004	40.1552	0.000651577	0.0323794	ZNF521	gliogenic_outer_RGCs_and_astrocytes
LGR4	-4.21659	2.72192	40.0962	0.000654189	0.032394	LGR4	gliogenic_outer_RGCs_and_astrocytes
IRAK4	-5.50591	0.782099	40.0122	0.000657928	0.032464	IRAK4	gliogenic_outer_RGCs_and_astrocytes
TNNI1	-7.67402	0.953748	53.054	0.000666317	0.032533	TNNI1	gliogenic_outer_RGCs_and_astrocytes
EBF3	-2.50037	2.1204	39.9072	0.000662646	0.032533	EBF3	gliogenic_outer_RGCs_and_astrocytes
DNER	-1.38379	6.31813	39.3911	0.000686489	0.0331054	DNER	gliogenic_outer_RGCs_and_astrocytes
CHAC1	1.29555	4.18632	39.4006	0.000686038	0.0331054	CHAC1	gliogenic_outer_RGCs_and_astrocytes
IRX3	-5.48902	4.31558	39.3692	0.000687523	0.0331054	IRX3	gliogenic_outer_RGCs_and_astrocytes
PLK2	-2.27399	4.10407	38.7809	0.000716167	0.0338763	PLK2	gliogenic_outer_RGCs_and_astrocytes
ZNF467	-1.42655	4.0765	38.7425	0.000718088	0.0338763	ZNF467	gliogenic_outer_RGCs_and_astrocytes
FAM222A	-2.52798	1.91905	38.661	0.000722195	0.0338852	FAM222A	gliogenic_outer_RGCs_and_astrocytes
TUSC1	3.55969	3.50435	38.3112	0.000740178	0.0342542	TUSC1	gliogenic_outer_RGCs_and_astrocytes
PLXNC1	-2.42224	2.12321	38.299	0.000740818	0.0342542	PLXNC1	gliogenic_outer_RGCs_and_astrocytes
CDR1	2.71497	3.00387	38.1779	0.000747188	0.0344341	CDR1	gliogenic_outer_RGCs_and_astrocytes
HLF	2.52605	2.65745	37.9615	0.000758758	0.0344341	HLF	gliogenic_outer_RGCs_and_astrocytes
JAG1	-3.97396	4.69127	38.0238	0.000755399	0.0344341	JAG1	gliogenic_outer_RGCs_and_astrocytes
DNAJB1	1.01417	5.60054	38.0771	0.000752546	0.0344341	DNAJB1	gliogenic_outer_RGCs_and_astrocytes
NUAK2	-1.77533	2.93969	37.6339	0.00077672	0.0351007	NUAK2	gliogenic_outer_RGCs_and_astrocytes
TAGLN3	-2.2689	6.43042	37.4342	0.000787953	0.0353794	TAGLN3	gliogenic_outer_RGCs_and_astrocytes
SPRY2	-1.9961	4.16149	37.4575	0.00078663	0.0353794	SPRY2	gliogenic_outer_RGCs_and_astrocytes
SLC29A1	-1.84662	2.81287	37.246	0.000798731	0.0354079	SLC29A1	gliogenic_outer_RGCs_and_astrocytes
IRF1	-2.16834	2.91218	37.1463	0.000804522	0.0355517	IRF1	gliogenic_outer_RGCs_and_astrocytes
EPHB3	-1.73707	3.25681	37.0788	0.000808478	0.0356138	EPHB3	gliogenic_outer_RGCs_and_astrocytes
PRDM13	-7.85924	1.17163	48.6839	0.000817239	0.0357741	PRDM13	gliogenic_outer_RGCs_and_astrocytes
TLN2	1.4107	4.31886	36.8822	0.00082013	0.0357884	TLN2	gliogenic_outer_RGCs_and_astrocytes
RETREG1	1.36455	3.85695	36.6164	0.00083625	0.0358456	RETREG1	gliogenic_outer_RGCs_and_astrocytes
SYNE1	1.47258	5.17262	36.6631	0.000833389	0.0358456	SYNE1	gliogenic_outer_RGCs_and_astrocytes
PRMT8	-3.10825	1.47444	36.7335	0.000829099	0.0358456	PRMT8	gliogenic_outer_RGCs_and_astrocytes
MAP2K6	1.20849	5.89619	36.6134	0.000836436	0.0358456	MAP2K6	gliogenic_outer_RGCs_and_astrocytes
ADCYAP1	-3.78435	0.869221	36.6068	0.000836842	0.0358456	ADCYAP1	gliogenic_outer_RGCs_and_astrocytes
CRYAB	2.22413	3.68217	36.3876	0.00085046	0.0362068	CRYAB	gliogenic_outer_RGCs_and_astrocytes
NEFM	-1.29754	4.75945	36.2118	0.000861603	0.0365697	NEFM	gliogenic_outer_RGCs_and_astrocytes
RAB3GAP2	1.12801	6.60149	36.159	0.000864986	0.036602	RAB3GAP2	gliogenic_outer_RGCs_and_astrocytes
PCP4L1	-2.74996	1.84574	35.9882	0.00087605	0.0367181	PCP4L1	gliogenic_outer_RGCs_and_astrocytes
EIF2B4	1.027	4.83481	35.9678	0.000877386	0.0367181	EIF2B4	gliogenic_outer_RGCs_and_astrocytes
RFC3	1.20536	4.4534	36.0731	0.000870526	0.0367181	RFC3	gliogenic_outer_RGCs_and_astrocytes
PLXNB2	-1.03123	4.62927	35.7055	0.000894776	0.0371865	PLXNB2	gliogenic_outer_RGCs_and_astrocytes
PAX7	-6.78536	2.81874	35.6187	0.000900635	0.0372691	PAX7	gliogenic_outer_RGCs_and_astrocytes
TRPM4	-2.06415	3.44206	35.5579	0.000904771	0.0372691	TRPM4	gliogenic_outer_RGCs_and_astrocytes
PER3	1.71344	3.49764	35.0188	0.000942538	0.0374337	PER3	gliogenic_outer_RGCs_and_astrocytes
EPHA2	-2.41408	1.85642	35.3003	0.000922563	0.0374337	EPHA2	gliogenic_outer_RGCs_and_astrocytes
PLK3	-2.49978	3.00532	35.3325	0.000920314	0.0374337	PLK3	gliogenic_outer_RGCs_and_astrocytes
MLF1	-1.09602	5.95412	34.9511	0.000947428	0.0374337	MLF1	gliogenic_outer_RGCs_and_astrocytes
GNAI1	-1.20185	4.45927	34.9691	0.000946124	0.0374337	GNAI1	gliogenic_outer_RGCs_and_astrocytes
AHNAK	1.41714	4.11999	35.0648	0.000939236	0.0374337	AHNAK	gliogenic_outer_RGCs_and_astrocytes
GAS6	-1.16701	4.12359	35.0225	0.000942272	0.0374337	GAS6	gliogenic_outer_RGCs_and_astrocytes
ATF7IP2	-1.79274	2.77448	35.2707	0.000924633	0.0374337	ATF7IP2	gliogenic_outer_RGCs_and_astrocytes
MMP15	-2.1326	2.72335	35.4525	0.000911997	0.0374337	MMP15	gliogenic_outer_RGCs_and_astrocytes
UNC119	-1.19835	6.57403	35.1246	0.000934963	0.0374337	UNC119	gliogenic_outer_RGCs_and_astrocytes
GFAP	7.55775	2.02284	46.0921	0.000929945	0.0374337	GFAP	gliogenic_outer_RGCs_and_astrocytes
HRH3	-1.72018	3.03065	35.1029	0.000936514	0.0374337	HRH3	gliogenic_outer_RGCs_and_astrocytes
ZNF324	1.14563	4.22593	35.0649	0.000939231	0.0374337	ZNF324	gliogenic_outer_RGCs_and_astrocytes
CYR61	-1.72768	5.23042	34.854	0.000954502	0.0374401	CYR61	gliogenic_outer_RGCs_and_astrocytes
TDP1	1.39266	4.67504	34.8122	0.000957566	0.0374551	TDP1	gliogenic_outer_RGCs_and_astrocytes
ID3	-3.94653	2.58656	34.6139	0.000972295	0.0375059	ID3	gliogenic_outer_RGCs_and_astrocytes
SLC27A3	-1.37186	4.61724	34.6524	0.000969408	0.0375059	SLC27A3	gliogenic_outer_RGCs_and_astrocytes
HSD17B11	-1.46646	3.58881	34.6442	0.000970021	0.0375059	HSD17B11	gliogenic_outer_RGCs_and_astrocytes
C1QTNF4	-1.30681	3.52518	34.6154	0.000972182	0.0375059	C1QTNF4	gliogenic_outer_RGCs_and_astrocytes
STARD4	-1.06021	5.77045	34.5288	0.000978706	0.03751	STARD4	gliogenic_outer_RGCs_and_astrocytes
TLE2	2.54105	2.68016	34.5056	0.000980462	0.03751	TLE2	gliogenic_outer_RGCs_and_astrocytes
RCN3	-2.13411	2.72731	34.5691	0.000975659	0.03751	RCN3	gliogenic_outer_RGCs_and_astrocytes
DBI	1.16901	7.42593	34.2587	0.000999428	0.0376399	DBI	gliogenic_outer_RGCs_and_astrocytes
PTH2R	4.69135	2.34549	34.3182	0.000994816	0.0376399	PTH2R	gliogenic_outer_RGCs_and_astrocytes
ATP6V1G2	-1.00146	4.69135	34.2788	0.000997866	0.0376399	ATP6V1G2	gliogenic_outer_RGCs_and_astrocytes
TRIM8	-1.14176	5.89152	34.251	0.00100003	0.0376399	TRIM8	gliogenic_outer_RGCs_and_astrocytes
PCYT2	1.20761	4.12132	34.2903	0.000996975	0.0376399	PCYT2	gliogenic_outer_RGCs_and_astrocytes
BLCAP	-1.0773	6.43473	34.4074	0.000987948	0.0376399	BLCAP	gliogenic_outer_RGCs_and_astrocytes
VSNL1	3.42235	3.63267	34.1794	0.00100562	0.0376544	VSNL1	gliogenic_outer_RGCs_and_astrocytes
AFF3	1.08492	4.89217	34.0735	0.00101398	0.0377578	AFF3	gliogenic_outer_RGCs_and_astrocytes
PLOD1	2.08378	5.7497	33.6037	0.00105215	0.0379667	PLOD1	gliogenic_outer_RGCs_and_astrocytes
GAD1	-2.06975	3.16877	33.9273	0.00102565	0.0379667	GAD1	gliogenic_outer_RGCs_and_astrocytes
CADPS	1.93291	6.28957	33.603	0.00105221	0.0379667	CADPS	gliogenic_outer_RGCs_and_astrocytes
DUSP1	-1.22055	5.31131	33.7159	0.00104287	0.0379667	DUSP1	gliogenic_outer_RGCs_and_astrocytes
POU3F2	-2.38603	5.56266	33.7036	0.00104388	0.0379667	POU3F2	gliogenic_outer_RGCs_and_astrocytes
AKAP12	1.94914	8.32468	33.7909	0.00103672	0.0379667	AKAP12	gliogenic_outer_RGCs_and_astrocytes
MDM1	1.30485	5.44299	33.9295	0.00102548	0.0379667	MDM1	gliogenic_outer_RGCs_and_astrocytes
PKD1	1.12562	6.03823	33.7385	0.001041	0.0379667	PKD1	gliogenic_outer_RGCs_and_astrocytes
UBE2V1	1.46428	3.59022	33.6151	0.00105121	0.0379667	UBE2V1	gliogenic_outer_RGCs_and_astrocytes
CDC42EP5	-3.92815	0.970762	33.7053	0.00104374	0.0379667	CDC42EP5	gliogenic_outer_RGCs_and_astrocytes
PHYHIPL	-1.49361	4.75158	33.387	0.00107041	0.0383281	PHYHIPL	gliogenic_outer_RGCs_and_astrocytes
DDIT3	1.23926	7.25332	33.3864	0.00107046	0.0383281	DDIT3	gliogenic_outer_RGCs_and_astrocytes
PDLIM7	-1.01797	5.7488	33.2891	0.00107879	0.0383315	PDLIM7	gliogenic_outer_RGCs_and_astrocytes
TFAP2B	-5.15911	3.26701	33.302	0.00107768	0.0383315	TFAP2B	gliogenic_outer_RGCs_and_astrocytes
PACSIN3	2.43636	2.59444	33.3349	0.00107486	0.0383315	PACSIN3	gliogenic_outer_RGCs_and_astrocytes
ATP10D	1.63647	3.28295	33.2433	0.00108275	0.0383321	ATP10D	gliogenic_outer_RGCs_and_astrocytes
AL049840.1	1.57477	3.75443	33.1813	0.00108813	0.0383703	AL049840.1	gliogenic_outer_RGCs_and_astrocytes
CXorf57	-5.28829	0.611264	33.0944	0.00109573	0.0385411	CXorf57	gliogenic_outer_RGCs_and_astrocytes
ESPN	-2.32313	4.32702	32.727	0.00112866	0.0395003	ESPN	gliogenic_outer_RGCs_and_astrocytes
NEDD9	1.24309	4.53743	32.5217	0.00114763	0.0399639	NEDD9	gliogenic_outer_RGCs_and_astrocytes
GAP43	1.11858	7.87708	32.3112	0.00116753	0.0400573	GAP43	gliogenic_outer_RGCs_and_astrocytes
ZIC1	-4.99237	5.47976	32.3363	0.00116514	0.0400573	ZIC1	gliogenic_outer_RGCs_and_astrocytes
ASPHD2	-1.45511	2.96063	32.3373	0.00116504	0.0400573	ASPHD2	gliogenic_outer_RGCs_and_astrocytes
TOX	-1.79981	3.78097	32.2066	0.00117759	0.0400891	TOX	gliogenic_outer_RGCs_and_astrocytes
PTPN3	-2.27147	1.76588	32.1823	0.00117994	0.0400891	PTPN3	gliogenic_outer_RGCs_and_astrocytes
SLC16A6	-1.7766	2.87638	32.2044	0.0011778	0.0400891	SLC16A6	gliogenic_outer_RGCs_and_astrocytes
CAMKV	2.58379	3.72393	31.9728	0.00120048	0.0401041	CAMKV	gliogenic_outer_RGCs_and_astrocytes
HOMER1	-1.28915	3.63942	31.9788	0.00119989	0.0401041	HOMER1	gliogenic_outer_RGCs_and_astrocytes
AKNA	1.28719	4.3686	32.0515	0.00119271	0.0401041	AKNA	gliogenic_outer_RGCs_and_astrocytes
PPP1R1A	-3.22637	5.44409	32.0969	0.00118826	0.0401041	PPP1R1A	gliogenic_outer_RGCs_and_astrocytes
ERBB2	-1.43194	3.32692	32.1397	0.00118407	0.0401041	ERBB2	gliogenic_outer_RGCs_and_astrocytes
INSM1	-1.14368	3.9174	31.9934	0.00119844	0.0401041	INSM1	gliogenic_outer_RGCs_and_astrocytes
PDGFC	-1.22199	3.95855	31.9019	0.00120755	0.0401481	PDGFC	gliogenic_outer_RGCs_and_astrocytes
TNFRSF10D	-2.58855	2.55142	31.9044	0.00120729	0.0401481	TNFRSF10D	gliogenic_outer_RGCs_and_astrocytes
KREMEN1	-1.90235	2.29083	31.8318	0.00121458	0.0402859	KREMEN1	gliogenic_outer_RGCs_and_astrocytes
ALPK1	2.75068	2.86149	31.7973	0.00121806	0.0403057	ALPK1	gliogenic_outer_RGCs_and_astrocytes
STAT3	-1.16322	5.56198	31.7215	0.00122576	0.0404646	STAT3	gliogenic_outer_RGCs_and_astrocytes
SCN3A	-1.65078	2.78218	31.6554	0.00123252	0.0405452	SCN3A	gliogenic_outer_RGCs_and_astrocytes
NPC2	-1.09296	6.32927	31.6409	0.00123401	0.0405452	NPC2	gliogenic_outer_RGCs_and_astrocytes
MED12L	1.78281	4.21463	31.0207	0.00130007	0.04183	MED12L	gliogenic_outer_RGCs_and_astrocytes
CPXM1	-1.03314	4.0868	31.0328	0.00129874	0.04183	CPXM1	gliogenic_outer_RGCs_and_astrocytes
HIGD1A	-1.08006	5.95876	30.7911	0.00132572	0.0422655	HIGD1A	gliogenic_outer_RGCs_and_astrocytes
AC090692.1	7.36197	1.85777	39.3321	0.0013477	0.0424179	AC090692.1	gliogenic_outer_RGCs_and_astrocytes
DOC2A	1.2286	3.88376	30.606	0.00134687	0.0424179	DOC2A	gliogenic_outer_RGCs_and_astrocytes
COTL1	-1.01298	4.91643	30.7144	0.00133443	0.0424179	COTL1	gliogenic_outer_RGCs_and_astrocytes
CD82	-1.50839	3.86834	30.3134	0.00138125	0.0427308	CD82	gliogenic_outer_RGCs_and_astrocytes
CSKMT	1.25879	5.11668	30.1777	0.00139759	0.0429866	CSKMT	gliogenic_outer_RGCs_and_astrocytes
C1QL1	1.68682	3.33026	30.09	0.00140829	0.0432206	C1QL1	gliogenic_outer_RGCs_and_astrocytes
RNASET2	-1.50374	5.94124	30.0336	0.00141522	0.0432723	RNASET2	gliogenic_outer_RGCs_and_astrocytes
LONRF2	1.88658	5.20808	29.9057	0.00143112	0.0433606	LONRF2	gliogenic_outer_RGCs_and_astrocytes
CDH6	-2.8152	1.41983	29.9028	0.00143148	0.0433606	CDH6	gliogenic_outer_RGCs_and_astrocytes
AL355075.4	1.01957	4.78301	29.8218	0.00144168	0.0435749	AL355075.4	gliogenic_outer_RGCs_and_astrocytes
KCNQ1OT1	-1.20169	7.81155	29.6994	0.00145726	0.0439506	KCNQ1OT1	gliogenic_outer_RGCs_and_astrocytes
ATP6V1E2	1.47075	3.48552	29.5134	0.00148138	0.0445818	ATP6V1E2	gliogenic_outer_RGCs_and_astrocytes
ANKS1B	-3.15009	4.96139	29.4648	0.00148776	0.0446776	ANKS1B	gliogenic_outer_RGCs_and_astrocytes
MSTN	4.41756	2.11315	29.2583	0.00151532	0.0451392	MSTN	gliogenic_outer_RGCs_and_astrocytes
CALB2	1.37929	3.53972	29.2805	0.00151232	0.0451392	CALB2	gliogenic_outer_RGCs_and_astrocytes
SMAD7	-2.17919	1.70662	29.2624	0.00151477	0.0451392	SMAD7	gliogenic_outer_RGCs_and_astrocytes
TMEM69	-1.05833	4.15946	29.0734	0.00154058	0.0454214	TMEM69	gliogenic_outer_RGCs_and_astrocytes
CNTN2	-1.90953	2.90113	28.9317	0.0015603	0.0454214	CNTN2	gliogenic_outer_RGCs_and_astrocytes
PELI1	-1.33271	4.55695	28.8783	0.00156782	0.0454214	PELI1	gliogenic_outer_RGCs_and_astrocytes
CTGF	-5.74757	4.07598	29.0619	0.00154216	0.0454214	CTGF	gliogenic_outer_RGCs_and_astrocytes
NPTXR	2.14536	3.6341	28.9183	0.00156218	0.0454214	NPTXR	gliogenic_outer_RGCs_and_astrocytes
AC092958.1	-5.14935	1.19987	28.6728	0.00159723	0.045901	AC092958.1	gliogenic_outer_RGCs_and_astrocytes
HOTAIRM1	-4.84539	2.06538	28.6281	0.00160371	0.0459841	HOTAIRM1	gliogenic_outer_RGCs_and_astrocytes
AC019205.1	1.31376	3.73452	28.5113	0.00162085	0.0461015	AC019205.1	gliogenic_outer_RGCs_and_astrocytes
LOXL2	-3.92858	1.8801	28.5768	0.00161121	0.0461015	LOXL2	gliogenic_outer_RGCs_and_astrocytes
PRAG1	-1.26297	4.53619	28.3744	0.00164123	0.0463929	PRAG1	gliogenic_outer_RGCs_and_astrocytes
ROM1	3.0654	2.89997	28.3504	0.00164483	0.0464009	ROM1	gliogenic_outer_RGCs_and_astrocytes
CDH11	-4.36814	2.75666	28.1155	0.00168073	0.0469026	CDH11	gliogenic_outer_RGCs_and_astrocytes
MGLL	3.06432	2.61779	28.0291	0.00169419	0.0470193	MGLL	gliogenic_outer_RGCs_and_astrocytes
WDR70	1.10682	5.34825	27.968	0.00170379	0.0470193	WDR70	gliogenic_outer_RGCs_and_astrocytes
PAM	-1.19434	5.27758	27.9986	0.00169897	0.0470193	PAM	gliogenic_outer_RGCs_and_astrocytes
AHCYL2	-1.29527	3.17719	27.969	0.00170363	0.0470193	AHCYL2	gliogenic_outer_RGCs_and_astrocytes
FOXJ1	-4.70523	0.827099	27.8248	0.00172658	0.0472743	FOXJ1	gliogenic_outer_RGCs_and_astrocytes
HLA-B	-1.71282	5.92145	27.7902	0.00173215	0.0473341	HLA-B	gliogenic_outer_RGCs_and_astrocytes
METTL1	1.51114	3.1776	27.6938	0.0017478	0.0476684	METTL1	gliogenic_outer_RGCs_and_astrocytes
FKBP5	-2.37974	2.74493	27.6342	0.00175755	0.047841	FKBP5	gliogenic_outer_RGCs_and_astrocytes
PTCH1	-1.75209	3.87264	27.5934	0.00176429	0.0478859	PTCH1	gliogenic_outer_RGCs_and_astrocytes
TSTD2	1.08539	4.79527	27.5826	0.00176606	0.0478859	TSTD2	gliogenic_outer_RGCs_and_astrocytes
TRERF1	-1.1086	3.61799	27.4766	0.00178372	0.0481585	TRERF1	gliogenic_outer_RGCs_and_astrocytes
POU2F2	-1.09193	3.72005	27.4603	0.00178646	0.0481585	POU2F2	gliogenic_outer_RGCs_and_astrocytes
ARRDC4	-1.1795	3.55642	27.4119	0.00179461	0.048285	ARRDC4	gliogenic_outer_RGCs_and_astrocytes
POU3F1	-3.27893	3.08198	27.3691	0.00180187	0.0483513	POU3F1	gliogenic_outer_RGCs_and_astrocytes
KIAA1586	1.16491	4.76144	27.3363	0.00180746	0.0483513	KIAA1586	gliogenic_outer_RGCs_and_astrocytes
NIPA1	-1.28081	3.36886	27.3363	0.00180746	0.0483513	NIPA1	gliogenic_outer_RGCs_and_astrocytes
NES	-1.78035	6.6066	27.1194	0.00184498	0.0487018	NES	gliogenic_outer_RGCs_and_astrocytes
EIF3J	1.00923	7.13429	27.1407	0.00184125	0.0487018	EIF3J	gliogenic_outer_RGCs_and_astrocytes
FDXR	-1.30176	3.70849	27.1205	0.00184478	0.0487018	FDXR	gliogenic_outer_RGCs_and_astrocytes
LZTFL1	-1.1673	3.95361	26.8964	0.00188463	0.0492629	LZTFL1	gliogenic_outer_RGCs_and_astrocytes
AC110491.1	7.43511	1.91774	33.984	0.0018874	0.0492629	AC110491.1	gliogenic_outer_RGCs_and_astrocytes
THEM6	1.45591	3.28294	26.7037	0.00191982	0.0497371	THEM6	gliogenic_outer_RGCs_and_astrocytes

## Sheet: unknown
	logFC	logCPM	F	p_val	p_adj	gene	cluster_id
AL133367.1	4.53882	7.06631	1170.6	1.46386e-06	0.0204706	AL133367.1	unknown
MEF2C	2.7757	5.85149	494.325	9.87121e-06	0.046013	MEF2C	unknown
NEAT1	-2.38697	10.0685	560.613	7.47527e-06	0.046013	NEAT1	unknown
