# Supplementary material for: Brain corticogenesis and cholesterol homeostasis promotes SARS-CoV-2 infection and replication
Source: Research Square preprint supplement (doi:10.21203/rs.3.rs-2481841/v1), 2023-02-10
Supplement: Supplementary file 3 [file a77b122f35dee9a56983ac82.xlsx]

## Sheet: RGCs + goRGCs&Astro
gene	D60_1	D60_2	D120_1	D120_2
LPL	235.197	192.903	288.249	289.48
ATF5	389.894	473.6	693.5	713.058
CBS	226.591	133.411	241.094	238.934
MAL2	251.812	192.277	274.385	270.826
CYP51A1	195.993	169.728	228.296	229.7
TRIB3	258.717	278.739	305.502	299.266
ALDOC	298.695	305.016	354.375	349.492
PCYT2	236.422	249.132	267.301	265.804
FABP5	640.726	472.144	730.618	764.436
ACSS2	215.436	197.762	242.767	234.483
MVD	309.133	305.722	350.798	356.836
GSTM2	222.738	199.245	245.448	243.163
ACAT2	434.553	421.798	504.584	525.765
SCD	466.595	438.82	512.58	517.079
FADS2	314.106	287.97	342.709	337.699
NFIL3	279.849	264.636	294.268	301.655
SQLE	532.92	499.224	610.513	610.713
TNFRSF12A	220.196	220.364	237.964	241.678
PNRC1	374.637	395.894	437.455	434.121
LSS	283.123	233.376	282.828	288.114
DHCR7	292.364	263.661	301.793	293.711
PDK3	225.031	236.711	235.709	243.362
NSDHL	239.049	230.608	249.496	246.609
SC5D	250.619	250.478	260.7	266.392
