# Supplementary material for: Brain corticogenesis and cholesterol homeostasis promotes SARS-CoV-2 infection and replication
Source: Research Square preprint supplement (doi:10.21203/rs.3.rs-2481841/v1), 2023-02-10
Supplement: Supplementary file 4 [file f8108e541182df676083c655.xlsx]

## Sheet: CN + VP&N2
gene	D60_1	D60_2	D120_1	D120_2
LPL	194.485	149.19	376.76	392.367
MAL2	166.385	159.48	237.786	243.968
GSTM2	147.657	140.299	204.247	204.67
ANTXR2	184.445	162.132	238.784	235.953
ALDOC	252.887	265.096	345.28	322.643
ATF5	345.468	433.437	489.265	468.908
CYP51A1	162.94	200.067	210.553	204.019
CD9	174.301	215.16	220.463	234.115
TRIB3	184.04	229.653	232.034	237.773
FABP5	707.313	541.291	777.21	778.94
PCYT2	180.027	214.252	221.009	225.757
CLU	256.749	244.759	285.774	287.393
CBS	162.849	206.033	215.903	202.711
GPX8	167.695	114.492	186.511	207.406
FBXO6	158.333	182.895	204.847	197.757
ABCA2	175.692	215.321	226.283	231.027
TNFRSF12A	166.221	188.124	182.816	214.884
PDK3	160.978	188.157	213.682	210.199
PNRC1	301.608	334.602	340.13	330.718
GUSB	179.066	218.23	224.665	223.039
ACSS2	175.054	207.25	225.396	226.945
SC5D	216.551	251.083	270.787	267.825
ETHE1	208.183	217.982	239.33	240.18
TM7SF2	266.282	260.579	268.609	278.746
MVD	287.759	371.684	358.322	347.109
FADS2	253.53	292.924	292.288	277.176
GNAI1	258.976	252.791	260.198	262.47
ANXA5	214.202	227.726	245.576	235.388
ACAT2	473.84	481.54	459.811	476.903
NSDHL	209.065	224.285	222.662	220.511
TP53INP1	180.768	200.908	232.703	222.943

## Sheet: RGCs + goRGCs&Astro
gene	D60_1	D60_2	D120_1	D120_2
LPL	235.197	192.903	288.249	289.48
ATF5	389.894	473.6	693.5	713.058
CBS	226.591	133.411	241.094	238.934
MAL2	251.812	192.277	274.385	270.826
CYP51A1	195.993	169.728	228.296	229.7
TRIB3	258.717	278.739	305.502	299.266
ALDOC	298.695	305.016	354.375	349.492
PCYT2	236.422	249.132	267.301	265.804
FABP5	640.726	472.144	730.618	764.436
ACSS2	215.436	197.762	242.767	234.483
MVD	309.133	305.722	350.798	356.836
GSTM2	222.738	199.245	245.448	243.163
ACAT2	434.553	421.798	504.584	525.765
SCD	466.595	438.82	512.58	517.079
FADS2	314.106	287.97	342.709	337.699
NFIL3	279.849	264.636	294.268	301.655
SQLE	532.92	499.224	610.513	610.713
TNFRSF12A	220.196	220.364	237.964	241.678
PNRC1	374.637	395.894	437.455	434.121
LSS	283.123	233.376	282.828	288.114
DHCR7	292.364	263.661	301.793	293.711
PDK3	225.031	236.711	235.709	243.362
NSDHL	239.049	230.608	249.496	246.609
SC5D	250.619	250.478	260.7	266.392
